# The rate and potential relevance of new mutations in a colonizing plant lineage

Moises Exposito-Alonso<sup>1,2†</sup>, Claude Becker<sup>1†</sup>, Verena J. Schuenemann<sup>3,4</sup>, Ella Reiter<sup>3</sup>, Claudia Setzer<sup>5</sup>, Radka Slovak<sup>5</sup>, Benjamin Brachi<sup>6§</sup>, Jörg Hagemann<sup>1§</sup>, Dominik G. Grimm<sup>1§</sup>, Jiahui Chen<sup>6,7</sup>, Wolfgang Busch<sup>5§</sup>, Joy Bergelson<sup>6</sup>, Rob W. Ness<sup>8</sup>, Johannes Krause<sup>3,4,9</sup>, Hernán A. Burbano<sup>2,\*</sup>, Detlef Weigel<sup>1,\*</sup>

<sup>1</sup>Department of Molecular Biology, Max Planck Institute for Developmental Biology, 72076 Tübingen, Germany

<sup>2</sup>Research Group for Ancient Genomics and Evolution, Max Planck Institute for Developmental Biology, 72076 Tübingen, Germany

<sup>3</sup>Institute of Archaeological Sciences, University of Tübingen, 72070 Tübingen, Germany

<sup>4</sup>Senckenberg Center for Human Evolution and Paleoenvironment, University of Tübingen, 72070 Tübingen, Germany

<sup>5</sup>Gregor Mendel Institute, Austrian Academy of Sciences, 1030 Vienna, Austria

<sup>6</sup>Department of Ecology and Evolution, University of Chicago, Chicago, Illinois 60637, USA

<sup>7</sup>Institute of Tibet Plateau Research, Chinese Academy of Sciences, Beijing 100101, China

<sup>8</sup>Department of Biology, University of Toronto Mississauga, Mississauga, Ontario L5L 1C6, Canada.

<sup>9</sup>Max Planck Institute for the Science of Human History, 07743 Jena, Germany

†Co-first authors

§Current addresses: INRA, UMR 1202 Biodiversité Gènes & Communautés, 33610 CESTAS, France (B.B.); Computomics, 72072 Tübingen, Germany (J.H.); Department of Biosystems Science and Engineering, ETH Zurich, 4058 Basel, Switzerland (D.G.G.); Salk Institute for Biological Studies, La Jolla, CA 92037, USA (W.B.).

\*Correspondence to: [hernan.burbano@tuebingen.mpg.de](mailto:hernan.burbano@tuebingen.mpg.de), [weigel@weigelworld.org](mailto:weigel@weigelworld.org)

Running title: *de novo* mutation rate in *A. thaliana*

Keywords: colonization, mutation, selection, herbarium genomes, aDNA, phylogenomics, population genomics, association mapping, *Arabidopsis thaliana*

27 **ABSTRACT**

28 **By following the evolution of populations that are initially genetically homogeneous, much**  
29 **can be learned about core biological principles. For example, it allows for detailed studies**  
30 **of the rate of emergence of *de novo* mutations and their change in frequency due to drift**  
31 **and selection. Unfortunately, in multicellular organisms with generation times of months**  
32 **or years, it is difficult to set up and carry out such experiments over many generations. An**  
33 **alternative is provided by “natural evolution experiments” that started from colonizations**  
34 **or invasions of new habitats by selfing lineages. With limited or missing gene flow from**  
35 **other lineages, new mutations and their effects can be easily detected. North America has**  
36 **been colonized in historic times by the plant *Arabidopsis thaliana*, and although multiple**  
37 **intercrossing lineages are found today, many of the individuals belong to a single lineage,**  
38 **HPGI. To determine in this lineage the rate of substitutions – the subset of mutations that**  
39 **survived natural selection and drift –, we have sequenced genomes from plants collected**  
40 **between 1863 and 2006. We identified 73 modern and 27 herbarium specimens that**  
41 **belonged to HPGI. Using the estimated substitution rate, we infer that the last common**  
42 **HPGI ancestor lived in the early 17<sup>th</sup> century, when it was most likely introduced by**  
43 **chance from Europe. Mutations in coding regions are depleted in frequency compared to**  
44 **those in other portions of the genome, consistent with purifying selection. Nevertheless, a**  
45 **handful of mutations is found at high frequency in present-day populations. We link these**  
46 **to detectable phenotypic variance in traits of known ecological importance, life history and**  
47 **growth, which could reflect their adaptive value. Our work showcases how, by applying**  
48 **genomics methods to a combination of modern and historic samples from colonizing**  
49 **lineages, we can directly study new mutations and their potential evolutionary relevance.**

50 **SUMMARY**

51 A consequence of an increasingly interconnected world is the spread of species outside their native  
52 range — a phenomenon with potentially dramatic impacts on ecosystem services. Using population  
53 genomics, we can robustly infer dynamics of colonization and successful population establishment. We  
54 have compared hundred genomes of a single *Arabidopsis thaliana* lineage in North America, including  
55 genomes of contemporary individuals as well as 19<sup>th</sup> century herbarium specimens. These differ by an  
56 average of about 200 mutations, and calculation of the nuclear evolutionary rate enabled the dating of  
57 the initial colonization event to about 400 years ago. We also found mutations associated with  
58 differences in traits among modern individuals, suggesting a role of new mutations in recent adaptive  
59 evolution.

60 **INTRODUCTION**

61 Colonizing or invasive populations sampled through time (1,2) constitute “natural experiments” where it  
62 is possible to study evolutionary processes in action (3). Colonizations, which are dramatically increasing  
63 in number (4,5), sometimes are characterized by strong bottlenecks and genetic isolation (6,7), and thus  
64 greatly facilitate the observation of new mutations and potentially their effects under natural population  
65 dynamics and selection (8). Colonizations thus offer a complementary approach to other studies of new  
66 mutations, which often minimize natural selection, for example in laboratory mutation accumulation  
67 experiments (9) and parent-offspring comparisons (10). The study of colonizations is also  
68 complementary to the investigation of genetic divergence over long time scales, e.g., between distant  
69 species (11), where the results are largely independent of short-term demographic fluctuations. There is

70 broad interest in understanding how genetic diversity is generated (12),(12)and how new mutations can  
71 provide a path for rapid adaptive evolution (13–15). Additionally, accurate evolutionary rates permit  
72 dating historic population splits, which is fundamental to the study of population history (16).

73         The analysis of colonizing populations can also contribute to resolving the “genetic paradox of  
74 invasion” (17). This paradox comes from the observation that colonizing populations can be surprisingly  
75 successful and spread very widely even when strongly bottlenecked, suggesting some level of adaptation  
76 to new environments that goes beyond the exploitation of unoccupied ecological niches (17). Much of  
77 the work in plant ecology and evolution has focused on evidence that populations can rapidly adapt from  
78 standing variation (18). In invasive lineages, initial standing variation may originate from incomplete  
79 bottlenecks, multiple introductions, or admixture with local relatives (19). Much less work has been  
80 done with respect to the role of *de novo* mutations as a solution to the genetic paradox of invasion,  
81 although this has been proposed as an alternative explanation for rapid adaptation by colonizing lineages  
82 (3,17,20).

83         The self-fertilizing plant *Arabidopsis thaliana* is native to Africa and Eurasia (21,22) but has  
84 recently colonized N. America, where it likely experienced a strong founder effect (23). At nearly half of  
85 N. American sites sampled during the 1990s and early 2000s, more than 80% of plants belong to a single  
86 haplogroup, HPGI, as inferred from genotyping with 149 intermediate-frequency markers evenly spread  
87 throughout the genome (23). The HPGI lineage has been reported from many sites along the East Coast  
88 and in the Midwest as well as at a few sites in the West (23) (Figure 1, Table S1). The great ubiquity of  
89 HPGI in comparison to any other haplogroup could be due to either some adaptive advantage, or, more  
90 parsimoniously, be the result of HPGI being derived from one of the first arrivals of *A. thaliana* in the  
91 continent.

92           Here, we focus on 100 HPGI individuals that do not show any evidence of outcrossing with  
93 other lineages. We combine genomes from herbarium specimens and live individuals, collectively  
94 covering the time span from 1863 to 2006, to infer mutation rates, to date the birth of the HPGI  
95 lineage, and to investigate the evolutionary forces that shape genetic diversity. Our analyses of this  
96 lineage serves as a model for future studies of similar colonizing or otherwise recently bottlenecked  
97 plant populations, in order to better understand how diversity is generated and to which extent it  
98 contributes to adaptation in nature.

## 99 **RESULTS AND DISCUSSION**

### 100 **Historic and modern genomes**

101 In a self-fertilizing species, a single individual can give rise to an entire lineage of millions of offspring,  
102 which then diversify through new mutations and eventually intra-lineage recombination. If  
103 self-fertilization is much more common than outcrossing, the founder is likely to have been homozygous  
104 throughout almost the entire genome. Because it is so wide spread, HPGI presents an opportunity to  
105 sample many natural populations that have been potentially derived from a common, very recent  
106 ancestor with such characteristics. In the best possible case, this would allow for new mutations to be  
107 directly observed through time. To test these assumptions and to better understand the evolution of  
108 HPGI, we sequenced two different groups of plants. The first group were live descendants of 87 plants  
109 that had been collected between 1993 and 2006 (Fig. 1; Table S1), and which had been identified as likely  
110 members of the HPGI lineage with 149 genome-wide markers spaced at roughly 1-Mb-intervals (23).  
111 We aimed for broad geographic representation, with at least two accessions per collection site, where  
112 available. The second group comprised 35 herbarium specimens, collected between 1863 and 1993, for  
113 which we had no a priori information whether they may or may not belong to the HPGI lineage, but

114 which were selected from the herbarium records to cover the full historical geographic range and  
115 overlap with modern samples when possible (Fig. 1).

116 The DNA from the herbarium specimens showed biochemical features typical of ancient DNA  
117 (aDNA) from plants, which we have previously described in detail (24). Such DNA damage included a  
118 median fragment length of 60 bp, an excess of C-to-T substitutions of about 2.5% at the first base of  
119 sequencing reads and a 1.5 to 1.8 fold enrichment of purines at DNA breakpoints (Fig. S1,  
120 Supplementary Text 2). To remove aDNA associated damage and produce high-quality genomes,  
121 chemically-repaired libraries (see Methods) were later sequenced. These reads were mapped against an  
122 HPGI pseudo-reference genome (25), focusing on single nucleotide polymorphisms (SNPs) because the  
123 short sequence reads of herbarium samples preclude accurate calling of structural variants. Genome  
124 sequences were of high quality, with herbarium samples covering 96.8–107.2 Mb of the 119 Mb  
125 reference, and modern samples covering 108.0–108.3 Mb (Table S1).

## 126 **Genetic diversity of HPGI and delineation from other lineages**

127 We visualized the relationships between the sequenced historic and modern plants building a neighbor  
128 joining tree of all 123 samples and confirmed that the majority fell within a almost-identical clade, the  
129 HPGI (Fig. 2A) (23). Because any degree of introgression from other non-HPGI lineages would  
130 confound the discovery of new mutations downstream, we removed all divergent samples and built a  
131 neighbour joining tree (n=103 samples), which revealed that the HPGI samples were very similar to  
132 each other, with very little within-population structure (Fig. 2B). A parsimony network was used to  
133 detect recombinant genomes within this HPGI clade (Fig. 2C), which led us to remove three potential  
134 intra-lineage recombinants. Repeating the parsimony network cleared all previously inferred reticulations  
135 due to recombinations (Fig. 2D). After such stringent filtering, we kept 27 of the 35 herbarium samples,

136 and 73 of the 87 modern samples (Table S1). These constitute a set of non-admixed, non-recombined  
137 and quasi-identical HPGI individuals.

138 Pairs of HPGI herbarium genomes differed by 28-207 SNPs genome-wide, pairs of HPGI  
139 modern genomes by 2-259 SNPs, and pairs of historic-modern HPGI genomes by 56-244 SNPs. That is,  
140 whole-genome identity was at least 99.9997% in any of pair-wise comparison. Of the approximately five  
141 to six thousand segregating SNPs in the HPGI population, the vast majority, about 95% (Supplementary  
142 Text 3), have not been reported outside of this lineage (21). Importantly, the density of SNPs along the  
143 genome was low and evenly distributed (typically fewer than 20 SNPs / 100 kb) with no peaks of much  
144 higher frequency, which makes us confident that chunks of introgressions from other lineages do not  
145 exist in this putatively pure HPGI set (Fig. 4). As a reminder, random pairs of *A. thaliana* accessions  
146 from the native range or pairs of non-HPGI typically differ by about 500 SNPs / 100 kb (21) (see scale in  
147 Fig. 2A).

148 There were no SNPs in mitochondrial nor chloroplast genomes, which already suggested a  
149 recent common origin, and genome-wide nuclear diversity ( $\pi = 0.000002$ ,  $\theta_{\text{W}} = 0.00001$ , with 5,013 full  
150 informative segregating sites) was two orders of magnitude lower than in the native range of the species  
151 ( $\theta_{\text{W}} = 0.007$ ) (21) (Table S1) (Supplementary Text 6). The population recombination parameter was  
152 also four orders of magnitude lower ( $4N_e r = \rho = 3.0 \times 10^{-6}$  cM bp<sup>-1</sup>) than in the native range ( $\rho =$   
153  $7.5 \times 10^{-2}$  cM bp<sup>-1</sup>) (26) (Supplementary Text 6). While recombination occurs in every generation,  
154 regardless of self-fertilization or outcrossing, it is only observable after outcrossing between genetically  
155 non-identical individuals, and this is what the population recombination parameter reports. We must  
156 stress that because *A. thaliana* can outcross at rates of several percent per generation (23,27), but  
157 because the HPGI population is genetically so homogeneous, we are mostly “blind” to the  
158 consequences of outcrossing in this special case. The lack of “observable recombination” in the genome

159 is important, as it allows for the use of straightforward phylogenetic methods to calculate a mutation  
160 rate. The enrichment of low frequency variants in the site frequency spectrum (Tajima's  $D = -2.84$ ;  
161 species mean =  $-2.04$ , (21)) and low levels of polymorphism are consistent with a recent bottleneck  
162 followed by population expansion (Fig. 3). The obvious explanation is that the strong bottleneck  
163 corresponds to a colonization founder event, likely by very few closely related individuals, or perhaps  
164 only a single plant.

165 Altogether these patterns indicate that the collection of HPGI plants we investigated constitute  
166 a quasi-clonal and quasi-identical set of individual genomes, mostly devoid of observable recombination  
167 and population structure, and thus eminently suited for the study of naturally arising *de novo* mutations.

### 168 **The genome-wide substitution rate**

169 It is important to distinguish between the *mutation rate*, which is the rate at which genomes change due  
170 to DNA damage, faulty repair, gene conversion and replication errors, and *substitution rate*, which is the  
171 rate at which mutations survive and accumulate under the influence of demographic processes and  
172 natural selection (28,29). Under neutral evolution, mutation and substitution rates should be equal (29).  
173 The simple evolutionary history of the HPGI population enables direct estimates of substitution rates,  
174 and the comparison of these between different genome annotations, as well as with mutation rates  
175 from controlled conditions experiments, could reveal the role played by both demographic and selective  
176 forces.

177 To estimate the substitution rate in the HPGI lineage, we used distance- and phylogeny-based  
178 methods that take advantage of the known collection dates (Supplementary Text 7). The distance  
179 method is independent of recombination and has been previously applied to viruses (30) and humans  
180 (31). The substitution rate is calculated from correlation between differences in collection time in  
181 historic-modern sample pairs, and the number of nucleotide differences between those pairs relative to



182 a reference (Fig. 3C), scaled to the size of the genome accessible to Illumina sequencing. This method  
183 resulted in an estimated rate of  $2.11 \times 10^{-9}$  substitutions site<sup>-1</sup> year<sup>-1</sup> (95% bootstrap Confidence Interval  
184 [CI]:  $1.88\text{--}2.33 \times 10^{-9}$ ) using rigorous SNP calling quality thresholds. Relaxing the thresholds for base  
185 calling and minimum genotyped rate affects both the number of called SNPs and the length of the  
186 interrogated reference sequence (32). These largely cancelled each other out, and the adjusted estimates  
187 were relatively stable, between  $2.1\text{--}3.2 \times 10^{-9}$  substitutions site<sup>-1</sup> year<sup>-1</sup> (Table S3, Supplementary Text  
188 3).

189 The second method, a Bayesian phylogenetic approach, uses the collection years for  
190 tip-calibration and assumes a relaxed molecular clock. It summarizes thousands of plausible coalescent  
191 trees, and it has been extensively used to calculate evolutionary rates in various organisms (33–35). This  
192 method yielded a substitution rate of  $4.0 \times 10^{-9}$ , with confidence ranges overlapping the above estimates  
193 (95% Highest Posterior Probability Density [HPPD]:  $3.2\text{--}4.7 \times 10^{-9}$ ).

194 Based on the similar results obtained with two very different methods, we can confidently say  
195 that the substitution rate in the wild populations of HPGI is between  $2$  and  $5 \times 10^{-9}$  site<sup>-1</sup> year<sup>-1</sup>.

196 To date the colonization of N. America by HPGI *A. thaliana* and to improve the description of  
197 intra-HPGI relationships compared to that from a NJ tree, we further used a Bayesian phylogeny. At  
198 first sight, the 73 modern samples appeared separated from the herbarium samples (Fig. 3B), but the  
199 superimposition of thousands of possible trees showed that the apparent separation of samples was less  
200 clear near the root (Fig. 3A). Long terminal branches reflected that the majority of the variants are  
201 singletons, typical of populations that expand after bottlenecks.

202 The mean estimate of the last common HPGI ancestor, the average tree root, was the year  
203 1597 (HPPD 95%: 1519–1660) (Fig. 3A, B), and an alternative non-phylogenetic method gave a similar  
204 estimate, 1625. Both estimates are older than a previously suggested date in the 19<sup>th</sup> century, using a

laboratory mutation rate estimate and having no information from herbarium samples (25). Because HPGI appears to have been the most abundant lineage in N. America since the 1860s, we believe it could have been one of the first, if not the first colonizer that could establish itself in N. America. If that is true, the time of coalescence of the HPGI diversity could be close to the time of HPGI introduction to N. America. During the colonial period, many European immigrants settled on the East coast, consistent with N. American *A. thaliana* lineages being genetically closest to British and coastal West European populations (21). Coincidentally, the oldest herbarium samples (12 out of the 27) were HPGI and came from the East Coast, and we found a significant correlation between collection date and both latitude and longitude (Fig. 1C). This could indicate that after the colonization they moved from the East Coast to the Midwest – the other main area of the distribution that experienced an agricultural expansion in the 19<sup>th</sup> century (36). Still, these conclusions need to be treated with caution, since regardless of the robustness of the results and our attempts to sample evenly from available collections, there could be unknown biases in the 19<sup>th</sup> century herbaria.

### 218 **Mutation spectra across genome annotations**

Although for dating divergence events a substitution rate expressed by years is ideal, in order to compare substitution and mutation rates, both need to be expressed per generation. While *A. thaliana* is an annual plant, seed bank dynamics generate a delay of average generation time at the population scale. A comprehensive study of multiple *A. thaliana* populations in Scandinavia found that dormant seeds could wait for longer than a year in the seed bank, generating overlapping generations and an delayed average generation time of 1.3 years (37) with a notable variance across populations. Multiplication by the mean generation time led to an adjusted rate of  $2.7 \times 10^{-9}$  substitutions site<sup>-1</sup> generation<sup>-1</sup> (95% CI 2.4-3.0  $\times 10^{-9}$ ) (Fig. 3E). To be able to compare this rate with a reference, we also re-sequenced mutation accumulation (MA) lines in the Col-0 reference background grown under controlled conditions in the

228 greenhouse that had been analyzed before with less advanced short read sequencing technology (38).  
229 From the new re-sequencing data, we obtained an updated rate of  $7.1 \times 10^{-9}$  mutations site<sup>-1</sup>  
230 generation<sup>-1</sup> (95% CI  $6.3\text{--}7.9 \times 10^{-9}$ ) (Tables S2, S3, Supplementary Text 4 and 7). This is two- to  
231 three-fold higher than the per-generation estimate in the wild, but within the same order of magnitude.  
232 The same holds for rates in different genome annotations, i.e. genic, intronic and intergenic regions, but  
233 the confidence intervals overlapped in many cases (Table S3).

234 Differences in per-generation rates between laboratory and wild populations could stem from  
235 both methodological as well as biological causes. For instance, if the true average generation time was  
236 actually over 3 years / generation, the differences would cancel out (Fig. 3E). Limitations in mapping  
237 structural variation in non-reference samples could lower the substitution rate, what explains that we  
238 calculated an atypically low substitution rate in regions with transposable elements (see Supplementary  
239 Text 7.2.1). Environmentally-driven effects that are not yet well understood, such as variable  
240 methylation status of cytosines, which account for much of the variation in local substitution rates (39),  
241 could increase or decrease the rate (see Supplementary Text 7.2.3, Fig. S4).

242 An alternative evolutionary explanation to the aforementioned laboratory and wild populations'  
243 rates differences is that purifying selection in the wild would slow down the accumulation of mutations  
244 by removing deleterious mutations (Fig. 3E). This has been observed before and is one of the accepted  
245 causes of the discrepancy between the so called long- and short-term substitution rates in a range of  
246 organisms (40).

247 In order to provide evidence for negative purifying selection acting in the wild, we performed  
248 three types of analyses involving comparisons across genomic annotations within the HPGI dataset.  
249 Firstly, by calculating contingency tables and computing a Fisher's exact test, we compared the deviation  
250 of expected and observed SNPs between coding regions (more likely under purifying selection), with

251 intergenic regions, intronic regions, and all non-coding regions of genome. All three pairwise  
252 comparisons showed a depletion of coding SNPs and an enrichment of intergenic, intronic and  
253 non-coding SNPs (odds ratio $>2$ ,  $p<10^{-16}$ ). An obvious explanation is that in genome annotations where  
254 a mutation is more likely to be deleterious, i.e. coding regions, the number of observed variants should  
255 be lower due to selection having removed them from the population before we could sequence them.

256 Secondly, we studied the Site Frequency Spectrum (SFS) of genetic variants. The rationale was  
257 that because purifying natural selection is more efficient at removing intermediate-frequency variants,  
258 variants that tend to be deleterious or slightly deleterious should be found at lower frequency than  
259 those that only suffer neutral drift (41). We built contingency tables of coding, intergenic, intronic and  
260 non-coding variants segregating above and below the conventional frequency cutoff of 5% to  
261 separate low- and intermediate-frequency variants (42). We found that SNPs in coding regions were  
262 more likely to be at low frequency than those in intergenic (odds ratio=2.34,  $p=3.09\times 10^{-11}$ ), intronic  
263 (odds ratio=1.48,  $p=0.02$ ), and all non-coding regions (odds ratio=2.05,  $p=1.29\times 10^{-8}$ ). We carried out  
264 the same analysis using nonsynonymous and synonymous SNPs, which are easily interpretable in terms  
265 of the selection regimes under which they evolve. We did not find an enrichment ( $p=0.67$ ), perhaps a  
266 consequence of the small number of such mutations (Table S3).

267 Thirdly, to verify that the full frequency spectrum of coding SNPs was shifted to lower  
268 frequencies (i.e. the results were not dependent on the arbitrary 5% frequency cutoff), we used the  
269 nonparametric Kolmogorov-Smirnov test for two samples. We found that the cumulative distribution of  
270 the site frequency spectrum ( $CD_{SFS}$ ) of coding regions is above (i.e., the frequency distribution is overall  
271 skewed to lower values) both the intergenic  $CD_{SFS}$  ( $p=3.25\times 10^{-6}$ ) and the non-coding regions  $CD_{SFS}$   
272 ( $p=0.001$ ), but not the intronic  $CD_{SFS}$  ( $p=0.60$ ) (Fig. S5). As in our previous analysis, the comparison

273 between the nonsynonymous and synonymous  $CD_{SF5}$  yielded, likely for similar reasons, no differences  
274 ( $p=0.53$ ).

275 All in all, these results support that purifying selection is a force shaping to some degree the  
276 diversity across the HPGI genome and might therefore as well contribute to the differences between  
277 HPGI and MA rates.

### 278 **Potentially advantageous *de novo* mutations**

279 Finally, having discovered over 5,000 *de novo* mutations in the HPGI lineage, we wondered whether  
280 there is any evidence for an adaptive role of these *de novo* mutations in the colonization of N. America  
281 by HPGI. We noted that some new mutations had risen to intermediate or even high frequencies in the  
282 HPGI samples. This might have been the consequence of drift from stochastic demographic processes,  
283 or it could have been caused by positive natural selection. To find direct evidence for the latter, we  
284 grew the modern accessions in a common garden and studied phenotypes of known importance in  
285 ecology of invasions (43), namely flowering time and root traits (see Supplementary Text 8). Using linear  
286 mixed models, we calculated the proportion of variance explained (also called narrow sense heritability,  
287  $h^2$ ) with a kinship matrix of all SNPs that had become common ( $>5\%$ ,  $n=391$ ). We found significant  
288 heritable variation for multiple traits including the growth rate in length ( $h^2=0.64$ ) and the average root  
289 gravitropic direction ( $h^2=0.54$ ). As in our study mutations are the main source of genetic variants, these  
290 mutations — or mutations linked to them — should be responsible for significant quantitative variation  
291 in several traits (Table S4, Supplementary Text 10). The existence of mutation-driven phenotypic  
292 variation at least indicates that natural selection could have acted upon such phenotypic variation.

293 Although linkage disequilibrium (LD) among SNPs is high, the fact that HPGI genomes differ in  
294 very few SNPs greatly reduces the list of candidate loci that might generate the observed phenotypic  
295 variation (Fig. S6) (44). With this reasoning in mind and understanding the limitations imposed by LD, we

296 carried out a genome-wide association (GWA) analysis and found 79 SNPs associated with one or more  
297 root traits, mostly growth and directionality (Fig. 4). Twelve SNPs were in coding regions and seven  
298 resulted in nonsynonymous changes — some producing non-conservative amino-acid changes and thus  
299 likely to affect protein structure and/or function (Table I, based on transition scores from (45)). Due to  
300 the aforementioned LD, in some cases the results of associations could not be confidently assigned to a  
301 specific SNP and thus we report the number of other associated mutations with  $r^2 > 0.5$  (Table I, Fig.  
302 S6). For other cases, we were able to pinpoint clear candidates that were not in LD with other SNPs  
303 and whose functional annotation had a strong connection to the phenotype (Table I, Fig. S6). For  
304 example, one SNP associated with root gravitropism was not linked to any other SNP hit and it was  
305 found at 40% frequency (top 3% percentile). This SNP produces a cysteine to tryptophan change in  
306 AT5G19330, which is involved in abscisic acid response and confers salt tolerance when overexpressed  
307 (46). Another nonsynonymous SNP associated with root growth is located in AT2G38910, which  
308 encodes a calcium-dependent kinase that is a factor regulating root hydraulic conductivity and  
309 phytohormone response *in vitro* (47,48).

310 Nineteen other SNPs were associated with climate variables after correction for latitude and  
311 longitude ([www.worldclim.org](http://www.worldclim.org), Table S4), and generally tended to coincide with top root-associated  
312 SNPs (odds ratio = 3.9, Fisher's Exact test  $p = 0.002$ ; Fig. 4, and Table S5). Specifically, this means that  
313 alleles increasing root length and gravitropic growth were present in areas with lower precipitation, and  
314 *vice versa* (Pearson's correlation  $r=0.85$ ,  $p=0.003$ ). This indicates that phenotypic variation generated by  
315 mutations coincides with environmental (and not geographic) gradients along the colonized areas.  
316 Compared to other mutations with matched allele frequencies, root-associated mutations are first found  
317 in older herbarium samples nearer to Lake Michigan (Fig. S5), the area in US that seems to be most  
318 populated by *A. thaliana* (21). This could be explained by natural selection having maintained mutations

319 with phenotypic effect for a longer time than neutral mutations or perhaps that this mutations were  
320 selected for in a new environment. All in all our results are compatible with natural positive selection  
321 having already acted on root morphology variation that was generated by *de novo* mutations in this  
322 colonizing lineage. To confirm such hypotheses of local adaptation by *de novo* mutations, it will be  
323 necessary to grow collections of divergent HPGI individuals in multiple contrasting locations over  
324 several years, and ideally revive historical specimens to compare performance (49).

## 325 **Conclusions**

326 In summary, we have exploited whole-genome information from historic and contemporary collections  
327 of a herbaceous plant to empirically characterize evolutionary forces during a recent colonization. With  
328 this natural time series experiment we could directly estimate the nuclear substitution rate in wild *A.*  
329 *thaliana* populations – a parameter difficult to characterize experimentally (9). This allowed us to date  
330 the colonization time and spread of HPGI in N. America. We provide evidence that purifying selection  
331 has already changed the site frequency spectrum in the course of just a few centuries. Finally, we  
332 discovered that a small number of *de novo* mutations that rose to intermediate frequency can together  
333 explain quantitative variation in root traits across environments. This strengthens the hypothesis that  
334 some *de novo* variation could have had an adaptive value during the colonization and expansion process,  
335 a hypothesis that has been put forward as one of the possible solutions to the genetic paradox of  
336 invasion in plants (17). This process might be more relevant in self-fertilizing plants, which typically have  
337 less diversity than outcrossing ones (50), but have higher growth rates (43) and account for the majority  
338 of successful plant colonizers (5). While *A. thaliana* HPGI is not an invasive, i.e. harmful, species, it can  
339 teach us about fundamental evolutionary processes behind successful colonizations and adaptation to  
340 new environments. Our work should encourage others to search for similar natural experiments and to  
341 unlock the potential of herbarium specimens to study “evolution in action”.

342 **METHODS**

343 **Sample collection and DNA sequencing**

344 Modern *A. thaliana* accessions were from the collection described by Platt and colleagues (23), who  
345 identified HPGI candidates based on 149 genome-wide SNPs (Table S1, Supplementary Text 1).  
346 Herbarium specimens were directly sampled by Max Planck colleagues Jane Devos and Gautam  
347 Shirsekar, or sent to us by collection curators from various herbaria (Table S1, Supplementary Text 1).  
348 Among the substantial number of specimens in the herbaria of the University of Connecticut, the  
349 Chicago Field Museum and the New York Botanical Garden, we selected herbarium specimens spaced in  
350 time so there was at least one sample per decade starting from the oldest record (1863). The  
351 differences in geographic biases of herbarium and modern collections are difficult to know (2), thus we  
352 did choose both historic and modern samples that were as regularly distributed in space as possible, and  
353 sample overlapping locations wherever possible. DNA from herbarium specimens was extracted as  
354 described (51) in a clean room facility at the University of Tübingen. Two sequencing libraries with  
355 sample-specific barcodes were prepared following established protocols, with and without repair of  
356 deaminated sites using uracil-DNA glycosylase and endonuclease VIII (refs. (52–54)) (Supplementary  
357 Text 2). We also investigated patterns of DNA fragmentation and damage typical of ancient DNA (24)  
358 (Supplementary Text 2). DNA from modern individuals was extracted from pools of eight siblings using  
359 the DNeasy plant mini kit (Qiagen, Hilgendorf, Germany). Genomic DNA libraries were prepared using  
360 the TruSeq DNA Sample or TruSeq Nano DNA sample prep kits (Illumina, San Diego, CA), and  
361 sequenced on Illumina HiSeq 2000, HiSeq 2500 or MiSeq instruments. Paired-end reads from modern  
362 samples were trimmed and quality filtered before mapping using the SHORE pipeline v0.9.0 (25,55).  
363 Because ancient DNA fragments are short (Fig. S1) we merged forward and reverse reads for herbarium  
364 samples after trimming, requiring a minimum of 11 bp overlap (51), and treated the resulting as



365 single-end reads. Reads were mapped with GenomeMapper v0.4.5s (56) against an HPGI  
366 pseudo-reference genome (25), and against the Col-0 reference genome, and SNPs were called with  
367 SHORE for the HPGI pseudo-reference genome mappings (25,57) using different thresholds  
368 (Supplementary Text 3). Average coverage depth, number of covered genome positions, and number of  
369 SNPs identified per accession relative to HPGI are reported in Table S1. We also re-sequenced the  
370 genomes of twelve Col-0 MA lines (57,58) (Table S2) (Supplementary text 4) to recalculate and update  
371 the laboratory mutation rate from Ossowski et al. (38) with the newer sequencing technologies.

### 372 **Phylogenetic methods and genome-wide statistics**

373 We used the Pegas, Ape and Adegenet packages in R (59–61) to manipulate and visualize the genetic  
374 distances of all samples as well as the HPGI subset (Supplementary Text 7). We constructed parsimony  
375 networks using SplitsTree v.4.12.3 (62), with confidence values calculated with 1,000 bootstrap  
376 iterations. We built Maximum Clade Credibility Trees using the Bayesian phylogenetic tools  
377 implemented in BEAST v.1.8 (63) (see below).

378 We estimated genetic diversity as Watterson's  $\theta$  (64) and nucleotide diversity  $\pi$ , and the  
379 difference between these two statistics as Tajimas's  $D$  (65) using DnaSP v5 (66). We estimated pairwise  
380 linkage disequilibrium (LD) between all possible combinations of informative sites, ignoring singletons, by  
381 computing  $r^2$ ,  $D$  and  $D'$  statistics using DnaSP v5 (66). For the modern individuals, we calculated the  
382 recombination parameter  $\rho$  ( $4N_e r$ ) also using DnaSP v5 (66).

### 383 **Substitution and mutation rate analyses**

384 Similarly as in Fu et al. (67), we used genome-wide nuclear SNPs to calculate pairwise “net” genetic  
385 distances using the equation  $D'_{ij} = D_{ic} - D_{jc}$ , where  $D'_{ij}$  is the net distance between a modern sample  $i$   
386 and a herbarium sample  $j$ ;  $D_{ic}$  the distance between the modern sample  $i$  and the reference genome  $c$ ;

387 and  $D_{jc}$  is the distance between a modern sample (j) and the reference genome (c). We calculated a  
388 pairwise time distance in years between the collection times,  $T_{ij}$ , and calculated the linear regression:  $D'$   
389  $= a + bT$ . The slope coefficient  $b$  describes the number of substitution changes per year. We used either  
390 all SNPs or subsets of SNPs at different annotations (genic, intergenic etc.) appropriately scaled by  
391 accessible genome length. Because the points used to calculate the regression are non-independent, a  
392 bootstrap has been recommended to overcome to a certain extent the anti-conservative confidence  
393 intervals (30) (Supplementary Text 7 and Fig. S3).

394 To fully account for the non-independence of points, we need to work with phylogenies. The  
395 Bayesian phylogenetics approach we used is implemented in BEAST v1.8 (63) and is called tip-calibration,  
396 and calculates a substitution rate along the phylogeny. Our analysis optimized simultaneously and in an  
397 iterative fashion using a Monte Carlo Markov Chain (MCMC) a tree topology, branch length,  
398 substitution rate, and a demographic Skygrid model (Supplementary Text 7). The demographic model is  
399 a Bayesian nonparametric one that is optimized for multiple loci and that allows for complex  
400 demographic trajectories by estimating population sizes in time bins across the tree based on the  
401 number of coalescent - branching - events per bin (68). We also performed a second analysis run using a  
402 fixed prior for substitution rate of  $3 \times 10^{-9}$  substitutions site<sup>-1</sup> year<sup>-1</sup> based on our previous net distance  
403 estimate to confirm that the MCMC had the same parameter convergence, e.g. tree topology, as in the  
404 first “estimate-all-parameters” run.

405 Having a substitution rate per year we can estimate the time to the most common recent  
406 ancestor  $L$  solving  $d = 2L \times \mu$  where  $d$  is the average pairwise genetic distance between our samples and  
407  $\mu$  is the calculated substitution rate from the distance method. This yielded 363 years, which subtracted  
408 to the average collection date of the samples, produced a point estimate of 1615. We compare this  
409 estimate with the inferred phylogeny root from the BEAST analysis.

## 410 **Inference of genome-wide selection**

411 We separately analyzed sequences at different annotations, since as they might be under different  
412 selection regimes (i.e. evolutionary constraints). We computed one-tailed Fisher's exact test using the  
413 base stats package in R (69) on tables of counts of the total number of positions in the genome  
414 annotated as a coding or non-coding (intergenic, intronic, all other noncoding) and the number of SNPs  
415 of each annotation present in the HPGI dataset:

$$\frac{\text{coding SNP}}{\text{non-coding SNP}} \quad \left| \quad \frac{\text{all coding base pairs}}{\text{all non-coding base pairs}}\right.$$

416 The test will return whether coding regions have a lower number of SNPs than other reference  
417 annotation (intronic, intergenic, all non-coding regions), as expected by the total number of positions in  
418 the genome annotated as such. We also constructed contingency tables to test whether the SNPs are  
419 more likely to be found at low (<5%) or intermediate (5≥%) frequency:

$$\frac{\text{coding SNP low}}{\text{non-coding SNP low}} \quad \left| \quad \frac{\text{coding SNP intermediate}}{\text{non-coding SNP intermediate}}\right.$$

420 Finally, we calculated the unfolded Site Frequency Spectrum (SFS) based on the order of  
421 appearance of genetic variants in the herbarium dataset. We then used the the Kolmogorov–Smirnov  
422 two-samples test and 10,000 bootstrap resampling using the R package Matching v. 4.9-2 (ref. (70)) to  
423 calculate whether the frequency spectrum was lower for coding SNPs than for other SNPs. Additionally,  
424 we also repeated these analyses comparing nonsynonymous and synonymous mutations.

## 425 **Association analysis**

426 We collected flowering, seed and root morphology phenotypes for 63 accessions (Supplementary Text  
427 8). For associations with climate parameters, we followed a similar rationale as previously described  
428 (71). We extracted information from the bioclim database (<http://www.worldclim.org/bioclim>) at a 2.5

429 degrees resolution raster and intersected it with geographic locations of HPGI samples ( $n = 100$ ). We  
430 performed association analyses under several models and  $p$ -value corrections using the R package  
431 GeneABEL (72) (Supplementary Text 8.2). To calculate the variance of the trait explained by all genetic  
432 variants, we used a linear mixed model:  $y = Xb + Zu + \varepsilon$ ; where  $y$  is the phenotype or climate variable,  
433  $X$  is the genotype states at a given SNP,  $b$  is the fixed phenotypic effect of such SNP,  $Z$  is the design  
434 matrix of genome identities,  $u$  is the random genome background effect informed by the kinship matrix  
435 and distributed as  $MVN(0, \sigma_g^2 A)$ , and  $\varepsilon$  is the random error term. The ratio of  $\sigma_g / \sigma_T$  is commonly  
436 called narrow sense heritability, “chip” heritability, or proportion of variance explained by genotype (73).  
437 Only SNPs with  $MAF > 5\%$  ( $n=391$ ) were used to build a kinship or relationship matrix  $A$ . Note that the  
438 differences between any two genotypes were of the order of one or few dozens of SNPs. While this  
439 approach is appropriate to calculate a chip heritability, it would not be very useful to detect significant  
440 SNP, as the random factor accumulates all the available variation (Table S4). We therefore run regular  
441 GWA model without kinship matrix:  $y = Xb + \varepsilon$ ; but generated a  $p$ -value empirical null distribution  
442 based on running such model over 1,000 permuted datasets, which lead to conservative significance  
443 calculation (Fig. S6, Data Appendix S1). The  $p$ -values from running the association in the real data that  
444 were below the 5% tail in the empirical distribution could be considered significant. However, we also  
445 established a conservative “double” Bonferroni correction, where the significant threshold was lowered  
446 to 0.01% (= 5% / [number of SNPs + number of phenotypes tested]). All significant SNPs are shown in  
447 Table S5, and a subset in Table I. Although many phenotypic traits did not have significant SNPs, we  
448 show all the QQ plots in the Data Appendix S1 file.

449 **Accession numbers.** Short reads have been deposited in the European Nucleotide Archive under the  
450 accession number XXXXX.

451 **Online Content** This article contains supplementary information including data sets, extended  
452 methods and supplementary figures at xxx.

453 **Acknowledgments** For providing and retrieving herbarium specimens, we thank R. Capers, J. Devos,  
454 G. Shirsekar, M. S. Dossmann, J. Freudenstein, C. M. Herring, C. Niezgoda, C. A. McCormick, J. Peter  
455 and M. Thines. We thank X. Zhao and I. Henderson for recombination estimates, C. Lanz for sequencing  
456 support, C. Goeschl, B. Zierfuss and B. Wohlrab for help with root analyses, and P. Lang, D. Seymour,  
457 and D. Koenig for thorough proofreading and comments on the manuscript. We thank to Robert  
458 Colautti for useful comments on the theoretical framing of the manuscript, M. Nordborg for discussions  
459 and pointing us to the work of A.R. Templeton, K. Pruefer for input on data analysis, and the Weigel and  
460 Burbano labs for comments. Supported by the President's Fund of the Max Planck Society (project  
461 "Darwin"), ERC (AdG IMMUNEMESIS) and core funds of the Max Planck Society.

462 **Author Contributions** H.A.B. and D.W. conceived and supervised the project, and coordinated the  
463 collaborative effort. J.B. coordinated the collection of modern seed samples. C.J., B.B. and J.B. performed  
464 and analyzed flowering time and seed set greenhouse experiments. C.S. and R.S. performed and analyzed  
465 root assays and seed size measurements under the supervision of W.B.; C.B. and J.H. sequenced and  
466 curated modern samples, coordinated by D.W.; H.A.B. coordinated the collection and analysis of  
467 herbarium samples. J.K. coordinated the extraction of DNA and library preparation of herbarium  
468 samples. V.J.S. and E.R. prepared sequencing libraries from herbarium specimens. C.B. called variants in  
469 HPGI. J.H. called variants in mutation accumulation lines. M.E.A. performed the population and  
470 quantitative genomic analyses with supervision of R.N., C.B. and H.A.B. The first draft was written by  
471 M.E.A. and the final manuscript was written by M.E.A., C.B., H.A.B. and D.W. with comments from all  
472 coauthors.

473 Authors declare no conflict of interests.

474

## REFERENCES

475

1. Green RE, Shapiro B. Human evolution: turning back the clock. *Curr Biol*. 2013 Apr 8;23(7):R286–8.

476

2. Crawford PHC, Hoagland BW. Can herbarium records be used to map alien species invasion and native species expansion over the past 100 years? *J Biogeogr*. 2009;36(4):651–61.

477

478

3. Colautti RI, Lau JA. Contemporary evolution during invasion: evidence for differentiation, natural selection, and local adaptation. *Mol Ecol*. 2015 May;24(9):1999–2017.

479

480

4. van Kleunen M, Dawson W, Essl F, Pergl J, Winter M, Weber E, et al. Global exchange and accumulation of non-native plants. *Nature*. 2015 Aug 19;525(7567):100–3.

481

482

5. Razanajatovo M, Maurel N, Dawson W, Essl F, Kreft H, Pergl J, et al. Plants capable of selfing are more likely to become naturalized. *Nat Commun*. 2016 Oct 31;7:13313.

483

484

6. Sax DF, Stachowicz JJ, Brown JH, Bruno JF, Dawson MN, Gaines SD, et al. Ecological and evolutionary insights from species invasions. *Trends Ecol Evol*. 2007 Sep;22(9):465–71.

485

486

7. Gauze GF. *The struggle for existence*. Baltimore: The Williams & Wilkins company; 1934. 192-192 p.

487

8. Hardouin EA, Tautz D. Increased mitochondrial mutation frequency after an island colonization: positive selection or accumulation of slightly deleterious mutations? *Biol Lett*. 2013 Apr 23;9(2):20121123.

488

489

9. Halligan DL, Keightley PD. Spontaneous mutation accumulation studies in evolutionary genetics. *Annu Rev Ecol Evol Syst*. 2009;40(1):151–72.

490

491

10. Roach JC, Glusman G, Smit AFA, Huff CD, Hubley R, Shannon PT, et al. Analysis of genetic inheritance in a family quartet by whole-genome sequencing. *Science*. 2010 Apr 30;328(5978):636–9.

492

493

11. Wolfe KH, Li WH, Sharp PM. Rates of nucleotide substitution vary greatly among plant mitochondrial, chloroplast, and nuclear DNAs. *Proc Natl Acad Sci U S A*. 1987 Dec;84(24):9054–8.

494

495

12. Leffler EM, Bullaughey K, Matute DR, Meyer WK, Ségurel L, Venkat A, et al. Revisiting an old riddle: what determines genetic diversity levels within species? *PLoS Biol*. 2012 Sep 11;10(9):e1001388.

496

497

13. Pennings PS, Hermisson J. Soft Sweeps II—Molecular Population Genetics of Adaptation from Recurrent Mutation or Migration. *Mol Biol Evol*. 2006 May 1;23(5):1076–84.

498

499

14. Karasov T, Messer PW, Petrov DA. Evidence that adaptation in *Drosophila* is not limited by mutation at single sites. *PLoS Genet*. 2010 Jun;6(6):e1000924.

500

501

15. Rouco M, López-Rodas V, Flores-Moya A, Costas E. Evolutionary changes in growth rate and toxin production in the cyanobacterium *Microcystis aeruginosa* under a scenario of eutrophication and temperature increase. *Microb Ecol*. 2011 Aug;62(2):265–73.

502

503

504

16. Scally A, Durbin R. Revising the human mutation rate: implications for understanding human evolution. *Nat Rev Genet*. 2012 Sep 11;13(10):745–53.

505

506

17. Estoup A, Ravigné V, Hufbauer R, Vitalis R, Gautier M, Facon B. Is There a Genetic Paradox of Biological Invasion? *Annu Rev Ecol Evol Syst*. 2016;47(1):51–72.

507

508

18. Barrett RDH, Schluter D. Adaptation from standing genetic variation. *Trends Ecol Evol*. 2008 Jan;23(1):38–44.

- 509 19. Dlugosch KM, Parker IM. Founding events in species invasions: genetic variation, adaptive evolution, and the  
510 role of multiple introductions. *Mol Ecol.* 2008 Jan;17(1):431–49.
- 511 20. Dlugosch KM, Anderson SR, Braasch J, Cang FA, Gillette HD. The devil is in the details: genetic variation in  
512 introduced populations and its contributions to invasion. *Mol Ecol.* 2015 May;24(9):2095–111.
- 513 21. 1001 Genomes Consortium. 1,135 genomes reveal the global pattern of polymorphism in *Arabidopsis*  
514 *thaliana*. *Cell.* 2016 Jun 9;166:481–91.
- 515 22. Durvasula A, Fulgione A, Gutaker RM, Alacakaptan SI, Flood PJ, Neto C, et al. African genomes illuminate the  
516 early history and transition to selfing in *Arabidopsis thaliana*. *Proceedings of the National Academy of Sciences*  
517 [Internet]. 2017 May 4; Available from: <http://www.pnas.org/content/early/2017/05/03/1616736114.abstract>
- 518 23. Platt A, Horton M, Huang YS, Li Y, Anastasio AE, Mulyati NW, et al. The scale of population structure in  
519 *Arabidopsis thaliana*. *PLoS Genet.* 2010 Feb;6(2):e1000843.
- 520 24. Weiß CL, Schuenemann VJ, Devos J, Shirsekar G, Reiter E, Gould BA, et al. Temporal patterns of damage and  
521 decay kinetics of DNA retrieved from plant herbarium specimens. *Royal Society Open Science.* 2016 Jun  
522 1;3(6):160239.
- 523 25. Hagmann J, Becker C, Müller J, Stegle O, Meyer RC, Wang G, et al. Century-scale methylome stability in a  
524 recently diverged *Arabidopsis thaliana* lineage. *PLoS Genet.* 2015;11(1):e1004920–e1004920.
- 525 26. Choi K, Zhao X, Kelly KA, Venn O, Higgins JD, Yelina NE, et al. *Arabidopsis* meiotic crossover hot spots  
526 overlap with H2A.Z nucleosomes at gene promoters. *Nat Genet.* 2013 Nov;45(11):1327–36.
- 527 27. Bomblies K, Yant L, Laitinen R a., Kim S-T, Hollister JD, Warthmann N, et al. Local-scale patterns of genetic  
528 variability, outcrossing, and spatial structure in natural stands of *Arabidopsis thaliana*. *PLoS Genet.* 2010  
529 Mar;6(3):e1000890–e1000890.
- 530 28. Barrick JE, Lenski RE. Genome dynamics during experimental evolution. *Nat Rev Genet.* 2013  
531 Dec;14(12):827–39.
- 532 29. Kimura M. On the evolutionary adjustment of spontaneous mutation rates. *Genet Res.* 1967 Apr;9(01):23–23.
- 533 30. Drummond A, Pybus OG, Rambaut A. Inference of viral evolutionary rates from molecular sequences. *Adv*  
534 *Parasitol.* 2003;54:331–58.
- 535 31. Fu Q, Li H, Moorjani P, Jay F, Slepchenko SM, Bondarev AA, et al. Genome sequence of a 45,000-year-old  
536 modern human from western Siberia. *Nature.* 2014 Oct 23;514(7523):445–9.
- 537 32. Ness RW, Morgan AD, Colegrave N, Keightley PD. Estimate of the spontaneous mutation rate in  
538 *Chlamydomonas reinhardtii*. *Genetics.* 2012 Dec;192(4):1447–54.
- 539 33. Drummond AJ, Rambaut A. BEAST: Bayesian evolutionary analysis by sampling trees. *BMC Evol Biol.* 2007  
540 Jan;7:214–214.
- 541 34. Millar CD, Dodd A, Anderson J, Gibb GC, Ritchie PA, Baroni C, et al. Mutation and evolutionary rates in  
542 adélie penguins from the antarctic. *PLoS Genet.* 2008 Oct 3;4(10):e1000209.
- 543 35. Christin P-A, Spriggs E, Osborne CP, Strömberg CAE, Salamin N, Edwards EJ. Molecular dating, evolutionary  
544 rates, and the age of the grasses. *Syst Biol.* 2014 Mar;63(2):153–65.
- 545 36. Klein Goldewijk K, Ramankutty N. Land cover change over the last three centuries due to human activities:  
546 The availability of new global data sets. *Geojournal.* 2004;61(4):335–44.

- 547 37. Falahati-Anbaran M, Lundemo S, Stenøien HK. Seed dispersal in time can counteract the effect of gene flow  
548 between natural populations of *Arabidopsis thaliana*. *New Phytol.* 2014 May;202(3):1043–54.
- 549 38. Ossowski S, Schneeberger K, Lucas-Lledó JI, Warthmann N, Clark RM, Shaw RG, et al. The rate and  
550 molecular spectrum of spontaneous mutations in *Arabidopsis thaliana*. *Science.* 2010 Jan 1;327(5961):92–4.
- 551 39. Cao J, Schneeberger K, Ossowski S, Günther T, Bender S, Fitz J, et al. Whole-genome sequencing of multiple  
552 *Arabidopsis thaliana* populations. *Nat Genet.* 2011 Oct;43(10):956–63.
- 553 40. Ho SYW, Lanfear R, Bromham L, Phillips MJ, Soubrier J, Rodrigo AG, et al. Time-dependent rates of  
554 molecular evolution. *Mol Ecol.* 2011 Aug;20(15):3087–101.
- 555 41. Charlesworth B, Charlesworth D. *Elements of Evolutionary Genetics*. Roberts and Company Publishers; 2010.
- 556 42. Bush WS, Moore JH. Chapter 11: Genome-wide association studies. *PLoS Comput Biol.* 2012 Dec  
557 27;8(12):e1002822.
- 558 43. van Kleunen M, Dawson W, Maurel N. Characteristics of successful alien plants. *Mol Ecol.* 2015  
559 May;24(9):1954–68.
- 560 44. Templeton AR, Sing CF, Kessling A, Humphries S. A cladistic analysis of phenotype associations with  
561 haplotypes inferred from restriction endonuclease mapping. II. The analysis of natural populations. *Genetics.*  
562 1988 Dec;120(4):1145–54.
- 563 45. Grantham R. Amino acid difference formula to help explain protein evolution. *Science.* 1974 Sep  
564 6;185(4154):862–4.
- 565 46. Kim S, Choi H-I, Ryu H-J, Park JH, Kim MD, Kim SY. ARIA, an *Arabidopsis* arm repeat protein interacting  
566 with a transcriptional regulator of abscisic acid-responsive gene expression, is a novel abscisic acid signaling  
567 component. *Plant Physiol.* 2004 Nov;136(3):3639–48.
- 568 47. Li G, Boudsocq M, Hem S, Vialaret J, Rossignol M, Maurel C, et al. The calcium-dependent protein kinase  
569 CPK7 acts on root hydraulic conductivity. *Plant Cell Environ.* 2015 Jul;38(7):1312–20.
- 570 48. Choi H-I, Park H-J, Park JH, Kim S, Im M-Y, Seo H-H, et al. *Arabidopsis* calcium-dependent protein kinase  
571 AtCPK32 interacts with ABF4, a transcriptional regulator of abscisic acid-responsive gene expression, and  
572 modulates its activity. *Plant Physiol.* 2005 Dec;139(4):1750–61.
- 573 49. Franks SJ, Weis AE. A change in climate causes rapid evolution of multiple life-history traits and their  
574 interactions in an annual plant. *J Evol Biol.* 2008 Sep;21(5):1321–34.
- 575 50. Arunkumar R, Ness RW, Wright SI, Barrett SCH. The evolution of selfing is accompanied by reduced efficacy  
576 of selection and purging of deleterious mutations. *Genetics.* 2015 Mar;199(3):817–29.
- 577 51. Yoshida K, Schuenemann VJ, Cano LM, Pais M, Mishra B, Sharma R, et al. The rise and fall of the *Phytophthora*  
578 infestans lineage that triggered the Irish potato famine. *eLife.* 2013 May 28;2:e00731.
- 579 52. Meyer M, Kircher M. Illumina sequencing library preparation for highly multiplexed target capture and  
580 sequencing. *Cold Spring Harb Protoc.* 2010 Jun;2010(6):db.prot5448.
- 581 53. Briggs AW, Stenzel U, Meyer M, Krause J, Kircher M, Pääbo S. Removal of deaminated cytosines and  
582 detection of in vivo methylation in ancient DNA. *Nucleic Acids Res.* 2010 Apr;38(6):e87.
- 583 54. Kircher M. Analysis of High-Throughput Ancient DNA Sequencing Data. In: Shapiro B, Hofreiter M, editors.  
584 *Ancient DNA*. Humana Press; 2011. p. 197–228. (Methods in Molecular Biology).



- 585 55. Ossowski S, Schneeberger K, Clark RM, Lanz C, Warthmann N, Weigel D. Sequencing of natural strains of  
586 *Arabidopsis thaliana* with short reads. *Genome Res.* 2008 Dec;18(12):2024–33.
- 587 56. Schneeberger K, Hagemann J, Ossowski S, Warthmann N, Gesing S, Kohlbacher O, et al. Simultaneous  
588 alignment of short reads against multiple genomes. *Genome Biol.* 2009 Sep 17;10(9):R98.
- 589 57. Becker C, Hagemann J, Müller J, Koenig D, Stegle O, Borgwardt K, et al. Spontaneous epigenetic variation in  
590 the *Arabidopsis thaliana* methylome. *Nature.* 2011 Dec 8;480(7376):245–9.
- 591 58. Shaw RG, Byers DL, Darmo E. Spontaneous mutational effects on reproductive traits of *arabidopsis thaliana*.  
592 *Genetics.* 2000 May;155(1):369–78.
- 593 59. Jombart T. adegenet: a R package for the multivariate analysis of genetic markers. *Bioinformatics.* 2008 Jun  
594 1;24(11):1403–5.
- 595 60. Paradis E, Claude J, Strimmer K. APE: Analyses of Phylogenetics and Evolution in R language. *Bioinformatics.*  
596 2004 Jan 22;20(2):289–90.
- 597 61. Paradis E. pegas: an R package for population genetics with an integrated–modular approach. *Bioinformatics.*  
598 2010 Feb 1;26(3):419–20.
- 599 62. Huson DH, Bryant D. Application of phylogenetic networks in evolutionary studies. *Mol Biol Evol.* 2006  
600 Feb;23(2):254–67.
- 601 63. Drummond AJ, Suchard MA, Xie D, Rambaut A. Bayesian phylogenetics with BEAUti and the BEAST 1.7. *Mol*  
602 *Biol Evol.* 2012 Aug;29(8):1969–73.
- 603 64. Watterson GA. On the number of segregating sites in genetical models without recombination. *Theor Popul*  
604 *Biol.* 1975 Apr;7(2):256–76.
- 605 65. Tajima F. Statistical method for testing the neutral mutation hypothesis by DNA polymorphism. *Genetics.*  
606 1989 Nov 1;123(3):585–95.
- 607 66. Librado P, Rozas J. DnaSP v5: a software for comprehensive analysis of DNA polymorphism data.  
608 *Bioinformatics.* 2009 Jun 1;25(11):1451–2.
- 609 67. Fu Q, Mittnik A, Johnson PLF, Bos K, Lari M, Bollongino R, et al. A revised timescale for human evolution  
610 based on ancient mitochondrial genomes. *Curr Biol.* 2013 Apr;23(7):553–9.
- 611 68. Gill MS, Lemey P, Faria NR, Rambaut A, Shapiro B, Suchard M a. Improving Bayesian population dynamics  
612 inference: a coalescent-based model for multiple loci. *Mol Biol Evol.* 2012 Mar;30(3):713–24.
- 613 69. R Core Team. R: A Language and Environment for Statistical Computing [Internet]. Vienna, Austria: R  
614 Foundation for Statistical Computing; 2016. Available from: <https://www.R-project.org/>
- 615 70. Sekhon JS. Multivariate and Propensity Score Matching Software with Automated Balance Optimization: The  
616 Matching Package for R [Internet]. Vol. 42, *Journal of Statistical Software.* 2011. p. 1–52. Available from:  
617 <http://www.jstatsoft.org/v42/i07/>
- 618 71. Hancock AM, Brachi B, Faure N, Horton MW, Jarymowycz LB, Sperone FG, et al. Adaptation to climate  
619 across the *Arabidopsis thaliana* genome. *Science.* 2011 Oct;334(6052):83–6.
- 620 72. Aulchenko YS, Ripke S, Isaacs A, van Duijn CM. GenABEL: an R library for genome-wide association analysis.  
621 *Bioinformatics.* 2007 May 15;23(10):1294–6.
- 622 73. Yang J, Benyamin B, McEvoy BP, Gordon S, Henders AK, Nyholt DR, et al. Common SNPs explain a large

623 proportion of the heritability for human height. Nat Genet. 2010 Jun 20;42(7):565–9.

624 **TABLES**

625 **Table 1. Genic SNPs associated with different traits.**

626 For nonsynonymous SNPs, the amino acid change and the Grantham score (ranging from 0 to 215),  
 627 which measures the physico-chemical properties of the amino acids, are reported. All SNPs in the table  
 628 were significant ( $p < 0.05$ ) after raw p-values were corrected by an empirical p-value distribution from a  
 629 permutation procedure. \* highlights those that also passed a double Bonferroni threshold, correcting by  
 630 number of SNPs and number of phenotypes ( $p < 0.0001$ ). LD corresponds to how many other SNP hits  
 631 are in high linkage ( $r^2 > 0.5$ ). Table S5 contains information on all significant SNPs and Table S4 for details  
 632 on phenotypes and climatic variables.

| Trait | Location     | Gene      | Anno-      | Protein                 | aa change | LD | Bonf. |
|-------|--------------|-----------|------------|-------------------------|-----------|----|-------|
| †     | (chr-bp)     |           | tation     |                         |           |    |       |
| G     | 1-958,948    | AT1G03810 | nonsyn     | Oligonucleotide binding | A>P, 27   | 53 |       |
| D     | 1-13,994,958 | AT1G36933 | transposon | Copia                   |           | 49 |       |
| S     | 1-20,324,050 | AT1G54440 | intronic   | RRP6-LIKE I             |           | 11 | *     |
| D     | 1-23,648,407 | AT1G63740 | nonsyn     | TIR-NLR family          | Y>S, 144  | 46 |       |
| G     | 2-358,395    | AT2G01820 | syn        | RLK family              |           | 43 | *     |
| G     | 2-585,918    | AT2G02220 | syn        | PSKR I                  |           | 42 | *     |
| G     | 2-6,034,545  | AT2G14247 | syn        | Expressed protein       |           | 38 | *     |
| G     | 2-7,047,529  | AT2G16270 | nonsyn     | Unknown protein         | P>A, 27   | 37 | *     |
| G     | 2-7,186,220  | AT2G16580 | intronic   | SAUR8                   |           | 36 | *     |
| G     | 2-10,495,275 | AT2G24680 | intronic   | B3 family               |           | 34 | *     |

Exposito-Alonso, Becker et al.

*de novo* mutation rate in *A. thaliana*

|       |              |           |            |                         |          |    |   |
|-------|--------------|-----------|------------|-------------------------|----------|----|---|
| G     | 2-12,415,084 | AT2G28900 | intronic   | OEPI6                   |          | 32 |   |
| S     | 2-16,039,488 | AT2G38290 | 3' UTR     | AMT2                    |          | 8  | * |
| S     | 2-16,247,290 | AT2G38910 | nonsyn     | CPK20                   | A>G, 60  | 7  | * |
| G     | 2-16,333,662 | AT2G39160 | nonsyn     | Unknown protein         | A>G, 60  | 29 |   |
| G     | 3-2,500,258  | AT3G07830 | syn        | PGA3                    |          | 28 | * |
| G     | 3-3,629,794  | AT3G11530 | intronic   | VPS55                   |          | 26 | * |
| G     | 3-4,269,626  | AT3G13229 | 5' UTR     | DUF868 domain           |          | 25 | * |
| D     | 3-11,873,293 | AT3G30219 | transposon | Gypsy                   |          | 0  |   |
| G & D | 4-4,228,138  | AT4G07440 | transposon | Oligonucleotide binding |          | 19 |   |
| G & D | 4-9,046,942  | AT4G15960 | nonsyn     | Alpha/beta-hydrolase    | A>Q, 24  | 18 |   |
| G & D | 4-15,646,341 | AT4G32410 | syn        | ANY1                    |          | 15 |   |
| G     | 4-15,845,001 | AT4G32840 | 3' UTR     | PFK6                    |          | 14 |   |
| D     | 5-4,245,213  | AT5G13260 | syn        | Unknown protein         |          | 12 |   |
| D     | 5-4,500,202  | AT5G13950 | nonsyn     | Unknown protein         | A>G, 60  | 11 |   |
| G     | 5-4,797,923  | AT5G14830 | transposon | Retrotransposon         |          | 10 |   |
| G     | 5-6,508,329  | AT5G19330 | nonsyn     | ARIA                    | C>W, 215 | 0  |   |
| G     | 5-11,090,365 | AT5G29037 | transposon | Gypsy                   |          | 4  |   |
| G     | 5-12,312,975 | AT5G32630 | pseudogene | –                       |          | 3  |   |
| G     | 5-12,358,159 | AT5G32825 | transposon | CACTA                   |          | 2  |   |
| S     | 5-16,024,197 | AT5G40020 | intronic   | Thaumatin superfamily   |          | 2  | * |

845 † Traits with significant associations were root gravitropism (G), size (S), or low summer precipitation.

846 FIGURES

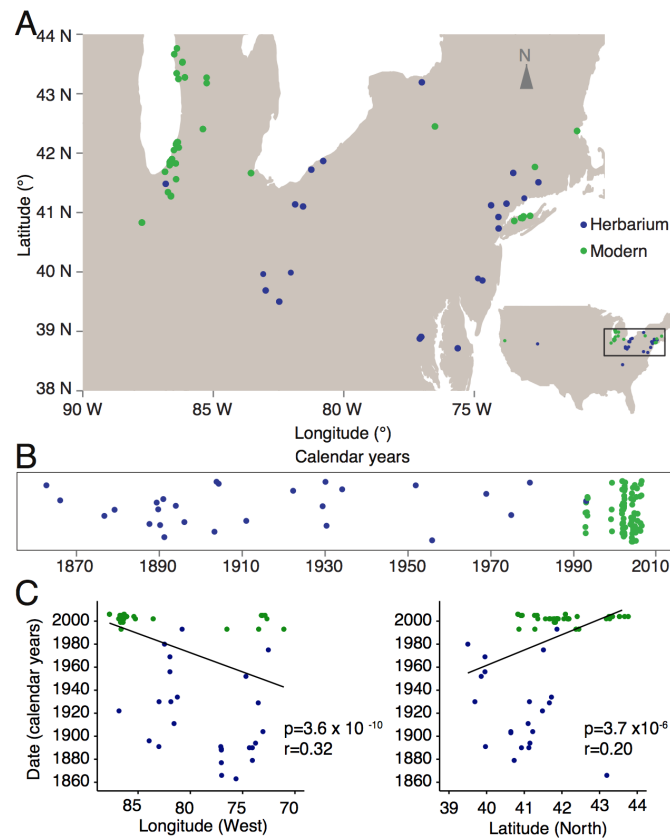

847 **Figure I. Geographic location and temporal distribution of HPGI samples.**

848 **(A)** Sampling locations of herbarium (blue) and modern individuals (green). **(B)** Temporal distribution of  
849 samples (random vertical jitter for visualization purposes). **(C)** Linear regression of longitude and  
850 longitude as a function of collection year (p-value of the slope and Pearson correlation coefficient are  
851 indicated).

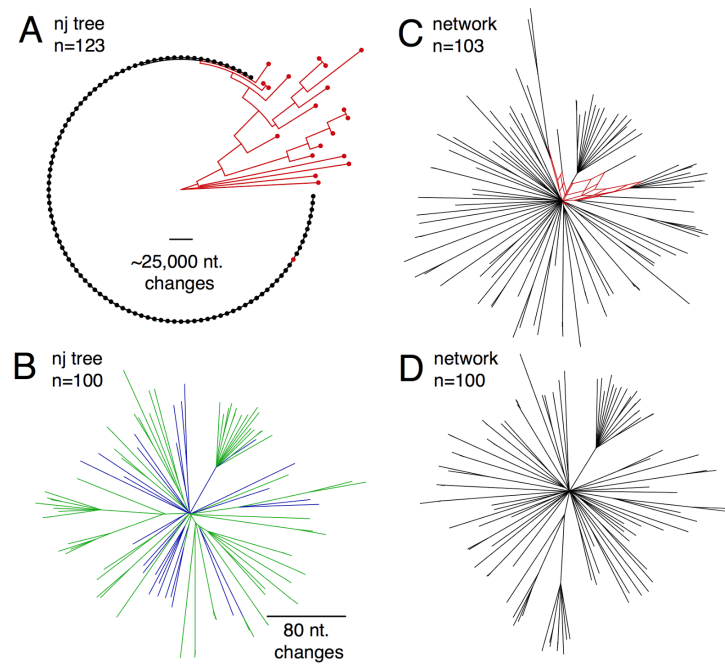

852 **Figure 2. Relationship among herbarium and modern samples.**

853 **(A)** Neighbor joining tree with all 123 samples (dots) and rooted with the most distant sample. The  
854 black clade of almost-identical samples is the HPGI lineage. Scale line shows the equivalent branch  
855 length of over 25,000 nucleotide changes. **(B)** Neighbor joining tree only with the HPGI black clade  
856 from **(A)**. Colors represent herbarium (blue) and modern individuals (green). Scale line shows the  
857 equivalent branch length of 80 nucleotide changes. Note that no outgroup was included. **(C, D)**  
858 Network of samples using the parsimony splits algorithm, before **(C)** and after **(D)** removing three  
859 intra-HPGI recombinants (in red). Note that the network algorithm returns in **(D)** a network devoid of  
860 any reticulation, which indicates absence of intra-haplogroup recombination.

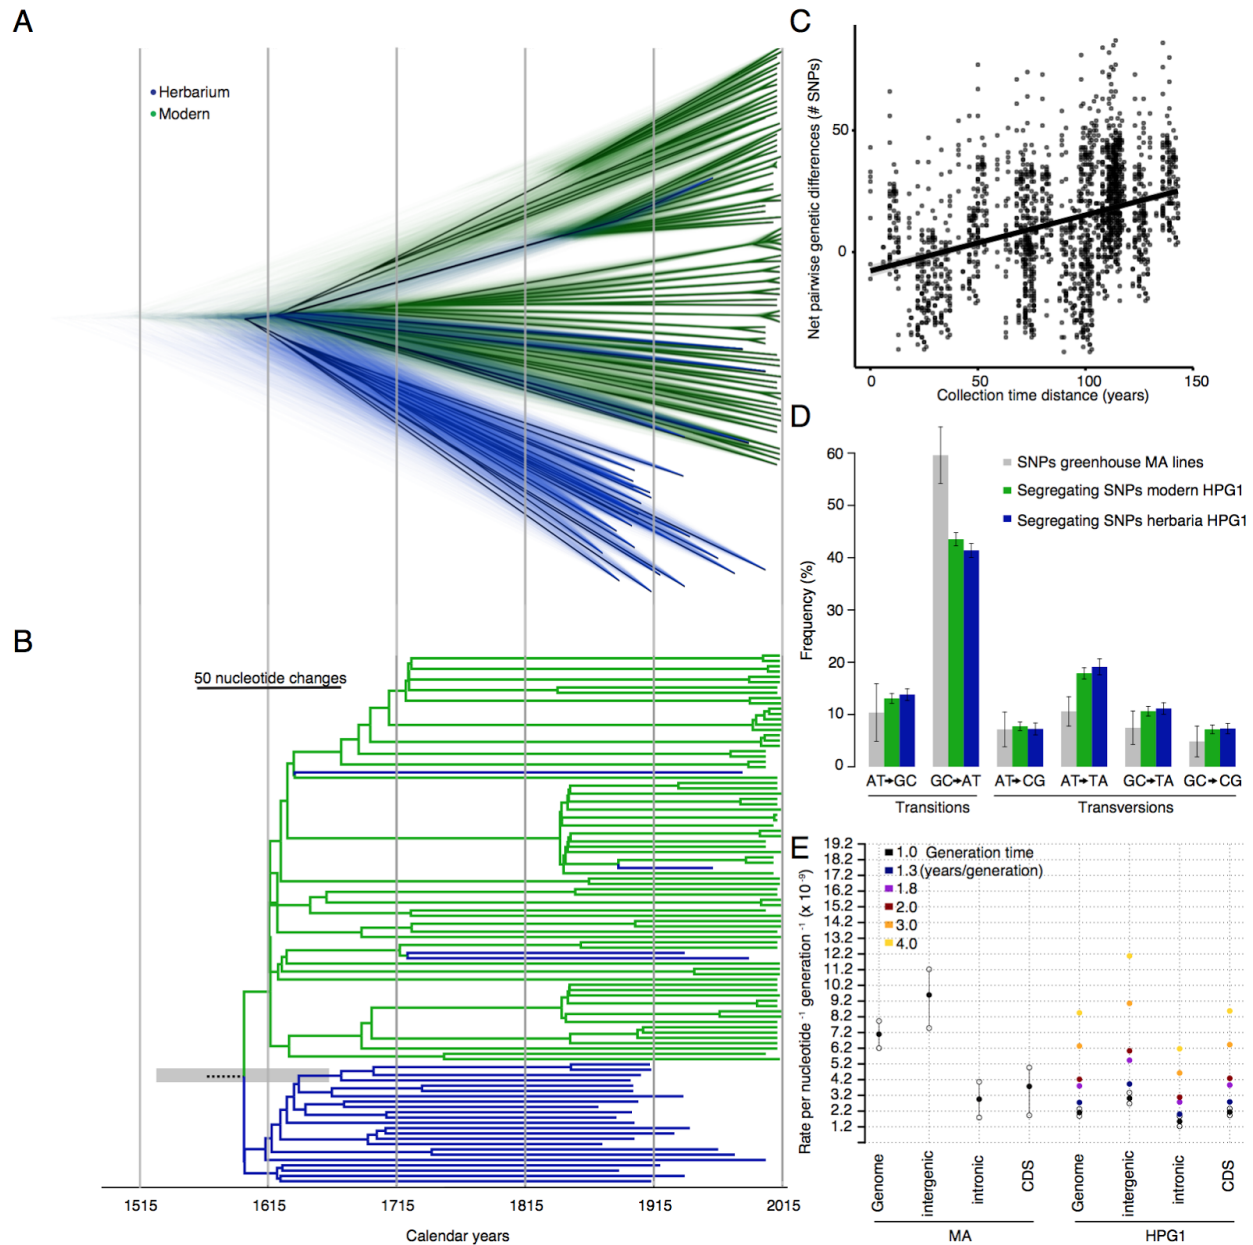

861

**Figure 3. Substitution rates.**

862 **(A)** Bayesian phylogenetic analyses employing tip-calibration. A total of 10,000 trees were superimposed  
 863 as transparent lines, and the most common topology was plotted solidly. Tree branches were calibrated  
 864 with their corresponding collection dates. **(B)** Maximum Clade Credibility (MCC) tree summarizing the



865 trees in (A). Note the scale line shows the equivalent branch length of 50 nucleotide changes. The grey  
866 transparent bar indicates the 95% Highest Posterior Probability of the root date. **(C)** Regression  
867 between pairwise net genetic and time distances. The slope of the linear regression line corresponds to  
868 the genome substitution rate per year. **(D)** Substitution spectra in HPGI samples, compared to  
869 greenhouse-grown mutation accumulation (MA) lines. **(E)** Comparison of genome-wide, intergenic,  
870 intronic, and genic substitution rates in HPGI and mutation rates in greenhouse-grown MA lines.  
871 Substitution rates for HPGI were re-scaled to a per generation basis assuming different generation  
872 times. Confidence intervals in HPGI substitution rates were obtained from 95% confidence intervals of  
873 the slope from 1,000 bootstraps (Table S4 for actual values).

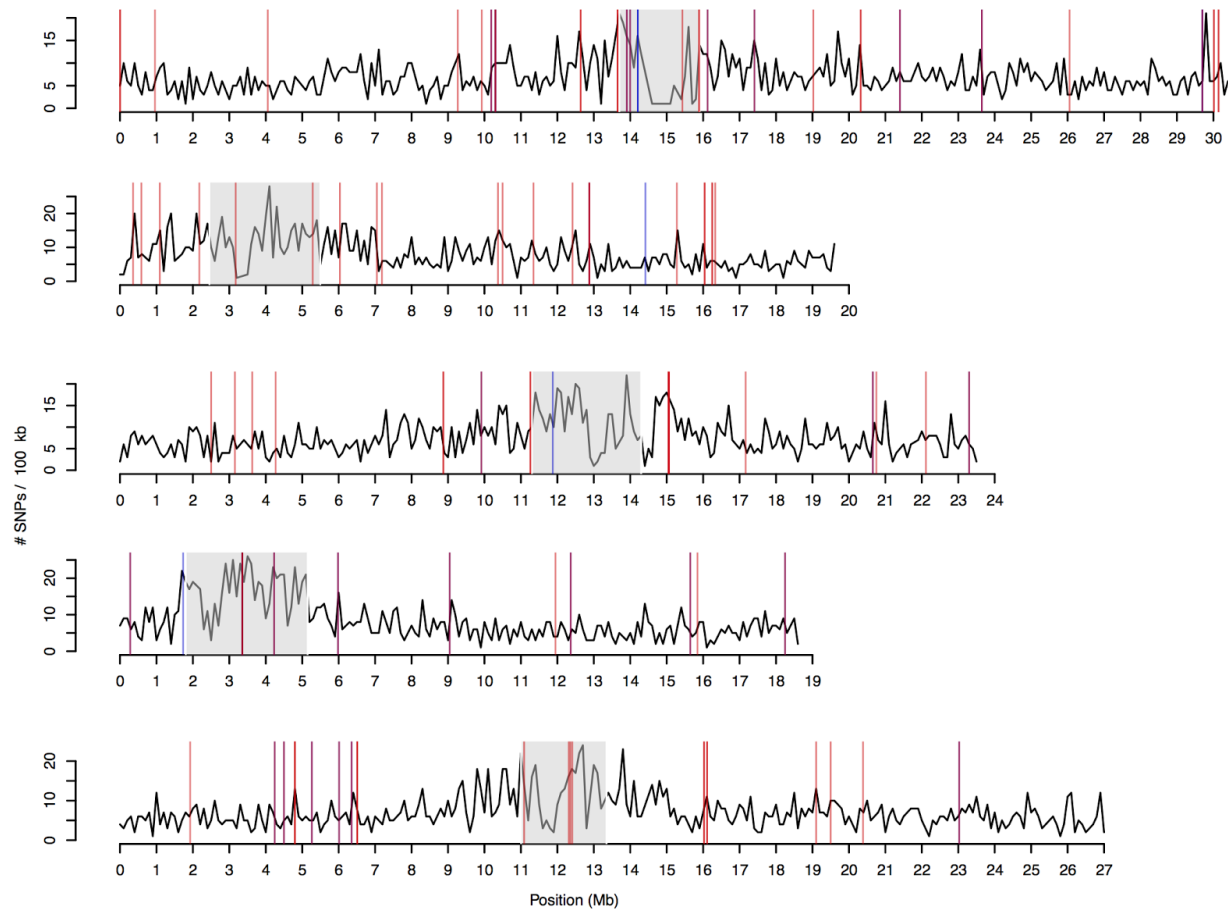

874 **Figure 4. Density of SNPs along all chromosomes and location of GWAS hits**  
875 Black line shows number of SNPs per 100 kb window. Centromere locations are indicated by grey  
876 shading. Vertical lines indicate SNPs associated with root phenotypes (red) and climatic variables (blue)  
877 (Table I and Table S5).

1 **Supplemental Information for Exposito-Alonso, Becker et al.:**

2 **The rate and potential relevance of new mutations in a colonizing**  
3 **plant lineage**

4 **SUPPLEMENTAL TEXT** **3**

- 5 1. Sample collection and preparation 3  
6 2. Authenticity of aDNA 3  
7 3. SNP calling thresholds 3  
8 4. Resequencing of Col-0 Mutation Accumulation lines 3  
9 5. Identification of bona fide HPGI accessions and mutations 4  
10 5.1 HPGI and other haplogroups in North America 4  
11 5.2 North american private diversity 4  
12 6. Extent of linkage disequilibrium and recombination 5  
13 7. Substitution and mutation rate analyses 6  
14 7.1 Greenhouse grown MA lines 6  
15 7.2 Natural populations of HPGI 6  
16 7.2.1 Net distances 6  
17 7.2.2 Bayesian tip-calibration 7  
18 7.2.3 Methylation status of mutated sites 7  
19 8. Phenotypic association analyses and dating of newly arisen mutations 8  
20 8.1. Phenotyping 8  
21 8.1.1 Root 8  
22 8.1.2 Seed size 8  
23 8.1.3 Flowering in the growth chamber 9  
24 8.1.4 Fecundity in the field 9  
25 8.2 Quantitative genetic analyses 9  
26 8.2.1 Heritability 10  
27 8.2.2 Linear Models 10  
28 8.2.3 Evaluation of significance 11  
29 8.2.4 Context of de novo mutations associated with phenotypes 11  
30 8.2.5 Functional information 11  
31 8.2.6 Proof of concept examples 11

32 **SUPPLEMENTAL REFERENCES** **13**

33 **SUPPLEMENTAL TABLES** **14**

34 **SUPPLEMENTAL FIGURES** **15**

- 35 Figure S1. Ancient-DNA characteristics of unrepaired herbarium libraries. 15  
36 Figure S2. Separation between HPGI and other North American lineages. 16  
37 Figure S3. Substitution spectrum and rates. 17  
38 Figure S4. Relationship between methylation and substitutions. 19  
39 Figure S5. Comparison of Site Frequency Spectra across genomic annotations. 21

bioRxiv preprint doi: <https://doi.org/10.1101/050203>; this version posted October 5, 2017. The copyright holder for this preprint (which was not certified by peer review) is the author/funder, who has granted bioRxiv a license to display the preprint in perpetuity. It is made available under aCC-BY-NC-ND 4.0 International license.

|    |                                                                         |    |
|----|-------------------------------------------------------------------------|----|
| 40 | Figure S5. Spatial and temporal emergence of root-associated mutations. | 22 |
| 41 | Figure S6. Linkage disequilibrium of significant SNPs.                  | 23 |

bioRxiv preprint doi: <https://doi.org/10.1101/050203>; this version posted October 5, 2017. The copyright holder for this preprint (which was not certified by peer review) is the author/funder, who has granted bioRxiv a license to display the preprint in perpetuity. It is made available under aCC-BY-NC-ND 4.0 International license.

## 42 SUPPLEMENTAL TEXT

### 43 1. Sample collection and preparation

44 Seeds from modern accessions (Table S1) were bulked at the University of Chicago. Progeny for  
45 DNA extraction was grown at the Max Planck Institute for Developmental Biology. We used 2 to 8  
46 mm<sup>2</sup> of dried tissue for destructive sampling from the herbarium specimens (Table S1).

### 47 2. Authenticity of aDNA

48 First, unrepaired sequencing herbarium libraries were screened for authenticity by sequencing at low  
49 coverage on Illumina HiSeq 2500 or MiSeq instruments. To verify the DNA retrieved from historical  
50 samples of *A. thaliana* was authentic, we checked the percentage of endogenous DNA of the sample  
51 (Fig. S1A) as well as typical postmortem DNA damages: high fragmentation of DNA (Fig. S1B),  
52 enrichment of substitution from C to T at the first base pair (Fig. S1C) as well as purine enrichment  
53 at breakpoints of DNA fragments (Fig. S1D) (for details see (1)). Sequencing to produce the final  
54 genomes (101 bp paired end) was carried out on an Illumina HiSeq 2000 instrument after DNA  
55 repair by uracil-DNA glycosylase (2–4). For a detailed analysis of authenticity in a fraction of our  
56 samples, see Weiss et al. (1).

### 57 3. SNP calling thresholds

58 To assess the effect of SNP calling thresholds on the mutation rate, we employed three different  
59 SHORE v0.9.0 quality thresholds following previous work (see Table S4 from (5)): allowing at most  
60 one intermediate penalty in all strains (most stringent threshold; “32-32”); requesting that at least  
61 one strain had at most one intermediate penalty, while all others were allowed up to two high and  
62 one intermediate penalties (intermediate stringency, “32-15”); and finally allowing one high and one  
63 intermediate penalty for all strains (most lenient stringency, “24-24”). On top of that, we would  
64 either allow missing information per SNP in up to 50% of accessions, or request complete  
65 information (0% missing rate). Thus, the most rigorous case would be 32-32 quality and 0% missing  
66 rate, and the most relaxed 24-24 quality and 50% maximum missing rate. Substitution rate  
67 calculations (section 7.2) were done for datasets from all combinations of these quality parameters  
68 (Fig. S3), and we chose the regular 32\_15 quality threshold and complete information for the final  
69 estimate (Fig 3 C, E).

### 70 4. Resequencing of Col-0 Mutation Accumulation lines

71 We also sequenced the genomes of twelve greenhouse-grown mutation accumulation (MA) lines,  
72 including ten that had been sequenced at lower coverage before (5,6) (Table S2). We called SNPs,  
73 indels and structural variants (SVs), following the workflow and parameters described (7), but

bioRxiv preprint doi: <https://doi.org/10.1101/050203>; this version posted October 5, 2017. The copyright holder for this preprint (which was not certified by peer review) is the author/funder, who has granted bioRxiv a license to display the preprint in perpetuity. It is made available under aCC-BY-NC-ND 4.0 International license.

74 without iterations. This procedure resulted in 2,203 polymorphisms shared by all lines, indicating  
75 errors in the reference sequence (12% of variants replaced N's in the TAIR9 genome) or genetic  
76 differences in the founder plant of the MA population compared to the Col-0 reference genome. In  
77 addition, we identified 388 segregating variants across the twelve lines (Table S2), of which 350 were  
78 singletons. This analysis revealed on average 25.5 SNPs, 4.9 deletions and 3.2 insertions per MA line  
79 at the 31<sup>st</sup> generation (Table S2), compared to 19.6 SNPs, 2.4 deletions and 1.0 insertions previously  
80 detected in the 30<sup>th</sup> generation with shorter read length and lower read depth (8). The genome  
81 length accessed in this sequencing effort, 115,954,227 bp, was used to scale the number of point  
82 mutations to a rate of  $7.1 \times 10^{-9}$  mutations site<sup>-1</sup> generation<sup>-1</sup> (Table S3, Fig. 3E).

## 83 **5. Identification of *bona fide* HPGI accessions and mutations**

### 84 **5.1 HPGI and other haplogroups in North America**

85 The modern samples had been originally selected based on previous genotyping efforts of about  
86 2,000 N. American accessions with for 149 nuclear, intermediate-frequency SNPs. This work had  
87 pointed to there being a single haplogroup, HPGI, that was invariant at these 149 markers and that  
88 accounted for about half of N. American individuals genotyped (9). We extracted from the 123  
89 genomes we had completely sequenced the same 149 SNPs and built a neighbour joining tree (Fig.  
90 S1A). We also built the same tree with the whole-genome sequences (Fig. S1B), which was mostly in  
91 agreement with the 149 SNP tree.

92 The previous work had identified several other haplogroup in N. America (9). Not  
93 surprisingly, HPGI individuals outcross with other lineages, and this accounts for some of the  
94 individuals which we later removed, because they did not agree completely in all 149 markers with  
95 the HPGI consensus.

### 96 **5.2 North american private diversity**

97 Having identified these *bona fide* HPGI individuals, we wanted to confirm that the diversity has a  
98 legitimate origin from *de novo* mutations. For that we used the 1001 Genomes resource  
99 ([www.1001genomes.org](http://www.1001genomes.org)), which covers a sampling of populations from the native Eurasian and  
100 African range. Subsetting the genomes from this resource to only European accessions, and limiting  
101 the SNP set to those with  $\geq 1\%$  frequency of alternative alleles and a maximum of 50% missing data  
102 (the same quality rate as our HPGI SNP call), there were 300 variants out of all 5,181 HPGI variants  
103 that were also found in Europe or Asia (5.7%). Changing the maximum missing data to 10% we get a  
104 more conservative estimate of 1.8% overlap, while increasing the maximum missing data to 90%, we  
105 get the anti-conservative estimate of 6.5% overlap. Only one of the reported SNPs associated with  
106 phenotypes (see [Section 8](#)) was among these shared variants.

bioRxiv preprint doi: <https://doi.org/10.1101/050203>; this version posted October 5, 2017. The copyright holder for this preprint (which was not certified by peer review) is the author/funder, who has granted bioRxiv a license to display the preprint in perpetuity. It is made available under aCC-BY-NC-ND 4.0 International license.

107 There are several scenarios that can explain these shared SNPs. One is simply that there was  
108 not a single founding seed, but a few of closely related individuals coming from the native range.  
109 Other explanations are that parallel mutations occurred in North America and Eurasia, that HPGI  
110 individuals were reintroduced to Europe, or that reversion-mutation occurred in some HPGI  
111 individuals. The latter is not implausible given the large population size of the species and the fact  
112 that about 10% of all sites in the genome are SNPs in the 1001 Genomes collection. As explained in  
113 the main text, SNP sharing due to admixture with other lineages is extremely unlikely, as such cases  
114 should be evident as blocks of high SNP diversity along the genome (Fig. 4).

115 Finally, regarding chloroplast diversity, we did not find any SNP in the chloroplast of HPGI  
116 individuals. This is probably because chloroplast mutation rates are much slower (10) and because  
117 the founder colonizers actually came from a small batch of seeds from an identical mother  
118 (chloroplast diversity in the native range is of 2,842 SNPs (11)).

## 119 **6. Extent of linkage disequilibrium and recombination**

120 We estimated pairwise linkage disequilibrium (LD) between all possible combinations of informative  
121 sites, ignoring singletons, by computing  $r^2$ ,  $D$  and  $D'$  statistics. LD decay was estimated using a linear  
122 regression approach. Linkage disequilibrium parameter  $|D'|$  did not decay with physical distance  
123 (intercept = 0.99, slope = 0.00) among all SNP pairs. Indeed 99.975% of pairwise SNP comparisons  
124 had  $|D'|=1$  meaning that 99.975% of those comparisons only three out of the four possible gametes  
125 (ab, aB, Ab, AB) are found and thus mutation alone can explain their existence without the need of  
126 invoking recombination. In other words, such three gametes can be represented in a tree structure.  
127 LD and recombination related statistics were determined using DnaSP v5 (12).

## 128 **7. Substitution and mutation rate analyses**

### 129 7.1 Greenhouse grown MA lines

130 Mutation rates were estimated for each 31<sup>st</sup> generation greenhouse-grown MA line (5) as the  
131 number of mutations divided by the total bp length of the genome (or a given annotation) and by 31  
132 generations (the two MA lines with only three generations were excluded from this analysis). Mean  
133 and confidence intervals across lines are reported (Table S3). The genome length was determined as  
134 all base pairs with coverage higher or equal to 3, and a SHORE mapping quality score of at least 32 in  
135 one sample (Table S2).

bioRxiv preprint doi: <https://doi.org/10.1101/050203>; this version posted October 5, 2017. The copyright holder for this preprint (which was not certified by peer review) is the author/funder, who has granted bioRxiv a license to display the preprint in perpetuity. It is made available under aCC-BY-NC-ND 4.0 International license.

## 136 7.2 Natural populations of HPGI

### 137 *7.2.1 Net distances*

138 For the “net genetic distances” method, we computed confidence intervals of the *b* regression slope  
139 coefficient ( $D' = a+bT$ ) using a bootstrap with replacement of 1,000 samples to avoid over-confident  
140 confidence intervals due to lack of independence of points (13). We used either all SNPs or SNPs at  
141 specific annotations to calculate different substitution rates and scaled the slope into a per-base rate  
142 using all positions (of the given annotation) that passed alternative or reference call quality thresholds  
143 rather than using a single value of genome length (Table S3). For all annotations we calculated  
144 substitution rates with three quality thresholds and either full information per SNP or allowing a  
145 maximum of 50% missing accessions per SNP (see [Section 3](#) and Fig. S1C).

146 For some annotations substitution rates were not reliable. For instance, in 3' and 5' UTR  
147 regions, we did not have enough mutations (on average ~1 SNP difference between any pair), and  
148 thus do not report these regions' rates. We could also have less power to discover SNPs in  
149 annotations with extensive structural variation such as active transposable elements (14).  
150 Transposons, which comprise ~8% of the genome and ~19% of all the SNPs in greenhouse MA lines,  
151 had fewer SNPs called than expected in HPGI. This would explain the atypically low transposon  
152 substitution rate (Table S3). Therefore, transposon substitution rates in HPGI cannot be trusted.

### 153 *7.2.2 Bayesian tip-calibration*

154 For the second approach to estimate a substitution rate, the Bayesian phylogenetics tip-calibration  
155 approach, we performed systematic runs and chain convergence assessments of different  
156 demographic and molecular clock models. We found the Skygrid demographic model (15) and the  
157 lognormal relaxed molecular clock (16) the most appropriate models. Under a relaxed molecular  
158 clock, the substitution rate is allowed to vary across branches with a lognormal distribution. The  
159 prior used for molecular clock was a Continuous-Time Markov Chain (CTMC) (15,17). The analysis  
160 was carried out remotely at CIPRES PORTAL (v3.1 [www.phylo.org](http://www.phylo.org)) using uninformative priors. The  
161 run took about 1,344 CPU hours and performed 1,000 million steps in a Monte Carlo Markov Chain  
162 (MCMC), sampling every 100,000 steps. Burn-in was adjusted to 10% of the steps. To visualize the  
163 tree output we produced a Maximum Clade Credibility (MCC) tree with a minimum posterior  
164 probability threshold of 0.8 and a 10% burn-in using TreeAnnotator (part of BEAST package), and  
165 visualized the MCC tree using FigTree ([tree.bio.ed.ac.uk/software/figtree/](http://tree.bio.ed.ac.uk/software/figtree/)) (Fig. 3B). Additionally, we  
166 used DensiTree (18) to simultaneously draw the 10,000 BEAST trees with the highest posterior  
167 probability (Fig. 3A). Since all trees were drawn transparently, agreements in both topology and  
168 branch lengths appear as densely colored regions, while areas with little agreement appear lighter.



bioRxiv preprint doi: <https://doi.org/10.1101/050203>; this version posted October 5, 2017. The copyright holder for this preprint (which was not certified by peer review) is the author/funder, who has granted bioRxiv a license to display the preprint in perpetuity. It is made available under aCC-BY-NC-ND 4.0 International license.

### 169 7.2.3 Methylation status of mutated sites

170 As in many other species, the spectrum of *de novo* mutations in the greenhouse-grown *A. thaliana*  
171 MA lines is biased towards G:C→A:T transitions (8), leading to an inflated transition-to-transversion  
172 ratio (Ts/Tv). This bias is less pronounced in recent mutations in a Eurasian collection of natural  
173 accessions (Fig. 5A of (19) and in HPGI accessions (Fig. 3D). A recent multigenerational salt stress  
174 experiment in the greenhouse also showed a more balanced Ts/Tv (20). These findings indicate that  
175 less benign conditions might promote a lower Ts/Tv, and one possible cause are methylation  
176 patterns, known to change under different environments (21).

177 We interrogated the potential evolutionary role of cytosine methylation in the mutability of  
178 cytosine bases in the HPGI accessions. For reference DNA methylation data, we used previously  
179 generated bisulfite-sequencing data of HPGI strains (7) and of Col-0 MA lines (5), respectively. For  
180 both datasets, methylation status was calculated as the fraction of reads with methylated cytosines by  
181 the total number of reads at a certain cytosine position in the genome. Our rationale was that if  
182 methylation affected mutability, the degree of methylation at positions where we find a new mutation  
183 should be higher. To be sure that a given site in HPGI was a new mutation, we only considered  
184 positions for which we could determine that state by alignment to the *A. lyrata* genome (22). The  
185 “tested sites” were positions in HPGI that had a mutation both from *A. lyrata* and *A. thaliana* Col-0.  
186 These positions can be of two kinds, “fixed” if all HPGI individuals carry the alternative, or  
187 “segregating” if both reference and alternative alleles exist in HPGI. As control, “control set”, we  
188 used cytosine positions that did not vary across HPGI, *A. lyrata* and *A. thaliana*. To produce the  
189 methylation distribution of the control set we randomly chose 1,000 invariant cytosine positions. For  
190 the test sets, we averaged the methylation degree and compared it with the control distribution.

191 Ancestral cytosines with higher methylation in both *A. thaliana* Col-0 reference and HPGI  
192 pseudo-reference methylome datasets were more likely to mutate to thymines in HPGI (Fig. S2  
193 A-D). Additionally, the methylation degree at substitutions inside genes was higher in the HPGI  
194 methylome (Fig. S2 B,D). While some C→T changes could be explained by higher spontaneous  
195 deaminations known to happen more often at methylated cytosines, also C→A/G substitutions were  
196 more likely to have been methylated. If this process is common enough, the Ts/Tv ratio should  
197 decrease. We are far from understanding differences in Ts/Tv in natural and controlled conditions,  
198 but definitely methylation status seems to have a strong statistical connection with mutability.

bioRxiv preprint doi: <https://doi.org/10.1101/050203>; this version posted October 5, 2017. The copyright holder for this preprint (which was not certified by peer review) is the author/funder, who has granted bioRxiv a license to display the preprint in perpetuity. It is made available under aCC-BY-NC-ND 4.0 International license.

## 199 **8. Phenotypic association analyses and dating of newly arisen mutations**

### 200 **8.1. Phenotyping**

#### 201 *8.1.1 Root*

202 Fifteen root phenotypes were scored for  $\geq 10$  replicates per genotype over a time-series experiment  
203 at the Gregor Mendel Institute in Vienna, using image analysis as described in detail elsewhere (23).  
204 We used the means per genotypes and per time series for association analyses.

#### 205 *8.1.2 Seed size*

206 We spread the seeds of given genotypes on separate plastic square 12 x 12 cm Petri dishes. For  
207 faster image acquisition we used a cluster of eight Epson V600 scanners. The scanner cluster was  
208 operated by the BRAT Multiscan image acquisition tool  
209 ([www.gmi.oeaw.ac.at/research-groups/wolfgang-busch/resources/brat/](http://www.gmi.oeaw.ac.at/research-groups/wolfgang-busch/resources/brat/)). The resulting 1600 dpi images  
210 were analyzed in Fiji software. Scans were converted to 8-bit binary images, thresholded  
211 (parameters: setAutoThreshold("Default dark"); setThreshold(20, 255)) and particles analyzed  
212 (inclusion parameters: size=0.04-0.25 circularity=0.70-1.00). The 2D seed size was measured in  
213 square millimeters (parameters: distance=1600 known=25.4 pixel=1 unit=mm) for 2 plants per  
214 genotype, > 500 seeds per plant.

#### 215 *8.1.3 Flowering in the growth chamber*

216 We estimated the flowering time in growth chambers under four vernalization treatments (0, 14, 28  
217 and 63 days of vernalization). We grew 6 replicates per accession divided between two complete  
218 randomized blocks for each treatment. Seeds were sown on a 1:1 mixture of Premier Pro-Mix and  
219 MetroMix and cold stratified for 6 days (6°C, no light). We then let plants germinate and grow at  
220 18°C, 14 hours of light, 65% humidity. After 3 weeks, we transferred the plants to vernalization  
221 conditions (6°C, 8 hours of light, 65% humidity). After vernalization, plants were transferred back to  
222 long day conditions. Trays were rotated around the growth chambers every other day throughout  
223 the experiment, under both vernalization and ambient conditions. Germination, bolting and flowering  
224 dates were recorded every other day until all plants had flowered. Days till flowering or bolting times  
225 were calculated from the germination date until the first flower opened and until the first flower bud  
226 was developed, respectively. The average flowering time and bolting time per genotype were used for  
227 association analyses.

bioRxiv preprint doi: <https://doi.org/10.1101/050203>; this version posted October 5, 2017. The copyright holder for this preprint (which was not certified by peer review) is the author/funder, who has granted bioRxiv a license to display the preprint in perpetuity. It is made available under aCC-BY-NC-ND 4.0 International license.

#### 228 **8.1.4 Fecundity in the field**

229 To investigate variation in fecundity in natural conditions, we grew three replicates of each accession  
230 in a field experiment following a completely randomized block design. Seeds were sown from  
231 09/20/2012 to 09/22/2012 in 66-well trays (well diameter = 4 cm) on soil from the field site where  
232 plants were to be transplanted. The trays were cold stratified for seven days before being placed in a  
233 cold frame at the University of Chicago (outdoors, no additional light or heat, but watered as needed  
234 and protected from precipitation). Seedlings were transplanted directly into tilled ground at the  
235 Warren Wood field station (41.84° N., 86.63° W.), Michigan, USA on 10/13/2012 and 10/14/2012.  
236 Seedlings were watered-in and left to overwinter without further intervention. Upon maturation of  
237 all fruits, stems were harvested and stored between sheets of newsprint paper. To estimate the  
238 fecundity, stems were photographed on a black background and the size of each plant was estimated  
239 as the number of pixels occupied by the plant on the image. This measure correlates well with the  
240 total length of siliques produced, a classical estimator of fecundity in *A. thaliana* (Spearman's  
241  $\rho=0.84$ ,  $p$ -value<0.001, data not shown).

#### 242 **8.2 Quantitative genetic analyses**

243 For 63 modern accessions, we measured time to bolting and flowering, seeds per plant, seed size,  
244 and 15 root phenotypes in common chamber or common garden settings. For all 100 accessions,  
245 climatic information from the bioclim database ([www.worldclim.org/bioclim](http://www.worldclim.org/bioclim)) was extracted using  
246 their geographic coordinates. For historic samples, some locations were only known by county  
247 name. In this case we assigned the geographic coordinate location of the centroid of the county.

#### 248 **8.2.1 Heritability**

249 We performed association analyses using the R package GenABEL (24), with measured phenotypes  
250 ( $p = 25$ ) and climatic variables ( $c = 18$ ) as response variables and SNPs as explanatory variables. A  
251 Minimum Allele Frequency (MAF) cutoff of 5% was used. The number of assessed SNPs was 391 in a  
252 dataset of only modern samples but with imputed genotypes for missing data using Beagle v4.0 (25),  
253 and 456 SNPs with a dataset of modern and historic samples, without imputation. For all  
254 associations, at least 63 individuals were genotyped for a specific SNP. We first investigated broad  
255 sense heritability ( $H^2$ ) of each trait using ANOVA partition of variance between and within lines using  
256 replicates (Table S4). Significance was obtained by common F test in ANOVA. Secondly we used the  
257 *polygenic\_hglm* function to fit a genome wide kinship matrix to calculate a narrow sense heritability  
258 estimate ( $h^2$ ). This fits a model of the type  $y = Zu + \varepsilon$  (see Main text Methods). Significance was  
259 calculated employing a likelihood ratio test comparing with a null model. In principle,  $h^2$  is a  
260 component of  $H^2$ , then its values should theoretically be  $h^2 < H^2$ . That is not our case. Our result

bioRxiv preprint doi: <https://doi.org/10.1101/050203>; this version posted October 5, 2017. The copyright holder for this preprint (which was not certified by peer review) is the author/funder, who has granted bioRxiv a license to display the preprint in perpetuity. It is made available under aCC-BY-NC-ND 4.0 International license.

261 cannot be interpreted in this framework, since the calculation of both was not done with the same  
262 samples: for the  $h^2$  calculation we employed genotype means whereas for the  $H^2$  we used multiple  
263 replicated measurements per genotype. The averaging of replicates per genotype in  $h^2$  reduced  
264 environmental and developmental noise and thus we would expect  $h^2 > H^2$ . We did this so the climatic  
265 estimates of  $h^2$ , for which we only have one value per genotype, would be comparable with the  
266 phenotypic  $h^2$  ones (Table S4).

### 267 8.2.2 Linear Models

268 For association analyses we first employed a linear mixed model that fitted the kinship matrix using  
269 the *mmscore* function. This model is of the type:  $y = Xb + Zu + \varepsilon$  (see Main text Methods) (26).  
270 Only three significant SNP hits were discovered using a 5% significance threshold after False  
271 Discovery Rate correction (FDR). This was expected since we have few variants and these would  
272 have originated in an approximated phylogeny structure. We concluded that fitting the kinship matrix  
273 in our model was not appropriate since there would be no residual variation for association with  
274 specific SNPs. With this rationale we employed a fixed effects linear model using the *qtscore* function  
275 (27). This model is of the type:  $y = Xb + \varepsilon$ ; where no random effect of genome background is fit. To  
276 reduce the risk of having false-positives, we took a conservative permutation strategy by carrying out  
277 association with over 1,000 randomized datasets (permuting phenotypes across individuals) and used  
278 the resulting empirical p-value distribution to correct p-values estimated with the original dataset.  
279 SNPs with p-values below 5% in the empirical p-value distribution should be considered significant  
280 (but see next section). In climatic models, we included longitude and latitude as covariates to correct  
281 for any spurious association between SNPs and climate gradients created by the migratory pattern of  
282 isolation by distance.

### 283 8.2.3 Evaluation of significance

284 Significant SNPs were interspersed throughout the genome (Fig. 4) and their p-values and phenotypic  
285 effects did not correlate with the minimum age of the SNPs nor with their allele frequency,  
286 something that could have indicated that the significance was merely driven by the higher statistical  
287 power of intermediate frequency variants. Using QQ plots to assess inflation or deflation of p-values,  
288 we observed generally that permutation corrected p-values were deflated — another evidence of  
289 our conservative strategy. Straight horizontal series of points in QQ plots indicate that multiple  
290 SNPs have identical p-values, a pattern that we attributed to long range LD, i.e. lack of independence  
291 (see Data Appendix SI for trait distributions and QQ plots from each association analysis).

bioRxiv preprint doi: <https://doi.org/10.1101/050203>; this version posted October 5, 2017. The copyright holder for this preprint (which was not certified by peer review) is the author/funder, who has granted bioRxiv a license to display the preprint in perpetuity. It is made available under aCC-BY-NC-ND 4.0 International license.

292 To further ensure that we avoided false positive results, we also prioritized SNPs whose  
293 empirical p-value was not below 5% only but also below  $5\% / (\text{number of SNPs} + \text{number of traits}) =$   
294 0.01%. This “double” Bonferroni correction was very conservative (Table I, Table S5).

#### 295 *8.2.4 Context of de novo mutations associated with phenotypes*

296 For each SNP in our dataset, we determined the ancestral and derived states, by identifying which  
297 allele was found in the oldest herbarium samples. We compared the time of emergence and the  
298 centroid of geographic distribution of the alternative alleles of SNP hits to random draws of SNPs  
299 with the same MAF filtering (5%) (Fig. S1).

#### 300 *8.2.5 Functional information*

301 On top of phenotypic and climatic associations of SNP hits, we also provide a likely functional effect  
302 employing a commonly used amino acid matrix of biochemical effects (28). Functional information of  
303 gene name and ontology categorization of SNP hits was obtained from  
304 [www.arabidopsis.org/portals/genAnnotation/gene\\_structural\\_annotation/annotation\\_data.jsp](http://www.arabidopsis.org/portals/genAnnotation/gene_structural_annotation/annotation_data.jsp) and  
305 [www.arabidopsis.org/tools/bulk/go/](http://www.arabidopsis.org/tools/bulk/go/) (Table I and Table S5).

#### 306 *8.2.6 Proof of concept examples*

307 We argue that the power of our association approach relies on the fact that HPGI lines resemble  
308 Near Isogenic Lines (NILs) produced by experimental crosses (29) (Fig. S2A). Similar to  
309 genome-wide association studies (GWA), power depends on many factors, namely the noise of  
310 phenotype under study, architecture of phenotypic trait, quality of genotyping, population structure,  
311 sample diversity, sample size, allele frequency, and recombination. On one hand, association analyses  
312 in NILs suffer from large linkage blocks, but confident results can be achieved due to accurate  
313 measurement of phenotypes, limited genetic differences between any two lines, and high quality  
314 genotypes. In common GWA studies such as in humans, there are multiple confounding effects.  
315 Among the confounders are (1) that any two samples differ in hundreds of thousands of SNPs, and  
316 (2) that historical and geographic stratification produce non-random correlations among those SNP  
317 differences. This considerably complicates the identification of phenotypic effects at specific genes,  
318 and power relies greatly on large sample sizes to achieve the sufficient number of recombination  
319 between markers.

320 To provide support for the non-synonymous SNP on chromosome 5, at position 6,508,329  
321 in AT5G19330, we looked for pairs of lines that carry the ancestral and the derived allele, but that  
322 differ in few (or no other) SNPs in the genome. When considering all genic substitutions with a  
323 minimum allele frequency of 5% (Fig. S2A), we identified 20 pairs of lines differing only in the

bioRxiv preprint doi: <https://doi.org/10.1101/050203>; this version posted October 5, 2017. The copyright holder for this preprint (which was not certified by peer review) is the author/funder, who has granted bioRxiv a license to display the preprint in perpetuity. It is made available under aCC-BY-NC-ND 4.0 International license.

324 AT5G19330 SNP and another linked SNP (located on a different chromosome, association p-value >  
325 0.4). The phenotypic differences in mean gravitropic score of these almost-identical pairs were  
326 significantly higher than phenotypic differences among all pairs of HPG I lines, and genetically identical  
327 pairs attending to substitutions inside genes (Fig. S2A). Furthermore, this SNP was not in complete  
328 linkage with any other SNP hit ( $r^2 < 0.5$ ) (Fig. S2D). The same approach was used to examine the  
329 SNPs in AT1G54440 (Fig. S2E) and AT2G16580 (Fig. S2F), which represent an intermediate and a high  
330 LD example.

bioRxiv preprint doi: <https://doi.org/10.1101/050203>; this version posted October 5, 2017. The copyright holder for this preprint (which was not certified by peer review) is the author/funder, who has granted bioRxiv a license to display the preprint in perpetuity. It is made available under aCC-BY-NC-ND 4.0 International license.

331 **SUPPLEMENTAL REFERENCES**

- 332 1. Weiß CL, Schuenemann VJ, Devos J, Shirsekar G, Reiter E, Gould BA, et al. Temporal patterns  
333 of damage and decay kinetics of DNA retrieved from plant herbarium specimens. *Royal Society*  
334 *Open Science*. 2016 Jun 1;3(6):160239.
- 335 2. Meyer M, Kircher M. Illumina sequencing library preparation for highly multiplexed target  
336 capture and sequencing. *Cold Spring Harb Protoc*. 2010 Jun;2010(6):db.prot5448.
- 337 3. Briggs AW, Stenzel U, Meyer M, Krause J, Kircher M, Pääbo S. Removal of deaminated cytosines  
338 and detection of in vivo methylation in ancient DNA. *Nucleic Acids Res*. 2010 Apr;38(6):e87.
- 339 4. Kircher M. Analysis of High-Throughput Ancient DNA Sequencing Data. In: Shapiro B, Hofreiter  
340 M, editors. *Ancient DNA*. Humana Press; 2011. p. 197–228. (Methods in Molecular Biology).
- 341 5. Becker C, Hagemann J, Müller J, Koenig D, Stegle O, Borgwardt K, et al. Spontaneous epigenetic  
342 variation in the *Arabidopsis thaliana* methylome. *Nature*. 2011 Dec 8;480(7376):245–9.
- 343 6. Shaw RG, Byers DL, Darms E. Spontaneous mutational effects on reproductive traits of  
344 *Arabidopsis thaliana*. *Genetics*. 2000 May;155(1):369–78.
- 345 7. Hagemann J, Becker C, Müller J, Stegle O, Meyer RC, Wang G, et al. Century-scale methylome  
346 stability in a recently diverged *Arabidopsis thaliana* lineage. *PLoS Genet*.  
347 2015;11(1):e1004920–e1004920.
- 348 8. Ossowski S, Schneeberger K, Lucas-Lledó JI, Warthmann N, Clark RM, Shaw RG, et al. The rate  
349 and molecular spectrum of spontaneous mutations in *Arabidopsis thaliana*. *Science*. 2010 Jan  
350 1;327(5961):92–4.
- 351 9. Platt A, Horton M, Huang YS, Li Y, Anastasio AE, Mulyati NW, et al. The scale of population  
352 structure in *Arabidopsis thaliana*. *PLoS Genet*. 2010 Feb;6(2):e1000843.
- 353 10. Wolfe KH, Sharp PM, Li W-H. Rates of synonymous substitution in plant nuclear genes. *J Mol*  
354 *Evol*. 1989 Sep;29(3):208–11.
- 355 11. 1001 Genomes Consortium. 1,135 Genomes Reveal the Global Pattern of Polymorphism in  
356 *Arabidopsis thaliana*. *Cell*. 2016 Jul 14;166(2):481–91.
- 357 12. Librado P, Rozas J. DnaSP v5: a software for comprehensive analysis of DNA polymorphism  
358 data. *Bioinformatics*. 2009 Jun 1;25(11):1451–2.
- 359 13. Drummond A, Pybus OG, Rambaut A. Inference of viral evolutionary rates from molecular  
360 sequences. *Adv Parasitol*. 2003;54:331–58.
- 361 14. Treangen TJ, Salzberg SL. Repetitive DNA and next-generation sequencing: computational  
362 challenges and solutions. *Nat Rev Genet*. 2012 Jan;13(1):36–46.
- 363 15. Gill MS, Lemey P, Faria NR, Rambaut A, Shapiro B, Suchard M a. Improving Bayesian population  
364 dynamics inference: a coalescent-based model for multiple loci. *Mol Biol Evol*. 2012  
365 Mar;30(3):713–24.
- 366 16. Drummond AJ, Ho SYW, Phillips MJ, Rambaut A. Relaxed phylogenetics and dating with  
367 confidence. *PLoS Biol*. 2006 May;4(5):e88–e88.

bioRxiv preprint doi: <https://doi.org/10.1101/050203>; this version posted October 5, 2017. The copyright holder for this preprint (which was not certified by peer review) is the author/funder, who has granted bioRxiv a license to display the preprint in perpetuity. It is made available under aCC-BY-NC-ND 4.0 International license.

- 368 17. Ferreira M a. R, Suchard M a. Bayesian analysis of elapsed times in continuous-time Markov  
369 chains. *Can J Stat.* 2008 Sep;36(3):355–68.
- 370 18. Bouckaert RR. DensiTree: making sense of sets of phylogenetic trees. *Bioinformatics.* 2010 May  
371 15;26(10):1372–3.
- 372 19. Cao J, Schneeberger K, Ossowski S, Günther T, Bender S, Fitz J, et al. Whole-genome  
373 sequencing of multiple *Arabidopsis thaliana* populations. *Nat Genet.* 2011 Oct;43(10):956–63.
- 374 20. Jiang C, Mithani A, Belfield EJ, Mott R, Hurst LD, Harberd NP. Environmentally responsive  
375 genome-wide accumulation of de novo *Arabidopsis thaliana* mutations and epimutations.  
376 *Genome Res.* 2014 Nov;24(11):1821–9.
- 377 21. Wibowo A, Becker C, Marconi G, Durr J, Price J, Hagemann J, et al. Hyperosmotic stress  
378 memory in *Arabidopsis* is mediated by distinct epigenetically labile sites in the genome and is  
379 restricted in the male germline by DNA glycosylase activity. *eLife.* 2016 May 31;5:e13546.
- 380 22. Hu TT, Pattyn P, Bakker EG, Cao J, Cheng J-F, Clark RM, et al. The *Arabidopsis lyrata* genome  
381 sequence and the basis of rapid genome size change. *Nat Genet.* 2011 May;43(5):476–81.
- 382 23. Slovak R, Göschl C, Su X, Shimotani K, Shiina T, Busch W. A scalable open-source pipeline for  
383 large-scale root phenotyping of *Arabidopsis*. *Plant Cell.* 2014 Jun 10;26(6):2390–403.
- 384 24. Aulchenko YS, Ripke S, Isaacs A, van Duijn CM. GenABEL: an R library for genome-wide  
385 association analysis. *Bioinformatics.* 2007 May 15;23(10):1294–6.
- 386 25. Browning BL, Browning SR. Genotype Imputation with Millions of Reference Samples. *Am J*  
387 *Hum Genet.* 2016 Jan 7;98(1):116–26.
- 388 26. Wilson AJ, Réale D, Clements MN, Morrissey MM, Postma E, Walling CA, et al. An ecologist's  
389 guide to the animal model. *J Anim Ecol.* 2010 Jan;79(1):13–26.
- 390 27. Aulchenko YS, de Koning D-J, Haley C. Genomewide rapid association using mixed model and  
391 regression: a fast and simple method for genomewide pedigree-based quantitative trait loci  
392 association analysis. *Genetics.* 2007 Sep;177(1):577–85.
- 393 28. Grantham R. Amino acid difference formula to help explain protein evolution. *Science.* 1974 Sep  
394 6;185(4154):862–4.
- 395 29. Weigel D. Natural variation in *Arabidopsis*: from molecular genetics to ecological genomics.  
396 *Plant Physiol.* 2012 Jan;158(1):2–22.



bioRxiv preprint doi: <https://doi.org/10.1101/050203>; this version posted October 5, 2017. The copyright holder for this preprint (which was not certified by peer review) is the author/funder, who has granted bioRxiv a license to display the preprint in perpetuity. It is made available under aCC-BY-NC-ND 4.0 International license.

397 **SUPPLEMENTAL TABLES**

398 **Table S1.** HPGI sample information.

399 **Table S2.** Sample information for Col-0 mutation accumulation lines.

400 **Table S3.** Mutation rate estimates for different annotations in HPGI and mutation accumulation  
401 lines.

402 **Table S4.** Description of phenotypic and climatic variables for association mapping analyses.

403 **Table S5.** SNP hits from association analyses and several descriptors.

404 **Data Appendix S1:** For each trait employed in association analyses, we report the histogram  
405 distribution and the QQ plot of p-values to ensure that no trait departs exaggeratedly from the  
406 normal distribution, and that no inflation of p-values is observed (when  $\lambda \leq 1$ , there is no  
407 inflation of false positives).

bioRxiv preprint doi: <https://doi.org/10.1101/050203>; this version posted October 5, 2017. The copyright holder for this preprint (which was not certified by peer review) is the author/funder, who has granted bioRxiv a license to display the preprint in perpetuity. It is made available under aCC-BY-NC-ND 4.0 International license.

408

**SUPPLEMENTAL FIGURES**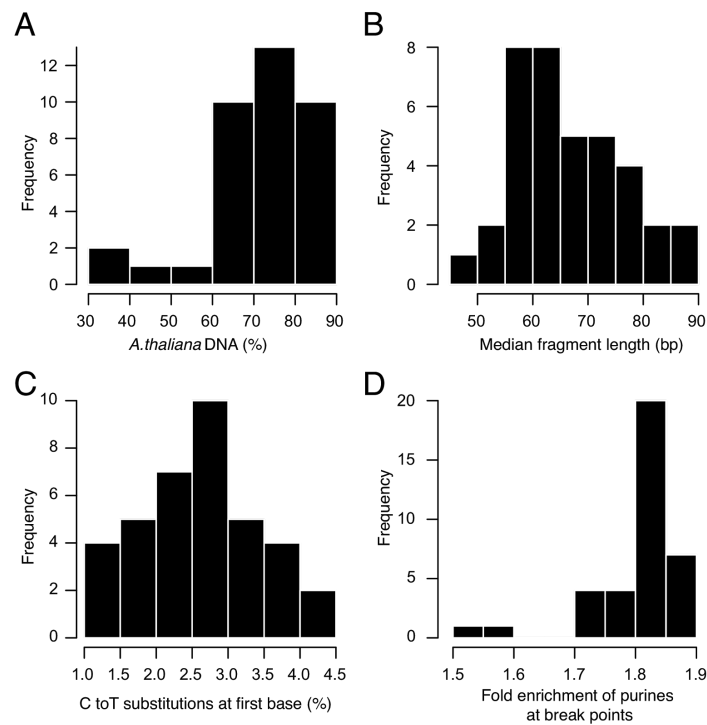

409 **Fig S1. Ancient-DNA characteristics of unrepaired herbarium libraries.**

410 **(A)** Fraction of *A. thaliana* DNA in sample. **(B)** Median length of merged reads. **(C)** Fraction of  
 411 cytosine to thymine (C-to-T) substitutions at first base (5' end). **(D)** Relative enrichment of purines  
 412 (adenine and guanine) at 5' end breaking points. Position -1 is compared with position -5 (negative  
 413 numbers indicate genomic context before upstream reads' 5' end).

bioRxiv preprint doi: <https://doi.org/10.1101/050203>; this version posted October 5, 2017. The copyright holder for this preprint (which was not certified by peer review) is the author/funder, who has granted bioRxiv a license to display the preprint in perpetuity. It is made available under aCC-BY-NC-ND 4.0 International license.

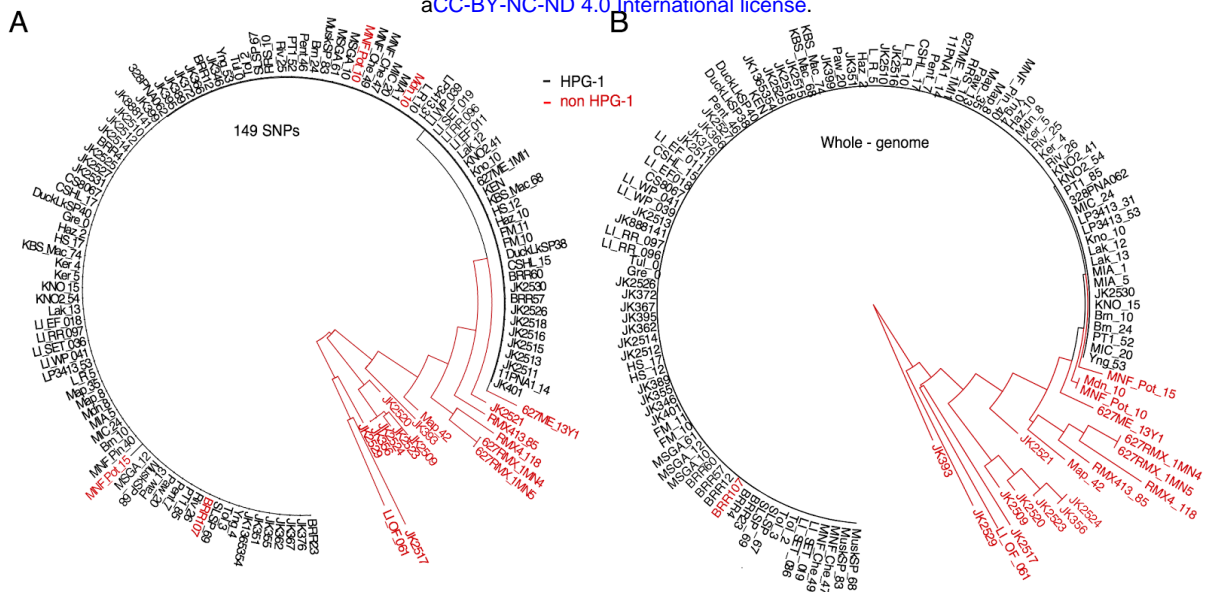

414 **Fig S2. Separation between HPGI and other North American lineages.**

415 **(A)** Neighbor-joining tree built using Illumina-based SNP calls at the 149 genotyping markers  
 416 originally used to identify HPGI candidates. HPGI accessions are shown in black, whereas other  
 417 North American lineages are depicted in red (see explanation below for four HPGI-like accessions).  
 418 **(B)** Neighbor-joining tree based on genome-wide SNPs. Accessions colored as in (A). Note that  
 419 three accessions originally classified as HPGI based on 149 SNPs (A) are placed outside this clade. A  
 420 further accession (BRR7) within the HPGI main branch was a recombinant removed from the  
 421 analysis.

bioRxiv preprint doi: <https://doi.org/10.1101/050203>; this version posted October 5, 2017. The copyright holder for this preprint (which was not certified by peer review) is the author/funder, who has granted bioRxiv a license to display the preprint in perpetuity. It is made available under aCC-BY-NC-ND 4.0 International license.

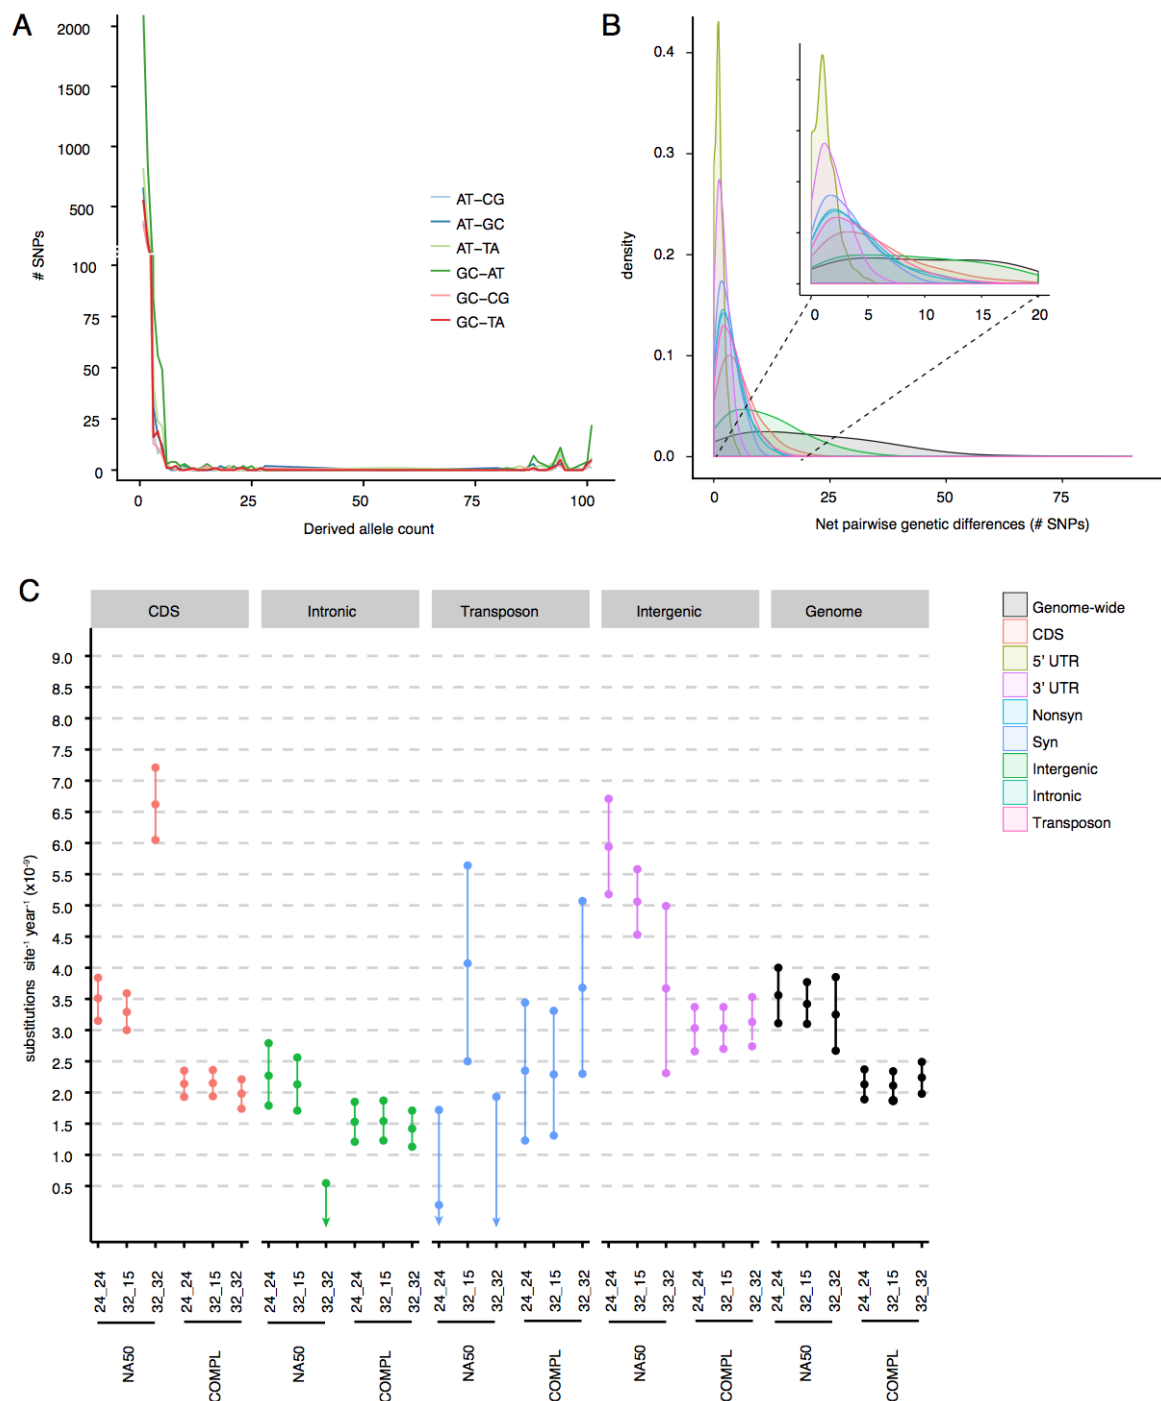

422 **Fig S3. Substitution spectrum and rates.**

423 **(A)** Site frequency spectrum for all transitions and transversions. **(B)** Distributions of “net” pairwise  
 424 genetic distances between historic and modern samples used to calculate mutation rates per  
 425 genomic annotation (from quality 32\_15 and complete information per site). UTRs were excluded  
 426 because of the small number of SNPs. **(C)** Mutation rates calculated for different genomic  
 427 annotations and quality thresholds (32\_32, 32\_15, 24\_24) and missing values (NA50: maximum 50%  
 428 missing data per SNP; COMPL: missing data 0%). Mean and 95% confidence intervals are shown.

bioRxiv preprint doi: <https://doi.org/10.1101/050203>; this version posted October 5, 2017. The copyright holder for this preprint (which was not certified by peer review) is the author/funder, who has granted bioRxiv a license to display the preprint in perpetuity. It is made available under aCC-BY-NC-ND 4.0 International license.

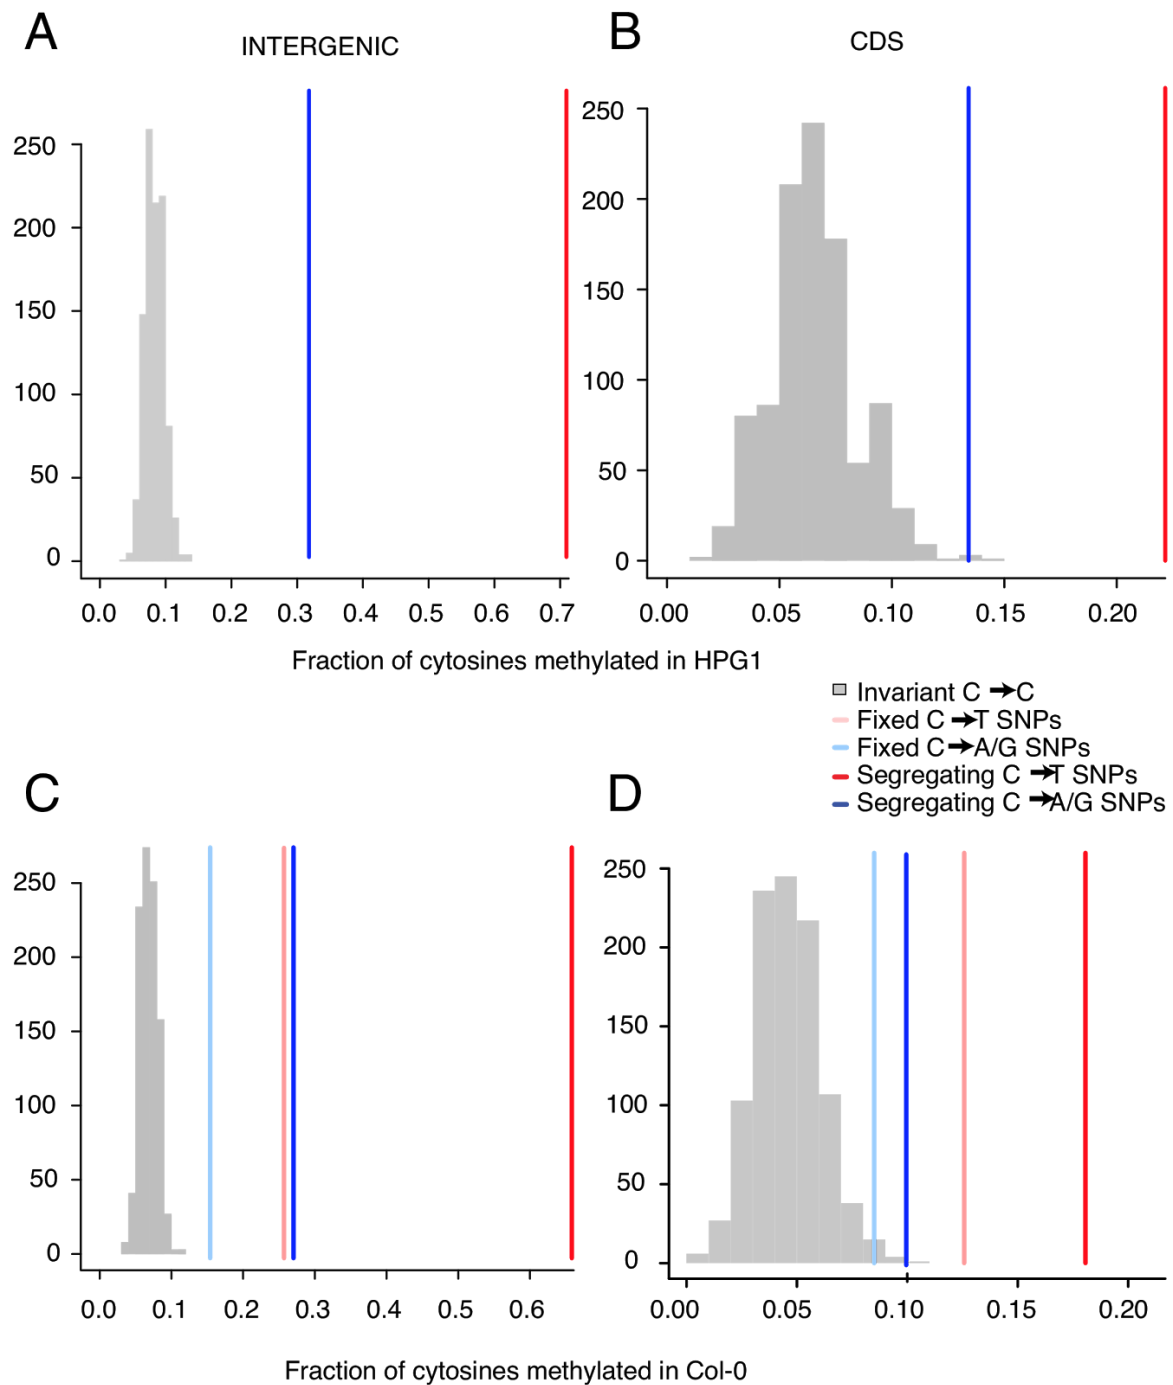

429 **Fig S4. Relationship between methylation and substitutions.**

430 **(A, B)** Fraction of methylation of cytosines in HPG1 pseudo-reference(7) at intergenic (A) or coding  
 431 regions (B). **(C, D)** Fraction of methylation of cytosines in Col-0 reference genome(5) at intergenic  
 432 (C) or coding regions (D). In each of the four comparisons, a grey histogram represents distribution  
 433 of methylation of 1,000 random sets of invariant cytosines. Lines represent average methylation  
 434 degree at those sites in HPG1 that changed from cytosine to thymine (red). We differentiate those

bioRxiv preprint doi: <https://doi.org/10.1101/050203>; this version posted October 5, 2017. The copyright holder for this preprint (which was not certified by peer review) is the author/funder, who has granted bioRxiv a license to display the preprint in perpetuity. It is made available under aCC-BY-NC-ND 4.0 International license.

435 substitutions that are shared - fixed across all individuals (light red) or whose allele are present at  
436 an intermediate - segregating - frequency (dark red). Likewise, average methylation is shown for sites  
437 that changed from cytosine to adenine (blue) that that are fixed (light blue) or segregating (dark  
438 blue). The fact that the average methylation is higher in new substitutions than in invariant positions  
439 supports a connection between methylation and mutability of sites.

bioRxiv preprint doi: <https://doi.org/10.1101/050203>; this version posted October 5, 2017. The copyright holder for this preprint (which was not certified by peer review) is the author/funder, who has granted bioRxiv a license to display the preprint in perpetuity. It is made available under aCC-BY-NC-ND 4.0 International license.

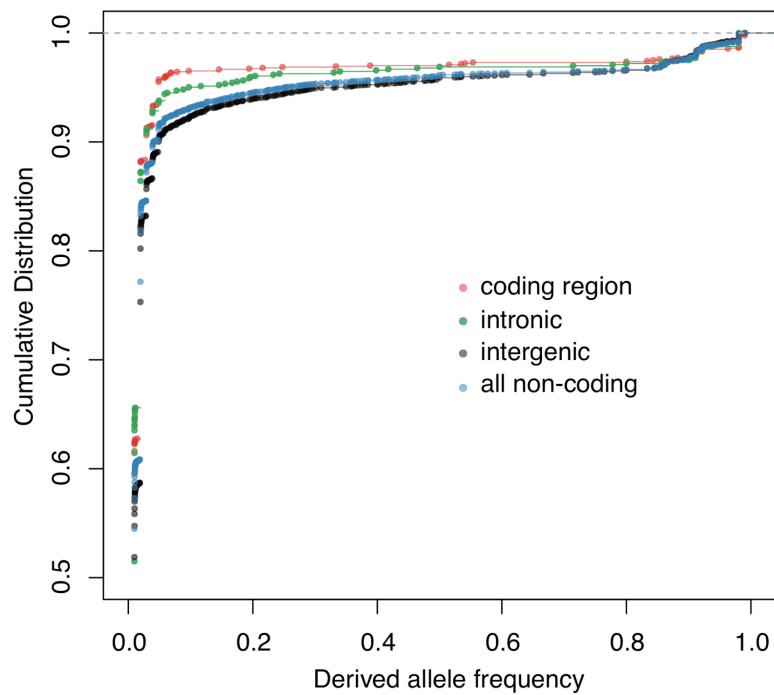

440 **Fig S5. Comparison of Site Frequency Spectra across genomic annotations.**  
441 Cumulative empirical distribution, at different genomic annotations, of the unfolded Site Frequency  
442 Spectrum of SNPs oriented based on the order of appearance of alleles in the herbarium genomes.

bioRxiv preprint doi: <https://doi.org/10.1101/050203>; this version posted October 5, 2017. The copyright holder for this preprint (which was not certified by peer review) is the author/funder, who has granted bioRxiv a license to display the preprint in perpetuity. It is made available under aCC-BY-NC-ND 4.0 International license.

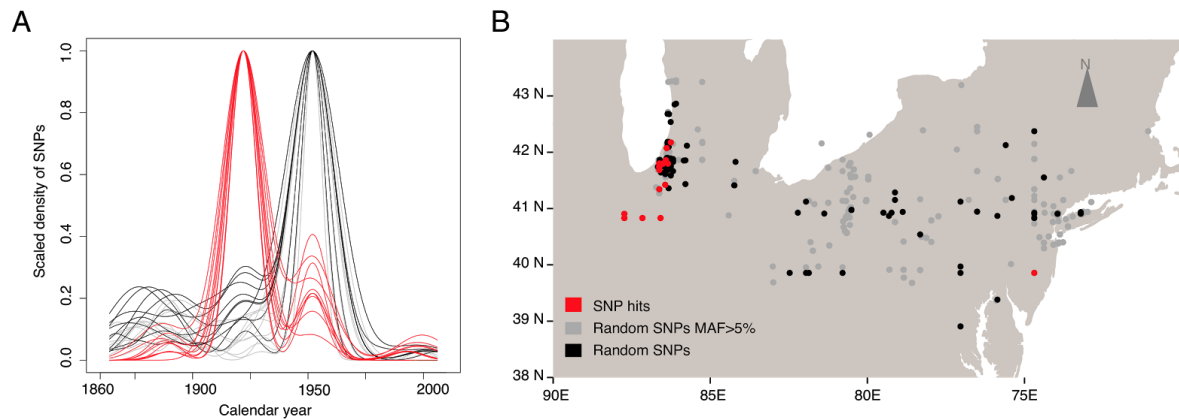

443 **Fig S5. Spatial and temporal emergence of root-associated mutations.**

444 **(A)** Age distribution of derived SNPs with a significant trait association (the herbarium sample in  
 445 which they were first recorded) (red), compared with genome-wide SNPs with at least 5% minor  
 446 allele frequency (grey), or without frequency cutoff (black). **(B)** Spatial centroid of all samples  
 447 carrying a derived allele. Since it is an average location, centroids can be in a body of water. Ten  
 448 random draws of 50 SNPs for each category were used to produce the density lines in (A) and  
 449 points in (B).



bioRxiv preprint doi: <https://doi.org/10.1101/050203>; this version posted October 5, 2017. The copyright holder for this preprint (which was not certified by peer review) is the author/funder, who has granted bioRxiv a license to display the preprint in perpetuity. It is made available under aCC-BY-NC-ND 4.0 International license.

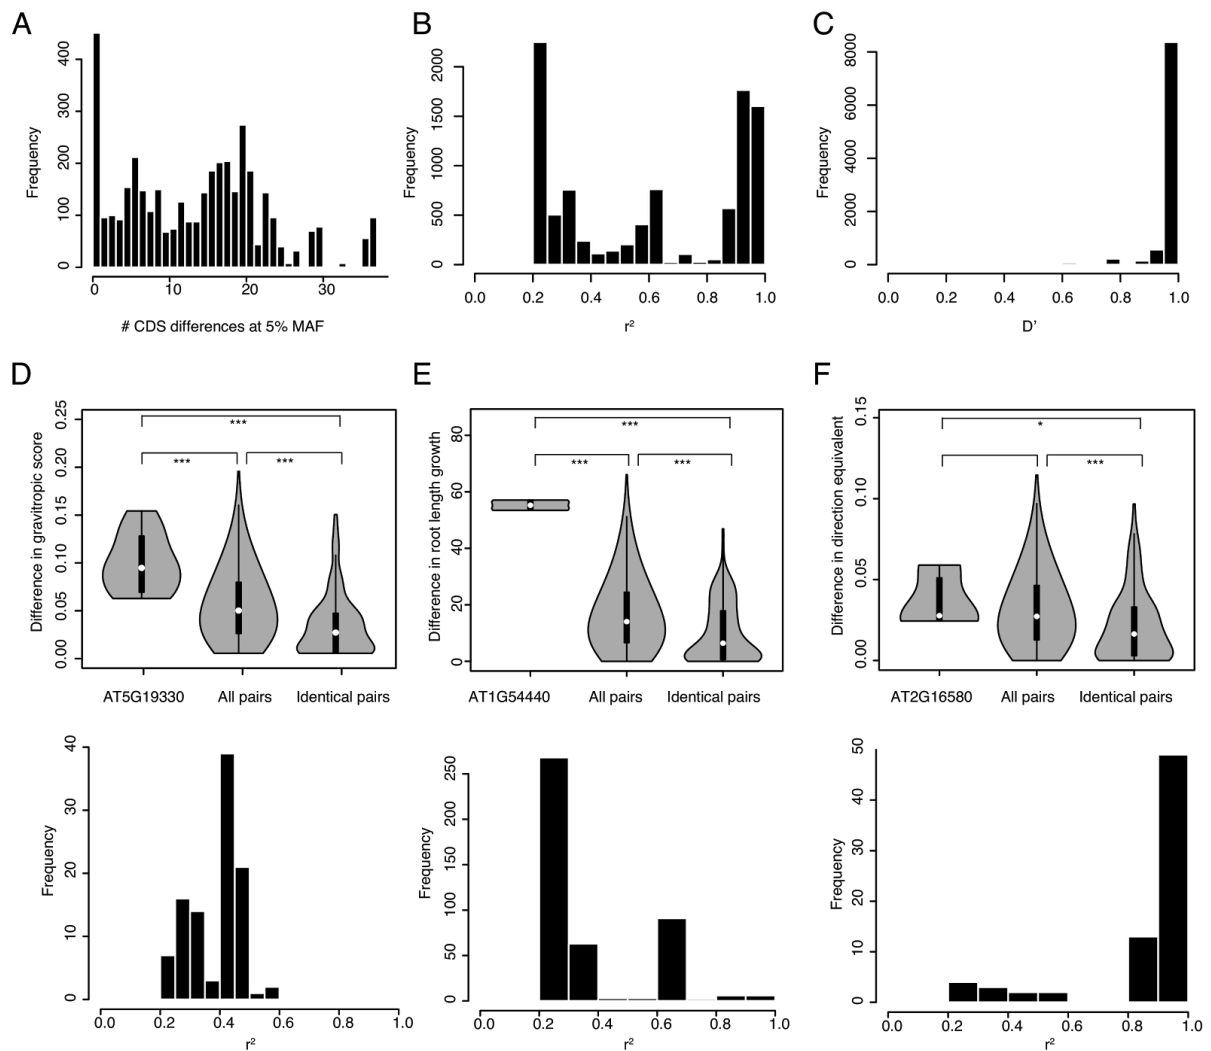

450 **Fig S6. Linkage disequilibrium of significant SNPs.**

451 **(A-F)** Linkage disequilibrium between SNPs with significant trait associations. Histogram of genetic  
 452 distances **(A)** between samples when evaluating only coding regions at 5% minimum allele frequency.  
 453 Linkage disequilibrium between SNP hits measured as  $r^2$  **(B)** and  $D'$  **(C)**. Three significant SNPs were  
 454 further studied to exemplify the power of association analyses with HPGI. For each, phenotypic  
 455 differences between accessions that differ in the focal SNP and that are otherwise virtually genetically  
 456 identical are compared both with all pairs of accessions and with pairs of accessions completely  
 457 identical for coding regions. Below each violin plot is the histogram of linkage disequilibrium of the  
 458 focal SNP with all other SNP hits. The three focal SNPs evaluated are located in AT5G19330 **(D)**,  
 459 AT1G54440 **(E)** and AT2G16580 **(F)**.

**Table S1. Sample information.**

(Abbreviation H\* indicates herbarium samples that cluster with the modern HPG1 clade rather than the historic HPG1 clade in Fig. 3., highlighted as a star in the map from Fig. 1. Abbreviations of herbarium collections or seed sources: UCONN = University of Connecticut Herbarium; CFM = Chicago Field Museum; NY = New York Botanical Garden; ABRC = Arabidopsis Biological Resources Center; OSU = Ohio State University.)

| Accession | Latitude (°N) | Longitude (°E) | State | Date collected | Alternative name | Collector/ Herbarium | Average coverage (x) | Number of covered positions (≥3x) (mapped against HPG1 reference) | Number of covered positions (≥3x) (mapped against Col_0 reference) | SNPs vs HPG1 reference | Belongs to HPG1 | Modern/ Herbarium | Column number in the available genome matrix |
|-----------|---------------|----------------|-------|----------------|------------------|----------------------|----------------------|-------------------------------------------------------------------|--------------------------------------------------------------------|------------------------|-----------------|-------------------|----------------------------------------------|
| JK399     | 38.7155       | -75.635591     | DE    | 1863           | 888124           | NY                   | 9                    | 105,053,631                                                       | 99,889,683                                                         | 142                    | yes             | H                 | 101                                          |
| JK366     | 43.1921       | -77.0102       | NY    | 1866           | 888144           | NY                   | 6.8                  | 100,379,839                                                       | 95,118,236                                                         | 123                    | yes             | H                 | 94                                           |
| JK395     | 38.9068       | -77.036667     | DC    | 1877           | 888134           | NY                   | 10.3                 | 103,620,791                                                       | 98,888,406                                                         | 167                    | yes             | H                 | 100                                          |
| JK888141  | 40.732007     | -74.068455     | NJ    | 1879           | 888141           | NY                   | 42                   | 107,211,409                                                       | 102,634,255                                                        | 161                    | yes             | H                 | 103                                          |
| JK389     | 38.9068       | -77.036667     | DC    | 1888           | 1365363          | NY                   | 9.9                  | 106,042,465                                                       | 100,826,958                                                        | 151                    | yes             | H                 | 98                                           |
| JK362     | 38.9068       | -77.036667     | DC    | 1889           | 1365364          | NY                   | 8.8                  | 103,997,716                                                       | 98,876,320                                                         | 153                    | yes             | H                 | 93                                           |
| JK367     | 40.9249       | -74.0755       | NJ    | 1890           | 1365344          | NY                   | 16.7                 | 107,236,732                                                       | 102,176,782                                                        | 181                    | yes             | H                 | 95                                           |
| JK372     | 41.1222       | -74.3569       | NJ    | 1890           | 1365332          | NY                   | 14.8                 | 106,285,178                                                       | 101,480,369                                                        | 163                    | yes             | H                 | 96                                           |
| JK1365354 | 38.8782       | -77.09048      | VA    | 1891           | 1365354          | NY                   | 36.4                 | 106,718,326                                                       | 102,458,166                                                        | 169                    | yes             | H                 | 88                                           |
| JK376     | 39.97         | -83.01         | NY    | 1891           | 1365337          | NY                   | 12.3                 | 105,962,154                                                       | 100,840,125                                                        | 145                    | yes             | H                 | 97                                           |
| JK351     | 41.15         | -73.766667     | NY    | 1894           | 1365333          | NY                   | 16.1                 | 106,531,302                                                       | 101,841,156                                                        | 153                    | yes             | H                 | 90                                           |
| JK355     | 35.99         | -83.94         | TE    | 1896           | 1365374          | NY                   | 14.3                 | 106,391,637                                                       | 101,455,311                                                        | 192                    | yes             | H                 | 91                                           |
| JK356     | n/a           | n/a            | GA    | 1897           | 1365375          | NY                   | 5.3                  | 90,426,010                                                        | 89,296,191                                                         | n/a                    | no              | H                 | 92                                           |
| JK393     | n/a           | n/a            | NC    | 1897           | 1365370          | NY                   | 30.4                 | 102,894,430                                                       | 101,298,068                                                        | n/a                    | no              | H                 | 99                                           |
| JK346     | 40.643136     | -111.95177     | UT    | 1903           | 102365           | NY                   | 29.1                 | 107,223,283                                                       | 102,450,446                                                        | 222                    | yes             | H                 | 89                                           |
| JK2525    | 41.224343     | -73.06021      | CT    | 1904           | 79391            | UNCONN               | 12.5                 | 105,025,845                                                       | n/a                                                                | 138                    | yes             | H                 | 118                                          |
| JK2529    | n/a           | n/a            | OH    | 1904           | 176849           | CFM                  | 11.4                 | 100,620,441                                                       | n/a                                                                | n/a                    | no              | H                 | 121                                          |

|         |           |            |    |      |               |        |      |             |             |     |     |    |     |
|---------|-----------|------------|----|------|---------------|--------|------|-------------|-------------|-----|-----|----|-----|
| JK401   | 40.643136 | -111.95177 | UT | 1904 | 102364        | NY     | 10.4 | 99,572,736  | 94,661,828  | 216 | yes | H  | 102 |
| JK2513  | 41.102121 | -81.560547 | OH | 1911 | 25            | OSU    | 18.2 | 106,309,854 | n/a         | 176 | yes | H  | 108 |
| JK2509  | n/a       | n/a        | CT | 1917 | 11            | OSU    | 15.1 | 102,169,546 | n/a         | n/a | no  | H  | 104 |
| JK2530  | 41.482862 | -86.822602 | IN | 1922 | 531679        | CFM    | 22.2 | 107,043,540 | n/a         | 161 | yes | H  | 122 |
| JK2526  | 41.666667 | -73.508455 | CT | 1929 | 79409         | UNCONN | 16.3 | 107,026,827 | n/a         | 161 | yes | H  | 119 |
| JK2515  | 41.137296 | -81.863779 | OH | 1930 | 30            | OSU    | 21.3 | 106,893,416 | n/a         | 193 | yes | H  | 110 |
| JK2511  | 41.721618 | -81.243317 | OH | 1934 | 14            | OSU    | 5.6  | 95,822,372  | n/a         | 109 | yes | H  | 106 |
| JK2523  | n/a       | n/a        | OH | 1940 | 25707         | UNC    | 13.1 | 101,421,749 | n/a         | n/a | no  | H  | 116 |
| JK2520  | n/a       | n/a        | OH | 1945 | 54051         | UNC    | 20.3 | 102,831,697 | n/a         | n/a | no  | H  | 114 |
| JK2524  | 39.856783 | -74.686954 | NJ | 1952 | 63978         | UNC    | 13.8 | 100,778,282 | n/a         | n/a | no  | H  | 117 |
| JK2512  | 39.95607  | -81.953309 | OH | 1956 | 21            | OSU    | 16.7 | 106,801,844 | n/a         | 189 | yes | H  | 107 |
| JK2514  | 39.95607  | -81.953309 | OH | 1969 | 27            | OSU    | 28.4 | 107,044,415 | n/a         | 219 | yes | H  | 109 |
| JK2517  | n/a       | n/a        | OH | 1981 | 34            | OSU    | 21.7 | 102,643,436 | n/a         | n/a | no  | H  | 112 |
| JK2521  | n/a       | n/a        | OH | 1992 | 565960        | UNC    | 2.9  | 62,673,938  | n/a         | n/a | no  | H  | 115 |
| JK2518  | 41.867643 | -80.789021 | OH | 1993 | 40            | OSU    | 14.8 | 106,578,197 | n/a         | 177 | yes | H  | 113 |
| JK2531  | 39.856783 | -74.686954 | NJ | 1952 | 1507461       | CFM    | 15.1 | 106,158,181 | n/a         | 177 | yes | H* | 123 |
| JK2510  | 39.688861 | -82.993218 | OH | 1930 | 13            | OSU    | 21   | 106,305,970 | n/a         | 178 | yes | H* | 105 |
| JK2527  | 41.509059 | -72.543694 | CT | 1975 | 79389         | UNCONN | 8.3  | 104,089,205 | n/a         | 200 | yes | H* | 120 |
| JK2516  | 39.500862 | -82.472413 | OH | 1980 | 32            | OSU    | 18.1 | 106,464,569 | n/a         | 198 | yes | H* | 111 |
| CSHL_15 | 40.8585   | -73.4675   | NY | 1993 | CSHL-15       | ABRC   | 39.3 | 108,189,771 | 105,955,885 | 243 | yes | M  | 16  |
| CSHL_17 | 40.8585   | -73.4675   | NY | 1993 | CSHL-17       | ABRC   | 41.5 | 108,194,960 | 105,982,511 | 240 | yes | M  | 17  |
| FM_10   | 42.4489   | -76.5072   | NY | 1993 | FM-10         | ABRC   | 44.6 | 108,203,215 | 106,052,866 | 269 | yes | M  | 20  |
| FM_11   | 42.4489   | -76.5072   | NY | 1993 | FM-11         | ABRC   | 44.4 | 108,214,008 | 106,040,276 | 288 | yes | M  | 21  |
| HS_12   | 42.373    | -71.0627   | MA | 1993 | HS-12         | ABRC   | 48.8 | 108,230,030 | 106,124,249 | 251 | yes | M  | 25  |
| HS_17   | 42.373    | -71.0627   | MA | 1993 | HS-17         | ABRC   | 55.3 | 108,242,062 | 106,155,362 | 254 | yes | M  | 26  |
| Kno_10  | 41.2816   | -86.621    | IN | 1993 | Kno-10        | ABRC   | 39.4 | 108,198,601 | 105,985,288 | 226 | yes | M  | 32  |
| KNO_15  | 41.2816   | -86.621    | IN | 1993 | KNO-15        | ABRC   | 43.6 | 108,219,683 | 106,069,077 | 231 | yes | M  | 33  |
| Gre_0   | 43.178    | -85.2532   | MI | 1995 | Gre-0         | ABRC   | 44.6 | 108,209,345 | 106,032,827 | 207 | yes | M  | 22  |
| Tul_0   | 43.2708   | -85.2563   | MI | 1995 | CS6877        | ABRC   | 31.2 | 108,140,393 | 105,806,418 | 221 | yes | M  | 85  |
| CS8067  | 41.3599   | -122.755   | CA | 1996 | Buckhorn Pas: | ABRC   | 66.4 | 108,260,489 | 106,243,277 | 294 | yes | M  | 15  |
| Tol_2   | 41.6639   | -83.5553   | OH | 1996 | CS8022        | ABRC   | 61   | 108,241,333 | 106,194,209 | 238 | yes | M  | 83  |
| Tol_3   | 41.6639   | -83.5553   | OH | 1996 | CS8023        | ABRC   | 40.2 | 108,184,749 | 105,953,559 | 232 | yes | M  | 84  |
| MIA_1   | 41.7976   | -86.6691   | MI | 1999 | MIA-1         | ABRC   | 73.1 | 108,279,881 | 106,291,612 | 234 | yes | M  | 56  |

|            |         |          |    |      |            |      |      |             |             |     |     |   |    |
|------------|---------|----------|----|------|------------|------|------|-------------|-------------|-----|-----|---|----|
| MIA_5      | 41.7976 | -86.6691 | MI | 1999 | MIA-5      | ABRC | 62.9 | 108,263,557 | 106,250,560 | 235 | yes | M | 57 |
| MIC_20     | 41.8266 | -86.4366 | MI | 1999 | MIC-20     | ABRC | 39.9 | 108,200,416 | 106,010,135 | 237 | yes | M | 58 |
| MIC_24     | 41.8266 | -86.4366 | MI | 1999 | MIC-24     | ABRC | 33.8 | 108,176,527 | 105,728,326 | 237 | yes | M | 59 |
| Brn_10     | 41.9    | -86.583  | MI | 2002 | Brn-10     | ABRC | 33.3 | 108,177,381 | 105,905,097 | 243 | yes | M | 7  |
| Brn_24     | 41.9    | -86.583  | MI | 2002 | Brn-24     | ABRC | 38.4 | 108,208,482 | 105,951,803 | 228 | yes | M | 8  |
| Haz_10     | 41.879  | -86.607  | MI | 2002 | Haz-10     | ABRC | 33.8 | 108,154,100 | 105,903,700 | 230 | yes | M | 23 |
| Haz_2      | 41.879  | -86.607  | MI | 2002 | Haz-2      | ABRC | 39.7 | 108,201,103 | 106,004,251 | 288 | yes | M | 24 |
| Ker_4      | 42.184  | -86.358  | MI | 2002 | Ker-4      | ABRC | 32.1 | 108,132,127 | 105,806,486 | 261 | yes | M | 30 |
| Ker_5      | 42.184  | -86.358  | MI | 2002 | Ker-5      | ABRC | 62.9 | 108,259,905 | 106,246,278 | 259 | yes | M | 31 |
| L_R_10     | 41.847  | -86.67   | MI | 2002 | L-R-10     | ABRC | 22.4 | 108,062,944 | 105,496,224 | 186 | yes | M | 49 |
| L_R_5      | 41.847  | -86.67   | MI | 2002 | L-R-5      | ABRC | 60.6 | 108,255,795 | 106,209,826 | 299 | yes | M | 50 |
| Lak_12     | 41.8    | -86.67   | MI | 2002 | Lak-12     | ABRC | 37.8 | 108,176,901 | 105,775,999 | 237 | yes | M | 36 |
| Lak_13     | 41.8    | -86.67   | MI | 2002 | Lak-13     | ABRC | 28.5 | 107,955,559 | 105,553,559 | 226 | yes | M | 37 |
| Map_35     | 42.166  | -86.412  | MI | 2002 | Map-35     | ABRC | 64.7 | 108,265,863 | 106,224,216 | 290 | yes | M | 51 |
| Map_42     | 42.166  | -86.412  | MI | 2002 | Map-42     | ABRC | 46   | 107,303,032 | 106,093,945 | n/a | no  | M | 52 |
| Map_8      | 42.166  | -86.412  | MI | 2002 | Map-8      | ABRC | 33.4 | 108,155,999 | 105,921,907 | 287 | yes | M | 53 |
| Mdn_10     | 42.051  | -86.509  | MI | 2002 | Mdn-10     | ABRC | 34.9 | 108,106,772 | 105,906,924 | n/a | no  | M | 54 |
| Mdn_8      | 42.051  | -86.509  | MI | 2002 | Mdn-8      | ABRC | 37.4 | 108,199,679 | 105,940,666 | 266 | yes | M | 55 |
| Paw_13     | 42.148  | -86.431  | MI | 2002 | Paw-13     | ABRC | 43   | 108,159,739 | 105,980,721 | 267 | yes | M | 70 |
| Paw_20     | 42.148  | -86.431  | MI | 2002 | Paw-20     | ABRC | 41.3 | 108,218,762 | 106,059,867 | 241 | yes | M | 71 |
| Riv_25     | 42.184  | -86.382  | MI | 2002 | Riv-25     | ABRC | 36.8 | 108,186,632 | 105,779,717 | 273 | yes | M | 76 |
| Riv_26     | 42.184  | -86.382  | MI | 2002 | Riv-26     | ABRC | 35.7 | 108,194,281 | 105,958,738 | 260 | yes | M | 77 |
| Yng_4      | 41.865  | -86.646  | MI | 2002 | Yng-4      | ABRC | 41.3 | 108,182,789 | 106,000,003 | 289 | yes | M | 86 |
| Yng_53     | 41.865  | -86.646  | MI | 2002 | Yng-53     | ABRC | 46   | 108,230,553 | 106,125,861 | 191 | yes | M | 87 |
| RRS_10     | 41.5609 | -86.4251 | IN | 2003 | RRS-10     | ABRC | 41.8 | 108,208,144 | 106,033,465 | 274 | yes | M | 80 |
| DuckLkSP38 | 43.3431 | -86.4045 | MI | 2004 | DuckLkSP38 | ABRC | 37.1 | 108,171,751 | 105,932,415 | 253 | yes | M | 18 |
| DuckLkSP40 | 43.3431 | -86.4045 | MI | 2004 | DuckLkSP40 | ABRC | 39.6 | 108,204,654 | 105,969,244 | 257 | yes | M | 19 |
| KBS_Mac_68 | 42.405  | -85.398  | MI | 2004 | KBS-Mac-68 | ABRC | 41.3 | 108,181,390 | 105,870,424 | 259 | yes | M | 27 |
| KBS_Mac_74 | 42.405  | -85.398  | MI | 2004 | KBS-Mac-74 | ABRC | 37.7 | 108,160,645 | 105,801,702 | 265 | yes | M | 28 |
| MNF_Che_47 | 43.5251 | -86.1843 | MI | 2004 | MNF-Che-47 | ABRC | 27.6 | 108,093,393 | 105,596,885 | 281 | yes | M | 60 |
| MNF_Che_49 | 43.5251 | -86.1843 | MI | 2004 | MNF-Che-49 | ABRC | 28.5 | 108,082,202 | 105,661,610 | 274 | yes | M | 61 |
| MNF_Pin_40 | 43.5356 | -86.1788 | MI | 2004 | MNF-Pin-40 | ABRC | 47.9 | 108,238,775 | 106,099,919 | 287 | yes | M | 62 |
| MNF_Pot_10 | 43.595  | -86.2657 | MI | 2004 | MNF-Pot-10 | ABRC | 61.4 | 108,189,553 | 106,228,588 | n/a | no  | M | 63 |

|             |         |          |    |      |            |      |       |             |             |     |     |   |    |
|-------------|---------|----------|----|------|------------|------|-------|-------------|-------------|-----|-----|---|----|
| MNF_Pot_15  | 43.595  | -86.2657 | MI | 2004 | MNF-Pot-15 | ABRC | 25.2  | 108,543,185 | 107,022,924 | n/a | no  | M | 64 |
| MSGA_10     | 43.2749 | -86.0891 | MI | 2004 | MSGA-10    | ABRC | 41.9  | 108,191,659 | 106,019,404 | 233 | yes | M | 65 |
| MSGA_12     | 43.2749 | -86.0891 | MI | 2004 | MSGA-12    | ABRC | 42.8  | 108,227,214 | 106,032,928 | 240 | yes | M | 66 |
| MSGA_61     | 43.2749 | -86.0891 | MI | 2004 | MSGA-61    | ABRC | 45.5  | 108,210,152 | 106,077,183 | 247 | yes | M | 67 |
| MuskSP_68   | 43.2483 | -86.3368 | MI | 2004 | MuskSP-68  | ABRC | 25.8  | 108,063,297 | 105,588,467 | 215 | yes | M | 68 |
| MuskSP_83   | 43.2483 | -86.3368 | MI | 2004 | MuskSP-83  | ABRC | 29.9  | 108,099,368 | 105,721,042 | 222 | yes | M | 69 |
| Pent_46     | 43.7623 | -86.3929 | MI | 2004 | Pent-46    | ABRC | 48.3  | 108,227,763 | 106,099,890 | 238 | yes | M | 72 |
| Pent_7      | 43.7623 | -86.3929 | MI | 2004 | Pent-7     | ABRC | 55.7  | 108,220,625 | 106,144,167 | 240 | yes | M | 73 |
| SLSP_67     | 43.665  | -86.496  | MI | 2004 | SLSP-67    | ABRC | 53.5  | 108,238,880 | 106,143,530 | 245 | yes | M | 81 |
| SLSP_69     | 43.665  | -86.496  | MI | 2004 | SLSP-69    | ABRC | 35.5  | 108,160,835 | 105,899,252 | 249 | yes | M | 82 |
| KNO2_41     | 41.273  | -86.625  | IN | 2005 | KNO2.41    | ABRC | 44.7  | 108,209,694 | 106,063,235 | 219 | yes | M | 34 |
| KNO2_54     | 41.273  | -86.625  | IN | 2005 | KNO2.54    | ABRC | 44    | 108,212,430 | 105,903,373 | 218 | yes | M | 35 |
| LI_EF_011   | 40.9064 | -73.1493 | NY | 2005 | LI-EF-011  | ABRC | 68.6  | 108,267,109 | 106,250,331 | 259 | yes | M | 38 |
| LI_EF_018   | 40.9064 | -73.1493 | NY | 2005 | LI-EF-018  | ABRC | 39    | 108,244,306 | 105,898,497 | 230 | yes | M | 39 |
| LI_OF_061   | 40.7777 | -72.9069 | NY | 2005 | LI-OF-061  | ABRC | 58    | 104,897,841 | 105,729,196 | n/a | no  | M | 40 |
| LI_RR_096   | 40.9447 | -72.8615 | NY | 2005 | LI-RR-096  | ABRC | 63.5  | 108,264,679 | 106,251,487 | 261 | yes | M | 41 |
| LI_RR_097   | 40.9447 | -72.8615 | NY | 2005 | LI-RR-097  | ABRC | 40.8  | 108,211,310 | 105,992,095 | 249 | yes | M | 42 |
| LI_SET_019  | 40.9352 | -73.114  | NY | 2005 | LI-SET-019 | ABRC | 29.9  | 108,085,297 | 105,737,781 | 259 | yes | M | 43 |
| LI_SET_036  | 40.9352 | -73.114  | NY | 2005 | LI-SET-036 | ABRC | 41.5  | 108,216,592 | 106,006,605 | 238 | yes | M | 44 |
| LI_WP_039   | 40.9076 | -73.2089 | NY | 2005 | LI-WP-039  | ABRC | 104.8 | 108,301,282 | 106,273,259 | 239 | yes | M | 45 |
| LI_WP_041   | 40.9076 | -73.2089 | NY | 2005 | LI-WP-041  | ABRC | 76.5  | 108,287,248 | 106,322,146 | 235 | yes | M | 46 |
| PT1_52      | 41.3423 | -86.7368 | IN | 2005 | PT1.52     | ABRC | 50.6  | 108,240,431 | 106,154,252 | 219 | yes | M | 74 |
| PT1_85      | 41.3423 | -86.7368 | IN | 2005 | PT1.85     | ABRC | 46.1  | 108,220,150 | 106,097,633 | 233 | yes | M | 75 |
| RMX4_118    | 42.036  | -86.511  | MI | 2005 | RMX4.118   | ABRC | 41.8  | 106,178,554 | 105,685,651 | n/a | no  | M | 78 |
| 11PNA1_14   | 42.0945 | -86.3253 | MI | 2006 | 11PNA1.14  | ABRC | 47.5  | 108,227,783 | 106,133,372 | 276 | yes | M | 1  |
| 328PNA062   | 42.0945 | -86.3253 | MI | 2006 | 328PNA062  | ABRC | 47.3  | 108,221,709 | 106,127,272 | 223 | yes | M | 2  |
| 627ME_13Y1  | 42.093  | -86.359  | MI | 2006 | n/a        | ABRC | 53.4  | 107,908,679 | 106,148,671 | n/a | no  | M | 3  |
| 627ME_1MI1  | 42.093  | -86.359  | MI | 2006 | 627ME-1MI1 | ABRC | 57.8  | 108,252,617 | 106,173,403 | 281 | yes | M | 4  |
| 627RMX_1MN4 | 42.0333 | -86.5128 | MI | 2006 | n/a        | ABRC | 43.6  | 106,799,549 | 105,789,469 | n/a | no  | M | 5  |
| 627RMX_1MN5 | 42.0333 | -86.5128 | MI | 2006 | n/a        | ABRC | 50.6  | 106,885,430 | 105,897,441 | n/a | no  | M | 6  |
| BRR107      | 40.8313 | -87.735  | IL | 2006 | BRR107     | ABRC | 28.5  | 108,896,513 | 107,320,745 | n/a | no  | M | 9  |
| BRR12       | 40.8313 | -87.735  | IL | 2006 | BRR12      | ABRC | 43.9  | 108,190,572 | 106,031,493 | 232 | yes | M | 10 |
| BRR23       | 40.8313 | -87.735  | IL | 2006 | BRR23      | ABRC | 30.7  | 108,095,072 | 105,726,913 | 236 | yes | M | 11 |

|           |         |          |    |      |           |      |      |             |             |     |     |   |    |
|-----------|---------|----------|----|------|-----------|------|------|-------------|-------------|-----|-----|---|----|
| BRR4      | 40.8313 | -87.735  | IL | 2006 | BRR4      | ABRC | 44.7 | 108,180,840 | 106,033,507 | 219 | yes | M | 12 |
| BRR57     | 40.8313 | -87.735  | IL | 2006 | BRR57     | ABRC | 28.4 | 108,093,033 | 105,630,963 | 225 | yes | M | 13 |
| BRR60     | 40.8313 | -87.735  | IL | 2006 | BRR60     | ABRC | 42.9 | 108,281,285 | 106,199,572 | 229 | yes | M | 14 |
| KEN       | 41.767  | -72.677  | CT | n/a  | KEN       | ABRC | 55.2 | 108,233,232 | 106,158,223 | 249 | yes | M | 29 |
| LP3413_31 | 41.6862 | -86.8513 | IN | n/a  | LP3413.31 | ABRC | 55.9 | 108,244,332 | 106,190,596 | 227 | yes | M | 47 |
| LP3413_53 | 41.6862 | -86.8513 | IN | n/a  | LP3413.53 | ABRC | 51.2 | 108,157,453 | 105,994,665 | 245 | yes | M | 48 |
| RMX413_85 | 42.036  | -86.511  | MI | n/a  | RMX413.85 | ABRC | 38   | 106,816,221 | 105,483,632 | n/a | no  | M | 79 |

**Table S2. Sample information for Col-0 mutation accumulation lines.**

Information about each Mutation Accumulation (MA) line and their number of SNPs at different annotations. Also the total number of SNPs, average number of mutations and total bp covered in the genome per annotation are reported.

| MA line        | Read depth | Generation | Total       | SNPs | Deletions | insertions | CDS | Nonsyn | Syn | Intron     | 5' UTR    | 3' UTR    | TE        | Intergenic |
|----------------|------------|------------|-------------|------|-----------|------------|-----|--------|-----|------------|-----------|-----------|-----------|------------|
| 0-4-26         | 57         | 3          | 7           | 6    | 1         | 0          | 0   | 0      | 0   | 0          | 0         | 0         | 1         | 5          |
| 0-8-87         | 49         | 3          | 7           | 5    | 0         | 2          | 1   | 1      | 0   | 1          | 0         | 0         | 0         | 3          |
| 30-109         | 45         | 31         | 31          | 23   | 7         | 1          | 3   | 3      | 0   | 3          | 0         | 0         | 2         | 15         |
| 30-119         | 45         | 31         | 33          | 26   | 2         | 5          | 1   | 1      | 0   | 1          | 2         | 0         | 4         | 18         |
| 30-29          | 51         | 31         | 39          | 26   | 10        | 3          | 2   | 1      | 1   | 3          | 0         | 1         | 5         | 15         |
| 30-39          | 48         | 31         | 28          | 18   | 7         | 3          | 1   | 1      | 0   | 1          | 0         | 1         | 4         | 11         |
| 30-49          | 50         | 31         | 30          | 23   | 3         | 4          | 4   | 4      | 0   | 0          | 0         | 0         | 6         | 13         |
| 30-59          | 40         | 31         | 46          | 31   | 8         | 7          | 5   | 2      | 3   | 2          | 0         | 0         | 6         | 18         |
| 30-69          | 50         | 31         | 26          | 21   | 3         | 2          | 4   | 3      | 1   | 1          | 1         | 1         | 6         | 8          |
| 30-79          | 50         | 31         | 31          | 25   | 3         | 3          | 6   | 4      | 2   | 2          | 0         | 0         | 8         | 9          |
| 30-89          | 39         | 31         | 35          | 27   | 5         | 3          | 4   | 3      | 1   | 1          | 1         | 0         | 2         | 19         |
| 30-99          | 44         | 31         | 37          | 35   | 1         | 1          | 6   | 5      | 1   | 2          | 0         | 2         | 8         | 17         |
| Total SNPs     |            |            |             | 274  |           |            | 38  | 28     | 10  | 17         | 4         | 5         | 52        | 158        |
| average (31st) |            |            | 33.6        | 25.5 | 4.9       | 3.2        | 3.6 | 2.7    | 0.9 | 1.6        | 0.4       | 0.5       | 5.1       | 14.3       |
| stdev (31st)   |            |            | 5.9         | 4.9  | 3.0       | 1.8        | 1.8 | 1.4    | 1.0 | 1.0        | 0.7       | 0.7       | 2.1       | 3.9        |
| Total bp       |            |            | 115,954,227 |      |           | 30,753,966 |     |        |     | 17,446,837 | 4,289,789 | 2,508,199 | 9,267,413 | 48,090,487 |

**Table S3. Mutation rate estimates for different annotations in HPG1 and mutation accumulation lines.**

Mutation rates from MA lines are compared to HPG1 substitution rates from the dataset of 32\_15 quality filter and complete information (see SOM)  
 (Abbreviations: stat, descriptive statistic; bp, base pairs; lower and upper, lower and upper 95% CI; Nonsyn. and Syn., nonsynonymous and synonymous sites; UTR, untranslated region sites; HPG1 adj., substitution rate of HPG1 adjusted by a mean generation time of 1.3 years)

| Dataset                                  | stat    | CDS      | Syn. | Nonsyn. | Intronic | 5' UTR  | 3' UTR  | Transposon | Intergenic | Genome    |
|------------------------------------------|---------|----------|------|---------|----------|---------|---------|------------|------------|-----------|
| MA                                       | mean    | 3.776    | n/a  | n/a     | 2.958    | 3.008   | 6.431   | 17.752     | 9.592      | 7.094     |
| MA                                       | sem     | 1.928    | n/a  | n/a     | 1.786    | 5.258   | 9.094   | 7.420      | 2.628      | 1.352     |
| MA                                       | lower   | 2.581    | n/a  | n/a     | 1.851    | -0.251  | 0.794   | 13.153     | 7.964      | 6.256     |
| MA                                       | upper   | 4.971    | n/a  | n/a     | 4.065    | 6.267   | 12.067  | 22.351     | 11.221     | 7.932     |
| HPG1                                     | mean    | 2.149    | n/a  | n/a     | 1.540    | n/a     | n/a     | 2.290      | 3.029      | 2.114     |
| HPG1                                     | sem     | 0.108    | n/a  | n/a     | 0.165    | n/a     | n/a     | 0.536      | 0.173      | 0.119     |
| HPG1                                     | lower   | 1.943    | n/a  | n/a     | 1.231    | n/a     | n/a     | 1.314      | 2.698      | 1.871     |
| HPG1                                     | upper   | 2.364    | n/a  | n/a     | 1.874    | n/a     | n/a     | 3.309      | 3.368      | 2.344     |
| HPG1 adj.                                | mean    | 2.794    | n/a  | n/a     | 2.002    | n/a     | n/a     | 2.977      | 3.938      | 2.748     |
| HPG1 adj.                                | sem     | 0.140    | n/a  | n/a     | 0.214    | n/a     | n/a     | 0.697      | 0.225      | 0.154     |
| HPG1 adj.                                | lower   | 2.526    | n/a  | n/a     | 1.600    | n/a     | n/a     | 1.708      | 3.508      | 2.432     |
| HPG1 adj.                                | upper   | 3.073    | n/a  | n/a     | 2.436    | n/a     | n/a     | 4.302      | 4.378      | 3.047     |
| Distribution of pairwise SNP differences | min     | 0        | 0    | 0       | 0        | 0       | 0       | 0          | 0          | 0         |
|                                          | 1st qu. | 2        | 1    | 1       | 1        | 0       | 1       | 2          | 5          | 9         |
|                                          | median  | 5        | 3    | 3       | 3        | 1       | 2       | 4          | 10         | 18        |
|                                          | mean    | 5.6      | 3    | 3.1     | 3.8      | 1.2     | 1.9     | 4.3        | 11.3       | 21.1      |
|                                          | 3rd qu. | 8        | 5    | 4       | 5        | 2       | 3       | 6          | 16         | 31        |
|                                          | max.    | 27       | 17   | 11      | 15       | 5       | 7       | 22         | 43         | 87        |
| Total number of SNPs                     |         | 971      | 531  | 448     | 629      | 74      | 158     | 656        | 2498       | 5013      |
| Total bp                                 |         | 32119233 | n/a  | n/a     | 18132262 | 2632130 | 4480510 | 6209512    | 43601507   | 108434034 |



**Table S4. Description of phenotypic and climatic variables for association mapping analyses.**

Mean and standard deviation (s.d.) across accessions for each phenotypic and climatic variables. Broad sense heritabilities (H2) were calculated from between line and within line (between replicate) variance in ANOVA. P-value corresponds to F test. Narrow sense heritabilities (h2) were calculated employing linear mixed models and kinship matrix from mean accession values. P-values correspond to Likelihood Ratio test.

| Variable      | Description                                                                               | mean  | s.d.   | H2    | p-value  | h2    | p-value  |
|---------------|-------------------------------------------------------------------------------------------|-------|--------|-------|----------|-------|----------|
| FT_V0         | Time from germination until the first flower opens (days) under 0 days of vernalization   | 101   | 4.53   | 0.009 | 7.28E-03 | 0.017 | 1.97E-25 |
| FT_V1         | Time from germination until the first flower opens (days) under 14 days of vernalization  | 107   | 4.12   | 0.013 | 6.87E-04 | 0.395 | 1.83E-25 |
| FT_V2         | Time from germination until the first flower opens (days) under 28 days of vernalization  | 102   | 3.22   | 0.012 | 1.04E-03 | 0.429 | 3.37E-27 |
| FT_V3         | Time from germination until the first flower opens (days) under 63 days of vernalization  | 110   | 1.32   | 0.010 | 5.11E-03 | 0.226 | 9.52E-25 |
| B_V0          | Time from germination until the first developed bud (days) under 0 days of vernalization  | 88.8  | 4      | 0.013 | 8.99E-04 | 0.018 | 2.26E-25 |
| B_V1          | Time from germination until the first developed bud (days) under 14 days of vernalization | 93.9  | 3.84   | 0.009 | 7.45E-03 | 0.340 | 3.98E-25 |
| B_V2          | Time from germination until the first developed bud (days) under 28 days of vernalization | 89.2  | 2.13   | 0.005 | 6.92E-02 | 0.252 | 2.22E-25 |
| B_V3          | Time from germination until the first developed bud (days) under 63 days of vernalization | 101   | 0.45   | 0.006 | 5.79E-02 | 0.177 | 1.99E-24 |
| Fecundity     | Pixel area of inflorescence (correlation with number of fruits, rho=0.84)                 | 0.02  | 0.0042 | 0.001 | 3.56E-01 | 0.240 | 1.02E-22 |
| seed_size     | Average seed size (mm <sup>2</sup> )                                                      | 0.134 | 0.0053 | 0.016 | 4.73E-03 | 0.149 | 3.58E-24 |
| GR_rootLength | Average root growth rate                                                                  | 181   | 14.9   | 0.131 | 4.76E-77 | 0.640 | 3.13E-29 |
| GR_shootArea  | Average of shoot area growth rate                                                         | 2279  | 253    | 0.053 | 2.33E-24 | 0.812 | 1.77E-31 |
| rootLength    | Average root length                                                                       | 467   | 35.8   | 0.048 | 2.01E-21 | 0.409 | 2.57E-28 |

|                  |                                                                                                                                    |       |        |       |          |       |          |
|------------------|------------------------------------------------------------------------------------------------------------------------------------|-------|--------|-------|----------|-------|----------|
| dirEquivalent    | Average root direction index. Score for average pixel-by-pixel deviations from growth relative to vector of gravity                | 0.393 | 0.0277 | 0.059 | 2.62E-28 | 0.544 | 1.14E-26 |
| stdDevXY         | Average root linearity coefficient of linear determination; R2 of linear regression line fitted to pixels of primary root skeleton | 0.725 | 0.0429 | 0.018 | 4.54E-06 | 0.303 | 1.41E-25 |
| meanRootWidth    | Average root width                                                                                                                 | 5.27  | 0.177  | 0.038 | 5.30E-16 | 0.359 | 1.52E-25 |
| rootWidth20      | Average width over first interval of the primary root length (0 to 20%) at hypocotyl/root junction                                 | 5.75  | 0.124  | 0.018 | 5.11E-06 | 0.166 | 3.37E-25 |
| rootWidth40      | Average width over first interval of the primary root length (20 to 40%) at hypocotyl/root junction                                | 5.35  | 0.19   | 0.033 | 3.87E-13 | 0.291 | 1.76E-25 |
| rootWidth60      | Average width over first interval of the primary root length (40 to 60%) at hypocotyl/root junction                                | 5.2   | 0.212  | 0.039 | 1.49E-16 | 0.405 | 6.51E-26 |
| rootWidth80      | Average width over first interval of the primary root length (60 to 80%) at hypocotyl/root junction                                | 5.11  | 0.241  | 0.045 | 4.67E-20 | 0.381 | 5.47E-26 |
| rootWidth100     | Average width over first interval of the primary root length (80 to 100%) at hypocotyl/root junction                               | 4.9   | 0.222  | 0.038 | 4.06E-16 | 0.351 | 8.81E-26 |
| gravitropicDir   | Average root angle between root vector and the vertical axis of the picture (assumed vector of gravity) (°)                        | -7.22 | 2.56   | 0.024 | 7.69E-09 | 0.210 | 4.68E-27 |
| gravitropicScore | Average score for root angle intervals                                                                                             | 0.1   | 0.0457 | 0.044 | 2.83E-19 | 0.642 | 7.56E-27 |
| TotLen.EucLen    | Average root tortuosity: Total root length divided by Euclidian length                                                             | 1.1   | 0.0097 | 0.009 | 6.83E-03 | 0.422 | 2.53E-25 |
| GR.TL            | Average relative root growth rate: Root growth rate divided by total length at the earlier time point                              | 0.673 | 0.0796 | 0.011 | 1.20E-03 | 0.393 | 2.69E-24 |
| BIO1             | Annual Mean Temperature (°C x 10)                                                                                                  | 98.1  | 12.8   | n/a   | n/a      | 0.066 | 3.22E-40 |
| BIO2             | Mean Diurnal Range (Mean of monthly (max temp - min temp))                                                                         | 107   | 7.65   | n/a   | n/a      | 0.073 | 1.02E-40 |
| BIO3             | Isothermality (BIO2/BIO7) (x 100)                                                                                                  | 28.9  | 1.8    | n/a   | n/a      | 0.361 | 4.91E-39 |
| BIO4             | Temperature Seasonality (standard deviation x 100)                                                                                 | 9169  | 483    | n/a   | n/a      | 0.383 | 4.68E-47 |
| BIO5             | Max Temperature of Warmest Month (°C x 10)                                                                                         | 283   | 10.1   | n/a   | n/a      | 0.152 | 3.78E-40 |
| BIO6             | Min Temperature of Coldest Month (°C x 10)                                                                                         | -80.9 | 18     | n/a   | n/a      | 0.275 | 4.79E-42 |
| BIO7             | Temperature Annual Range (BIO5-BIO6) (°C x 10)                                                                                     | 364   | 17.5   | n/a   | n/a      | 0.239 | 6.31E-42 |
| BIO8             | Mean Temperature of Wettest Quarter (°C x 10)                                                                                      | 176   | 55.1   | n/a   | n/a      | 0.016 | 3.58E-43 |

|       |                                                      |       |      |     |     |       |          |
|-------|------------------------------------------------------|-------|------|-----|-----|-------|----------|
| BIO9  | Mean Temperature of Driest Quarter (°C x 10)         | -7.11 | 48.7 | n/a | n/a | 0.000 | 3.58E-43 |
| BIO10 | Mean Temperature of Warmest Quarter (°C x 10)        | 213   | 10.8 | n/a | n/a | 0.205 | 3.33E-40 |
| BIO11 | Mean Temperature of Coldest Quarter (°C x 10)        | -24.1 | 18.2 | n/a | n/a | 0.270 | 1.71E-41 |
| BIO12 | Annual Precipitation (mm)                            | 990   | 109  | n/a | n/a | 0.219 | 3.94E-44 |
| BIO13 | Precipitation of Wettest Month (mm)                  | 103   | 6.72 | n/a | n/a | 0.206 | 1.53E-40 |
| BIO14 | Precipitation of Driest Month (mm)                   | 54.1  | 16.7 | n/a | n/a | 0.104 | 1.51E-40 |
| BIO15 | Precipitation Seasonality (Coefficient of Variation) | 17.8  | 5.51 | n/a | n/a | 0.157 | 8.93E-40 |
| BIO16 | Precipitation of Wettest Quarter (mm)                | 291   | 19.7 | n/a | n/a | 0.269 | 1.55E-42 |
| BIO17 | Precipitation of Driest Quarter (mm)                 | 191   | 44.8 | n/a | n/a | 0.084 | 3.67E-42 |
| BIO18 | Precipitation of Warmest Quarter (mm)                | 277   | 25.2 | n/a | n/a | 0.342 | 7.42E-44 |
| BIO19 | Precipitation of Coldest Quarter (mm)                | 197   | 47   | n/a | n/a | 0.022 | 2.68E-42 |

---

**Table S5. SNP hits from association analyses and several descriptors.**

SNP hits significant at the 5% level after permutation correction are shown. Additionally, if raw p-values pass a double Bonferroni threshold of 0.01% are marked with a "tick". (Abbreviations: nonsyn. and syn., nonsynonymous and synonymous changes; regular one-letter abbreviation was used for amino acid changes)

| Trait            | Chromosome | Position | Ancestral | Derived | Effect   | Effect standard error | Sample size | p - value raw | p- value false discovery rate | p- value permutation corrected | Allele frequency | Allele frequency in modern set | Oldest herbarium individual | Longitude | Latitude | Substitution type | AA change | Gene | Biochemical effect (Grantham score) | Significant permutation | Significant double Bonferroni | LD |    |
|------------------|------------|----------|-----------|---------|----------|-----------------------|-------------|---------------|-------------------------------|--------------------------------|------------------|--------------------------------|-----------------------------|-----------|----------|-------------------|-----------|------|-------------------------------------|-------------------------|-------------------------------|----|----|
| dirEquivalent    | 1          | 958948   | G         | T       | -0.014   | 0.004                 | 63          | 5.30E-04      | 0.0052                        | 0.018                          | 0.186            | 0.227                          | 1922                        | 41.7      | -85.3    | nonsyn A->P       | AT1G03810 | 27   | ✓                                   |                         |                               | 53 |    |
| gravitropicScore | 1          | 9925177  | C         | T       | 0.033    | 0.010                 | 63          | 7.10E-04      | 0.0651                        | 0.016                          | 0.078            | 0.092                          | 1952                        | 40.9      | -82.3    | interg.           |           |      |                                     | ✓                       |                               | 1  |    |
| bio18            | 1          | 10187610 | T         | C       | 6.830    | 1.987                 | 99          | 5.83E-04      | 0.0124                        | 0.047                          | 0.196            | 0.24                           | 1922                        | 41.7      | -85.3    | interg.           |           |      |                                     | ✓                       |                               |    | 52 |
| GR_rootLength    | 1          | 12638692 | C         | T       | -12.100  | 3.164                 | 63          | 1.33E-04      | 0.0037                        | 0.003                          | 0.087            | 0.105                          | 1952                        | 40.9      | -81.3    | interg.           |           |      |                                     | ✓                       | ✓                             |    | 13 |
| GR_shootArea     | 1          | 12638692 | C         | T       | -231.000 | 53.774                | 63          | 1.75E-05      | 0.0005                        | 0.001                          | 0.087            | 0.105                          | 1952                        | 40.9      | -81.3    | interg.           |           |      |                                     | ✓                       | ✓                             |    | 13 |
| GR_rootLength    | 1          | 13652509 | C         | A       | -12.100  | 3.164                 | 63          | 1.33E-04      | 0.0037                        | 0.003                          | 0.093            | 0.107                          | 1952                        | 40.9      | -82.9    | interg.           |           |      |                                     | ✓                       | ✓                             |    | 12 |
| GR_shootArea     | 1          | 13652509 | C         | A       | -231.000 | 53.774                | 63          | 1.75E-05      | 0.0005                        | 0.001                          | 0.093            | 0.107                          | 1952                        | 40.9      | -82.9    | interg.           |           |      |                                     | ✓                       | ✓                             |    | 12 |
| bio18            | 1          | 13904611 | C         | T       | 6.570    | 1.756                 | 90          | 1.83E-04      | 0.0124                        | 0.016                          | 0.217            | 0.237                          | 1922                        | 41.7      | -85.3    | interg.           |           |      |                                     | ✓                       |                               |    | 49 |
| bio18            | 1          | 13994958 | G         | A       | 6.830    | 1.987                 | 99          | 5.83E-04      | 0.0124                        | 0.047                          | 0.196            | 0.24                           | 1922                        | 41.7      | -85.3    | tranposon         | AT1G36933 |      |                                     | ✓                       |                               |    | 49 |
| bio18            | 1          | 17408807 | C         | T       | 6.830    | 1.987                 | 99          | 5.83E-04      | 0.0124                        | 0.047                          | 0.196            | 0.24                           | 1922                        | 41.7      | -85.3    | interg.           |           |      |                                     | ✓                       |                               |    | 48 |
| dirEquivalent    | 1          | 19024876 | C         | T       | -0.014   | 0.004                 | 63          | 5.30E-04      | 0.0052                        | 0.018                          | 0.19             | 0.23                           | 1922                        | 41.7      | -85.3    | interg.           |           |      |                                     | ✓                       |                               |    | 47 |
| GR_shootArea     | 1          | 20324050 | G         | A       | -231.000 | 53.774                | 63          | 1.75E-05      | 0.0005                        | 0.001                          | 0.087            | 0.105                          | 1952                        | 40.9      | -82.9    | interg.           | AT1G54440 |      |                                     | ✓                       | ✓                             |    | 11 |
| GR_rootLength    | 1          | 20324050 | G         | A       | -12.100  | 3.164                 | 63          | 1.33E-04      | 0.0037                        | 0.003                          | 0.087            | 0.105                          | 1952                        | 40.9      | -82.9    | interg.           | AT1G54440 |      |                                     | ✓                       | ✓                             |    | 11 |
| bio18            | 1          | 23648407 | A         | C       | 6.830    | 1.987                 | 99          | 5.83E-04      | 0.0124                        | 0.047                          | 0.196            | 0.24                           | 1922                        | 41.7      | -85.3    | nonsyn Y->S       | AT1G63740 | 144  |                                     | ✓                       |                               |    | 46 |
| dirEquivalent    | 1          | 26052913 | A         | T       | -0.014   | 0.004                 | 63          | 5.30E-04      | 0.0052                        | 0.018                          | 0.185            | 0.224                          | 1922                        | 41.7      | -85.3    | interg.           |           |      |                                     | ✓                       |                               |    | 45 |
| GR_shootArea     | 1          | 29696198 | G         | A       | -121.000 | 33.911                | 63          | 3.68E-04      | 0.0096                        | 0.016                          | 0.278            | 0.329                          | 1922                        | 41.5      | -84.9    | interg.           |           |      |                                     | ✓                       |                               |    | 42 |

|                  |   |          |   |   |          |        |    |          |        |       |       |       |      |      |       |             |           |    |    |    |    |
|------------------|---|----------|---|---|----------|--------|----|----------|--------|-------|-------|-------|------|------|-------|-------------|-----------|----|----|----|----|
| bio16            | 1 | 29696198 | G | A | 5.250    | 1.377  | 94 | 1.39E-04 | 0.0632 | 0.016 | 0.278 | 0.329 | 1922 | 41.5 | -84.9 | interg.     |           | ✓  | 42 |    |    |
| bio18            | 1 | 29696198 | G | A | 6.340    | 1.569  | 94 | 5.36E-05 | 0.0124 | 0.004 | 0.278 | 0.329 | 1922 | 41.5 | -84.9 | interg.     |           | ✓  | 42 |    |    |
| GR_rootLength    | 1 | 30015381 | T | A | -12.100  | 3.164  | 63 | 1.33E-04 | 0.0037 | 0.003 | 0.087 | 0.105 | 1952 | 40.9 | -82.9 | interg.     |           | ✓  | ✓  | 10 |    |
| GR_shootArea     | 1 | 30015381 | T | A | -231.000 | 53.774 | 63 | 1.75E-05 | 0.0005 | 0.001 | 0.087 | 0.105 | 1952 | 40.9 | -82.9 | interg.     |           | ✓  | ✓  | 10 |    |
| GR_rootLength    | 1 | 30143319 | G | A | -12.100  | 3.164  | 63 | 1.33E-04 | 0.0037 | 0.003 | 0.088 | 0.105 | 1952 | 40.9 | -82.9 | interg.     |           | ✓  | ✓  | 9  |    |
| GR_shootArea     | 1 | 30143319 | G | A | -231.000 | 53.774 | 63 | 1.75E-05 | 0.0005 | 0.001 | 0.088 | 0.105 | 1952 | 40.9 | -82.9 | interg.     |           | ✓  | ✓  | 9  |    |
| dirEquivalent    | 2 | 358395   | C | T | -0.016   | 0.004  | 63 | 1.15E-04 | 0.0032 | 0.006 | 0.194 | 0.237 | 1922 | 41.7 | -85.3 | syn. V->V   | AT2G01820 | ✓  | ✓  | 43 |    |
| dirEquivalent    | 2 | 585918   | C | T | -0.016   | 0.004  | 63 | 1.15E-04 | 0.0032 | 0.006 | 0.194 | 0.237 | 1922 | 41.7 | -85.3 | syn. G->G   | AT2G02220 | ✓  | ✓  | 42 |    |
| dirEquivalent    | 2 | 1093203  | C | T | -0.016   | 0.004  | 63 | 1.15E-04 | 0.0032 | 0.006 | 0.194 | 0.237 | 1922 | 41.7 | -85.3 | interg.     |           | ✓  | ✓  | 41 |    |
| dirEquivalent    | 2 | 2176891  | T | C | -0.016   | 0.004  | 63 | 1.15E-04 | 0.0032 | 0.006 | 0.194 | 0.237 | 1922 | 41.7 | -85.3 | interg.     |           | ✓  | ✓  | 40 |    |
| GR_rootLength    | 2 | 3174832  | T | A | 6.340    | 1.869  | 63 | 6.97E-04 | 0.017  | 0.017 | 0.529 | 0.566 | 1879 | 41.3 | -84.3 | interg.     |           | ✓  |    | 0  |    |
| TotLen.EucLen    | 2 | 5285907  | C | A | -0.006   | 0.002  | 63 | 3.05E-04 | 0.0241 | 0.037 | 0.162 | 0.194 | 1922 | 41.5 | -85   | interg.     |           | ✓  | ✓  | 39 |    |
| dirEquivalent    | 2 | 5285907  | C | A | -0.019   | 0.005  | 63 | 2.64E-05 | 0.0032 | 0.001 | 0.162 | 0.194 | 1922 | 41.5 | -85   | interg.     |           | ✓  | ✓  | 39 |    |
| dirEquivalent    | 2 | 6034545  | C | T | -0.016   | 0.004  | 63 | 1.15E-04 | 0.0032 | 0.006 | 0.194 | 0.237 | 1922 | 41.7 | -85.3 | syn. S->S   | AT2G14247 | ✓  | ✓  | 38 |    |
| dirEquivalent    | 2 | 7047529  | G | T | -0.016   | 0.004  | 63 | 1.15E-04 | 0.0032 | 0.006 | 0.194 | 0.237 | 1922 | 41.7 | -85.3 | nonsyn P->A | AT2G16270 | 27 | ✓  | ✓  | 37 |
| dirEquivalent    | 2 | 7186220  | C | T | -0.016   | 0.004  | 63 | 1.15E-04 | 0.0032 | 0.006 | 0.194 | 0.237 | 1922 | 41.7 | -85.3 | intron      | AT2G16580 |    | ✓  | ✓  | 36 |
| dirEquivalent    | 2 | 10369545 | T | C | -0.016   | 0.004  | 63 | 1.15E-04 | 0.0032 | 0.006 | 0.194 | 0.237 | 1922 | 41.7 | -85.3 | interg.     |           | ✓  | ✓  | 35 |    |
| dirEquivalent    | 2 | 10495275 | A | C | -0.016   | 0.004  | 63 | 1.15E-04 | 0.0032 | 0.006 | 0.196 | 0.237 | 1922 | 41.7 | -85.3 | intron      | AT2G24680 |    | ✓  | ✓  | 34 |
| dirEquivalent    | 2 | 11346211 | C | A | -0.014   | 0.004  | 63 | 5.30E-04 | 0.0052 | 0.018 | 0.186 | 0.227 | 1922 | 41.7 | -85.3 | interg.     |           | ✓  |    | 33 |    |
| dirEquivalent    | 2 | 12415084 | T | A | -0.014   | 0.004  | 63 | 5.30E-04 | 0.0052 | 0.018 | 0.186 | 0.227 | 1922 | 41.7 | -85.3 | intron      | AT2G28900 |    | ✓  |    | 32 |
| dirEquivalent    | 2 | 12876361 | A | C | -0.015   | 0.004  | 63 | 1.56E-04 | 0.0041 | 0.006 | 0.262 | 0.29  | 1922 | 41.7 | -84.6 | interg.     |           | ✓  |    | 31 |    |
| gravitropicScore | 2 | 12876361 | A | C | -0.021   | 0.006  | 63 | 1.08E-03 | 0.0651 | 0.027 | 0.262 | 0.29  | 1922 | 41.7 | -84.6 | interg.     |           | ✓  |    | 31 |    |
| bio13            | 2 | 14417366 | A | G | 3.990    | 0.959  | 64 | 3.22E-05 | 0.0147 | 0.004 | 0.077 | 0     | 1890 | 39.5 | -77.9 | interg.     |           | ✓  |    | 1  |    |
| dirEquivalent    | 2 | 15278350 | A | G | -0.014   | 0.004  | 63 | 5.30E-04 | 0.0052 | 0.018 | 0.186 | 0.227 | 1922 | 41.7 | -85.3 | interg.     |           | ✓  |    | 30 |    |
| GR_shootArea     | 2 | 16039488 | T | G | -231.000 | 53.774 | 63 | 1.75E-05 | 0.0005 | 0.001 | 0.087 | 0.105 | 1952 | 40.9 | -82.9 | 3' UTR      | AT2G38290 |    | ✓  | ✓  | 8  |
| GR_rootLength    | 2 | 16039488 | T | G | -12.100  | 3.164  | 63 | 1.33E-04 | 0.0037 | 0.003 | 0.087 | 0.105 | 1952 | 40.9 | -82.9 | 3' UTR      | AT2G38290 |    | ✓  | ✓  | 8  |
| GR_rootLength    | 2 | 16247290 | G | T | -12.100  | 3.164  | 63 | 1.33E-04 | 0.0037 | 0.003 | 0.088 | 0.105 | 1952 | 40.9 | -82.9 | nonsyn A->G | AT2G38910 | 60 | ✓  | ✓  | 7  |
| GR_shootArea     | 2 | 16247290 | G | T | -231.000 | 53.774 | 63 | 1.75E-05 | 0.0005 | 0.001 | 0.088 | 0.105 | 1952 | 40.9 | -82.9 | nonsyn A->G | AT2G38910 | 60 | ✓  | ✓  | 7  |
| dirEquivalent    | 2 | 16333662 | G | A | -0.014   | 0.004  | 63 | 5.30E-04 | 0.0052 | 0.018 | 0.186 | 0.227 | 1922 | 41.7 | -85.3 | nonsyn A->G | AT2G39160 | 60 | ✓  |    | 29 |
| dirEquivalent    | 3 | 2500258  | C | A | -0.016   | 0.004  | 63 | 1.15E-04 | 0.0032 | 0.006 | 0.194 | 0.237 | 1922 | 41.7 | -85.3 | syn. K->K   | AT3G07830 |    | ✓  | ✓  | 28 |
| dirEquivalent    | 3 | 3154804  | C | T | -0.016   | 0.004  | 63 | 1.15E-04 | 0.0032 | 0.006 | 0.194 | 0.237 | 1922 | 41.7 | -85.3 | interg.     |           | ✓  | ✓  | 27 |    |
| dirEquivalent    | 3 | 3629794  | C | T | -0.016   | 0.004  | 63 | 1.15E-04 | 0.0032 | 0.006 | 0.194 | 0.237 | 1922 | 41.7 | -85.3 | intron      | AT3G11530 |    | ✓  | ✓  | 26 |
| dirEquivalent    | 3 | 4269626  | G | T | -0.016   | 0.004  | 63 | 1.15E-04 | 0.0032 | 0.006 | 0.194 | 0.237 | 1922 | 41.7 | -85.3 | 5' UTR      | AT3G13229 |    | ✓  | ✓  | 25 |
| GR_shootArea     | 3 | 8873116  | C | T | -231.000 | 53.774 | 63 | 1.75E-05 | 0.0005 | 0.001 | 0.097 | 0.118 | 1952 | 40.9 | -81.9 | interg.     |           | ✓  | ✓  | 6  |    |
| GR_rootLength    | 3 | 8873116  | C | T | -12.100  | 3.164  | 63 | 1.33E-04 | 0.0037 | 0.003 | 0.097 | 0.118 | 1952 | 40.9 | -81.9 | interg.     |           | ✓  | ✓  | 6  |    |

|                  |   |          |   |   |          |        |    |          |        |       |       |       |      |      |       |             |           |     |   |    |
|------------------|---|----------|---|---|----------|--------|----|----------|--------|-------|-------|-------|------|------|-------|-------------|-----------|-----|---|----|
| GR_rootLength    | 3 | 11259214 | A | T | -12.100  | 3.164  | 63 | 1.33E-04 | 0.0037 | 0.003 | 0.088 | 0.105 | 1952 | 40.9 | -82.9 | interg.     |           | ✓   | ✓ | 5  |
| GR_shootArea     | 3 | 11259214 | A | T | -231.000 | 53.774 | 63 | 1.75E-05 | 0.0005 | 0.001 | 0.088 | 0.105 | 1952 | 40.9 | -82.9 | interg.     |           | ✓   | ✓ | 5  |
| bio8             | 3 | 11873293 | A | G | 37.800   | 8.736  | 65 | 1.52E-05 | 0.0069 | 0.006 | 0.939 | 1     | 1890 | 41.8 | -83.7 | transposon  | AT3G30219 | ✓   |   | 0  |
| GR_rootLength    | 3 | 15050751 | G | A | -12.100  | 3.164  | 63 | 1.33E-04 | 0.0037 | 0.003 | 0.108 | 0.105 | 1888 | 40.2 | -82.5 | interg.     |           | ✓   | ✓ | 4  |
| GR_shootArea     | 3 | 15050751 | G | A | -231.000 | 53.774 | 63 | 1.75E-05 | 0.0005 | 0.001 | 0.108 | 0.105 | 1888 | 40.2 | -82.5 | interg.     |           | ✓   | ✓ | 4  |
| dirEquivalent    | 3 | 17164638 | C | A | -0.014   | 0.004  | 63 | 5.30E-04 | 0.0052 | 0.018 | 0.19  | 0.227 | 1922 | 41.7 | -85.3 | interg.     |           | ✓   |   | 24 |
| bio18            | 4 | 279210   | T | G | 6.830    | 1.987  | 99 | 5.83E-04 | 0.0124 | 0.047 | 0.196 | 0.24  | 1922 | 41.7 | -85.3 | interg.     |           | ✓   |   | 22 |
| bio11            | 4 | 1732480  | T | A | -5.550   | 1.564  | 79 | 3.89E-04 | 0.0195 | 0.045 | 0.063 | 0.068 | 2002 | 41   | -87.5 | interg.     |           | ✓   |   | 2  |
| bio4             | 4 | 1732480  | T | A | 224.000  | 63.967 | 79 | 4.67E-04 | 0.0128 | 0.044 | 0.063 | 0.068 | 2002 | 41   | -87.5 | interg.     |           | ✓   |   | 2  |
| dirEquivalent    | 4 | 3355152  | C | G | -0.014   | 0.004  | 63 | 4.45E-04 | 0.0052 | 0.016 | 0.204 | 0.25  | 1922 | 41.7 | -85.4 | interg.     |           | ✓   |   | 21 |
| bio18            | 4 | 3355152  | C | G | 6.850    | 1.944  | ## | 4.25E-04 | 0.0124 | 0.035 | 0.204 | 0.25  | 1922 | 41.7 | -85.4 | interg.     |           | ✓   |   | 21 |
| dirEquivalent    | 4 | 3355946  | G | C | -0.014   | 0.004  | 63 | 4.45E-04 | 0.0052 | 0.016 | 0.204 | 0.25  | 1922 | 41.7 | -85.4 | interg.     |           | ✓   |   | 20 |
| bio18            | 4 | 3355946  | G | C | 6.850    | 1.944  | ## | 4.25E-04 | 0.0124 | 0.035 | 0.204 | 0.25  | 1922 | 41.7 | -85.4 | interg.     |           | ✓   |   | 20 |
| dirEquivalent    | 4 | 4228138  | A | G | -0.014   | 0.004  | 63 | 4.45E-04 | 0.0052 | 0.016 | 0.196 | 0.24  | 1922 | 41.7 | -85.3 | transposon  | AT4G07440 | ✓   |   | 19 |
| bio18            | 4 | 4228138  | A | G | 6.830    | 1.987  | 99 | 5.83E-04 | 0.0124 | 0.047 | 0.196 | 0.24  | 1922 | 41.7 | -85.3 | transposon  | AT4G07440 | ✓   |   | 19 |
| dirEquivalent    | 4 | 9046942  | G | C | -0.014   | 0.004  | 63 | 4.45E-04 | 0.0052 | 0.016 | 0.204 | 0.25  | 1922 | 41.7 | -85.4 | nonsyn H->Q | AT4G15960 | 24  | ✓ | 18 |
| bio18            | 4 | 9046942  | G | C | 6.850    | 1.944  | ## | 4.25E-04 | 0.0124 | 0.035 | 0.204 | 0.25  | 1922 | 41.7 | -85.4 | nonsyn H->Q | AT4G15960 | 24  | ✓ | 18 |
| dirEquivalent    | 4 | 11948961 | T | A | -0.014   | 0.004  | 63 | 4.45E-04 | 0.0052 | 0.016 | 0.198 | 0.25  | 1952 | 41.7 | -85.3 | interg.     |           | ✓   |   | 17 |
| dirEquivalent    | 4 | 12365323 | C | T | -0.014   | 0.004  | 63 | 4.45E-04 | 0.0052 | 0.016 | 0.204 | 0.25  | 1922 | 41.7 | -85.4 | interg.     |           | ✓   |   | 16 |
| bio18            | 4 | 12365323 | C | T | 6.850    | 1.944  | ## | 4.25E-04 | 0.0124 | 0.035 | 0.204 | 0.25  | 1922 | 41.7 | -85.4 | interg.     |           | ✓   |   | 16 |
| dirEquivalent    | 4 | 15646341 | C | A | -0.014   | 0.004  | 63 | 4.45E-04 | 0.0052 | 0.016 | 0.206 | 0.25  | 1922 | 41.7 | -85.4 | syn. E->E   | AT4G32410 |     | ✓ | 15 |
| bio18            | 4 | 15646341 | C | A | 6.720    | 1.936  | 99 | 5.14E-04 | 0.0124 | 0.042 | 0.206 | 0.25  | 1922 | 41.7 | -85.4 | syn. E->E   | AT4G32410 |     | ✓ | 15 |
| dirEquivalent    | 4 | 15845001 | A | T | -0.014   | 0.004  | 63 | 4.45E-04 | 0.0052 | 0.016 | 0.194 | 0.25  | 1922 | 41.8 | -85.9 | 3' UTR      | AT4G32840 |     | ✓ | 14 |
| dirEquivalent    | 4 | 18249171 | T | A | -0.014   | 0.004  | 63 | 4.45E-04 | 0.0052 | 0.016 | 0.274 | 0.328 | 1922 | 41.8 | -85.9 | interg.     |           | ✓   |   | 13 |
| bio18            | 4 | 18249171 | T | A | 6.910    | 2.005  | 71 | 5.62E-04 | 0.0124 | 0.047 | 0.274 | 0.328 | 1922 | 41.8 | -85.9 | interg.     |           | ✓   |   | 13 |
| bio18            | 5 | 4245213  | A | T | 6.830    | 1.987  | 99 | 5.83E-04 | 0.0124 | 0.047 | 0.196 | 0.24  | 1922 | 41.7 | -85.3 | syn. I->I   | AT5G13260 |     | ✓ | 12 |
| bio18            | 5 | 4500202  | G | A | 6.830    | 1.987  | 99 | 5.83E-04 | 0.0124 | 0.047 | 0.196 | 0.24  | 1922 | 41.7 | -85.3 | nonsyn A->G | AT5G13950 | 60  | ✓ | 11 |
| dirEquivalent    | 5 | 4797923  | A | T | -0.014   | 0.004  | 63 | 5.30E-04 | 0.0052 | 0.018 | 0.188 | 0.227 | 1922 | 41.7 | -85.3 | transposon  | AT5G14830 |     | ✓ | 10 |
| dirEquivalent    | 5 | 4797976  | G | A | -0.014   | 0.004  | 63 | 5.30E-04 | 0.0052 | 0.018 | 0.257 | 0.293 | 1922 | 41.7 | -85.3 | transposon  | AT5G14830 |     | ✓ | 10 |
| dirEquivalent    | 5 | 4798526  | A | G | -0.014   | 0.004  | 63 | 5.30E-04 | 0.0052 | 0.018 | 0.339 | 0.362 | 1922 | 41.7 | -85.3 | interg.     |           | ✓   |   | 9  |
| gravitropicScore | 5 | 6508329  | A | G | -0.020   | 0.006  | 63 | 5.20E-04 | 0.0651 | 0.008 | 0.35  | 0.447 | 1922 | 42   | -85   | nonsyn C->W | AT5G19330 | 215 | ✓ | 0  |
| dirEquivalent    | 5 | 11090365 | T | A | -0.014   | 0.004  | 63 | 5.30E-04 | 0.0052 | 0.018 | 0.186 | 0.224 | 1922 | 41.7 | -85.3 | TE          | AT5G29037 |     | ✓ | 4  |
| dirEquivalent    | 5 | 12312975 | C | G | -0.014   | 0.004  | 63 | 5.30E-04 | 0.0052 | 0.018 | 0.185 | 0.224 | 1922 | 41.7 | -85.3 | TE          | AT5G32630 |     | ✓ | 3  |
| dirEquivalent    | 5 | 12358159 | C | T | -0.014   | 0.004  | 63 | 5.30E-04 | 0.0052 | 0.018 | 0.186 | 0.224 | 1922 | 41.7 | -85.3 | transposon  | AT5G32825 |     | ✓ | 2  |
| dirEquivalent    | 5 | 12409027 | G | A | -0.014   | 0.004  | 63 | 5.30E-04 | 0.0052 | 0.018 | 0.185 | 0.224 | 1922 | 41.7 | -85.3 | interg.     |           | ✓   |   | 1  |

|               |   |          |   |   |          |        |    |          |        |       |       |       |      |      |       |         |           |   |   |   |
|---------------|---|----------|---|---|----------|--------|----|----------|--------|-------|-------|-------|------|------|-------|---------|-----------|---|---|---|
| GR_rootLength | 5 | 16024197 | A | T | -12.100  | 3.164  | 63 | 1.33E-04 | 0.0037 | 0.003 | 0.098 | 0.118 | 1952 | 40.9 | -81.9 | intron  | AT5G40020 | ✓ | ✓ | 2 |
| GR_shootArea  | 5 | 16024197 | A | T | -231.000 | 53.774 | 63 | 1.75E-05 | 0.0005 | 0.001 | 0.098 | 0.118 | 1952 | 40.9 | -81.9 | intron  | AT5G40020 | ✓ | ✓ | 2 |
| GR_shootArea  | 5 | 16109431 | G | A | -231.000 | 53.774 | 63 | 1.75E-05 | 0.0005 | 0.001 | 0.865 | 0.877 | 1993 | 42.2 | -84.4 | interg. |           | ✓ | ✓ | 1 |
| GR_rootLength | 5 | 16109431 | G | A | -12.100  | 3.164  | 63 | 1.33E-04 | 0.0037 | 0.003 | 0.865 | 0.877 | 1993 | 42.2 | -84.4 | interg. |           | ✓ | ✓ | 1 |
| dirEquivalent | 5 | 19099082 | G | C | -0.014   | 0.004  | 63 | 5.30E-04 | 0.0052 | 0.018 | 0.186 | 0.227 | 1922 | 41.7 | -85.3 | interg. |           | ✓ |   | 0 |
| GR_rootLength | 5 | 20388107 | A | T | -10.700  | 3.164  | 63 | 6.94E-04 | 0.017  | 0.017 | 0.099 | 0.12  | 2002 | 41   | -86.6 | interg. |           | ✓ |   | 0 |

# Data Appendix S1

## GR\_rootLength

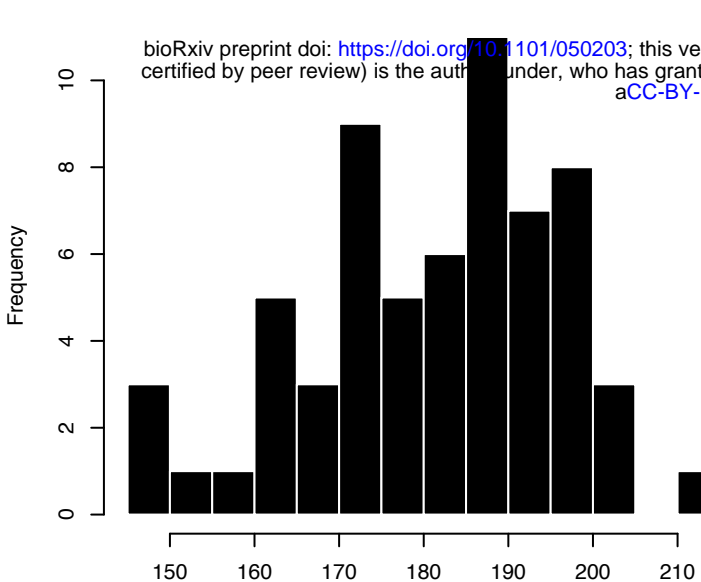

## lambda 0.983

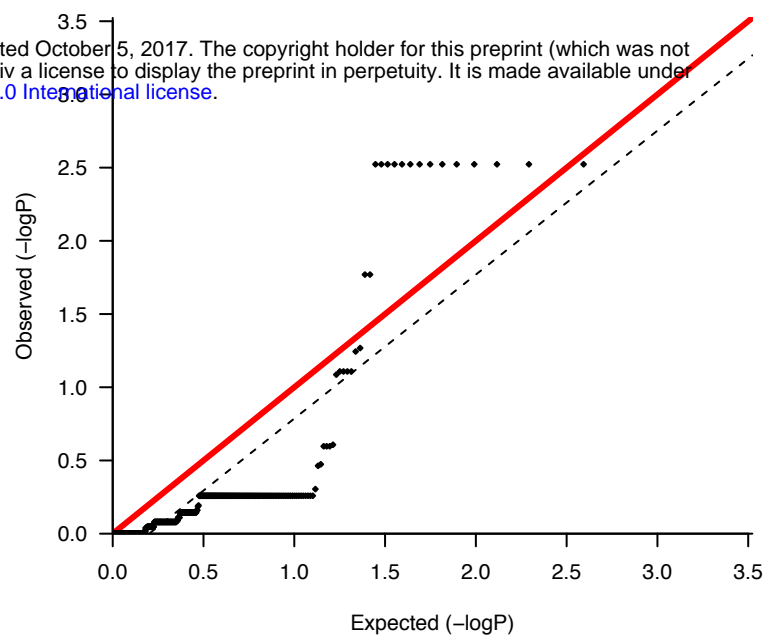

## GR\_shootArea

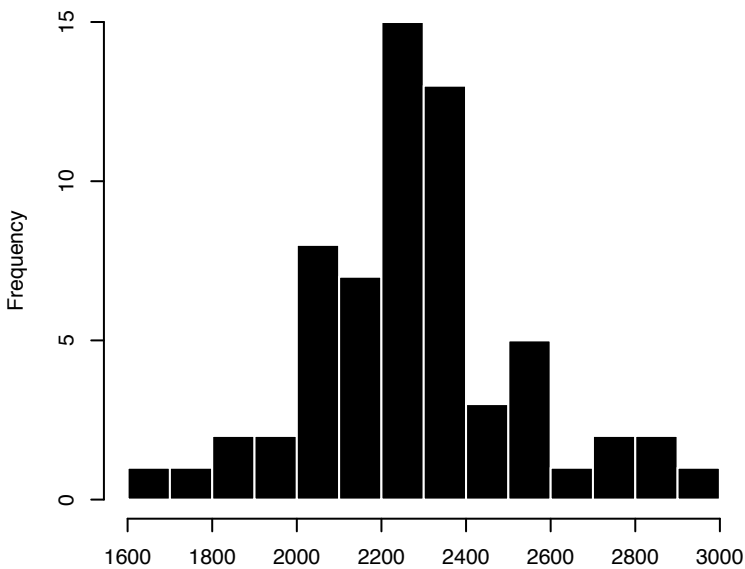

## lambda 1.383

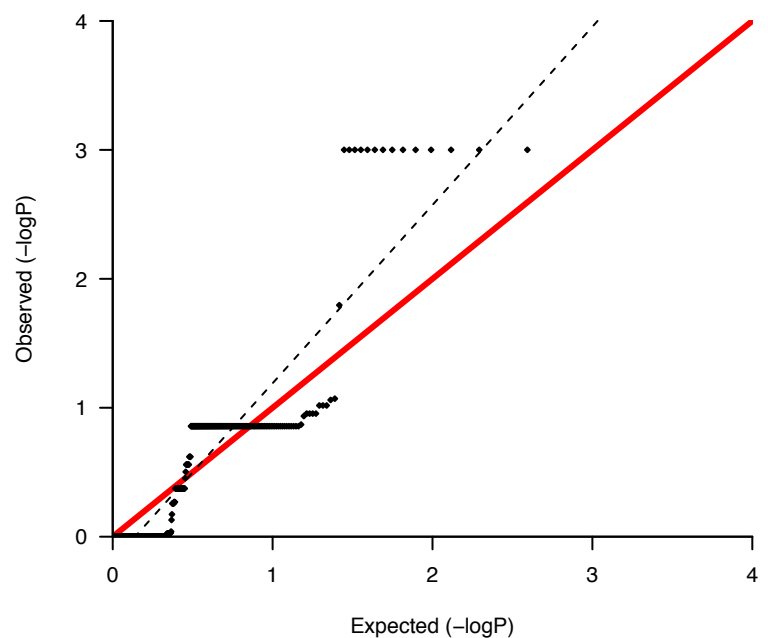

## rootLength

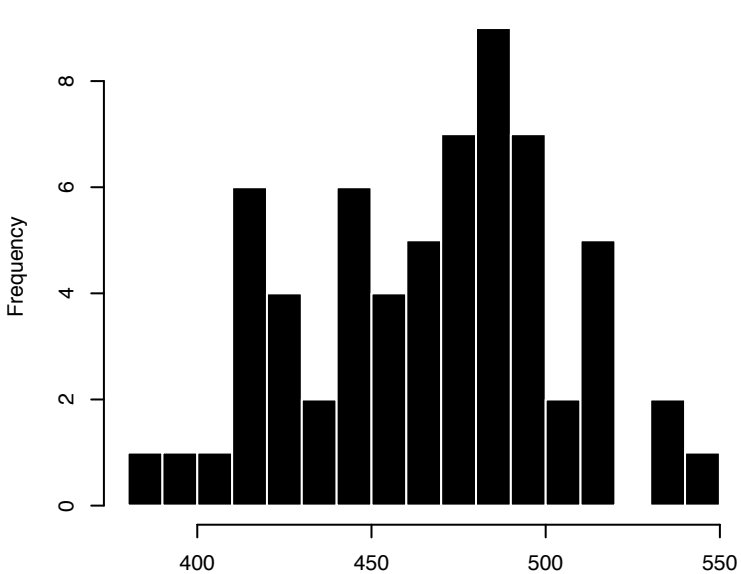

## lambda 0.244

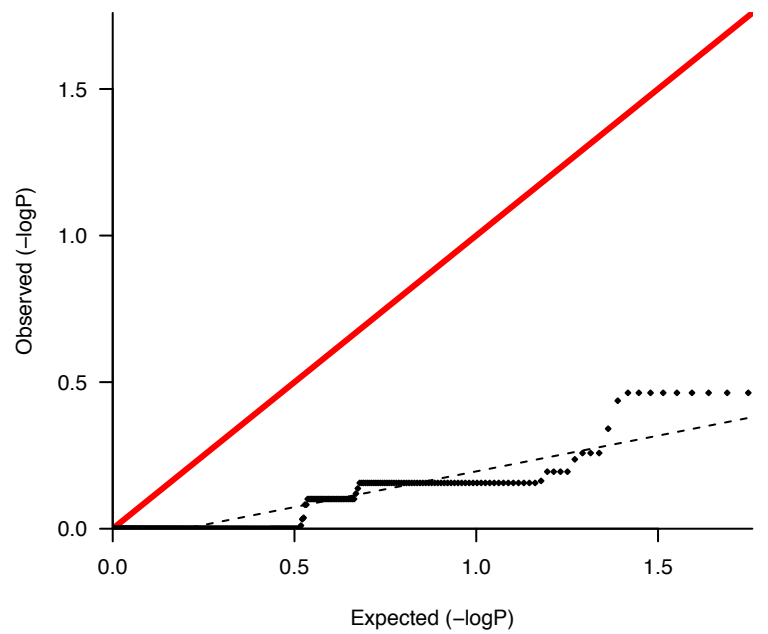



### dirEquivalent

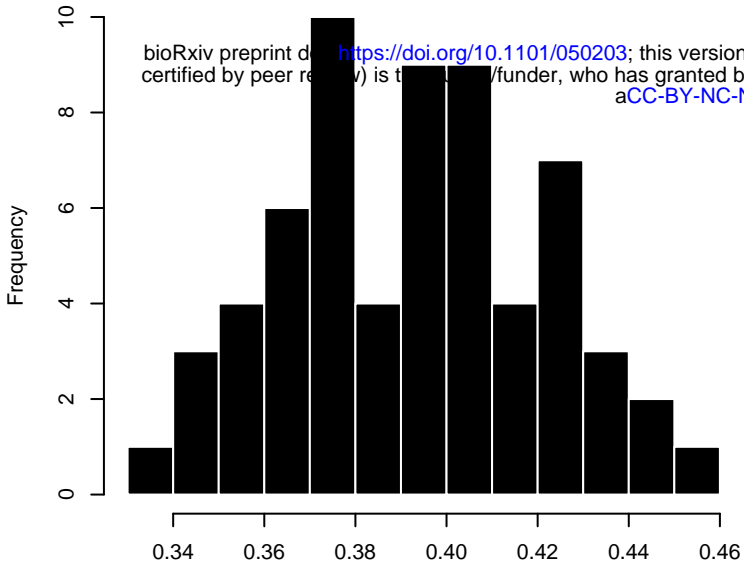

### lambda 1.355

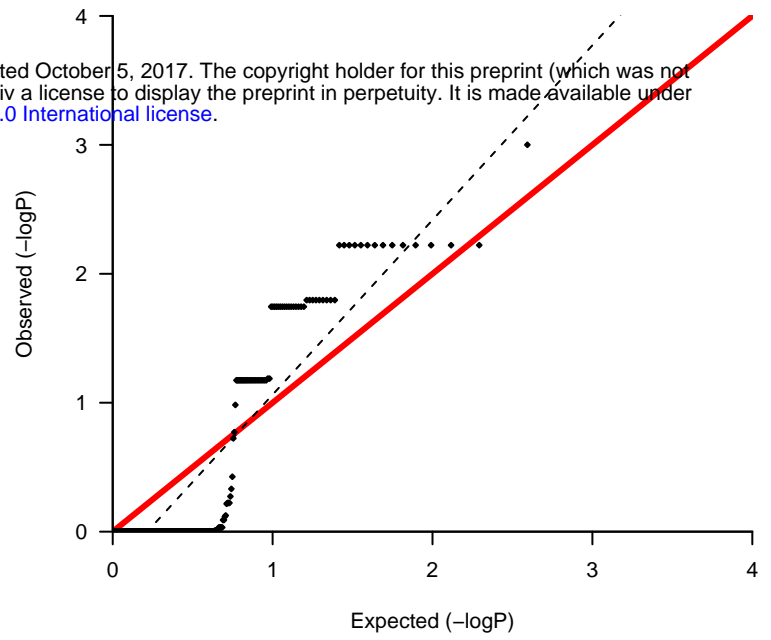

### stdDevXY

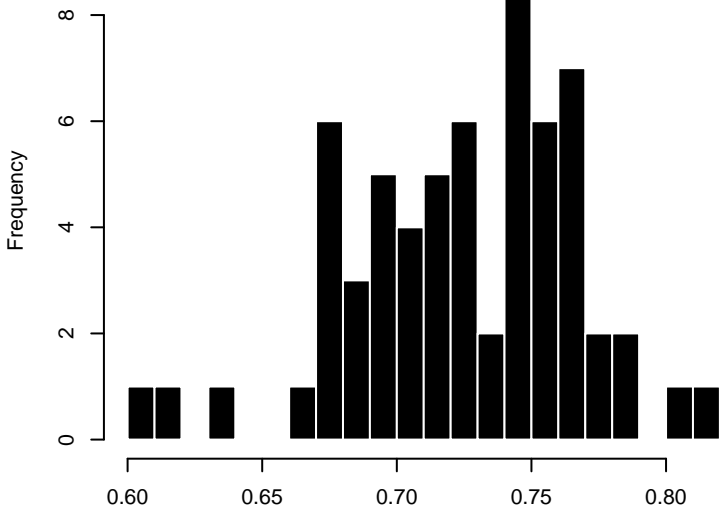

### lambda 0.481

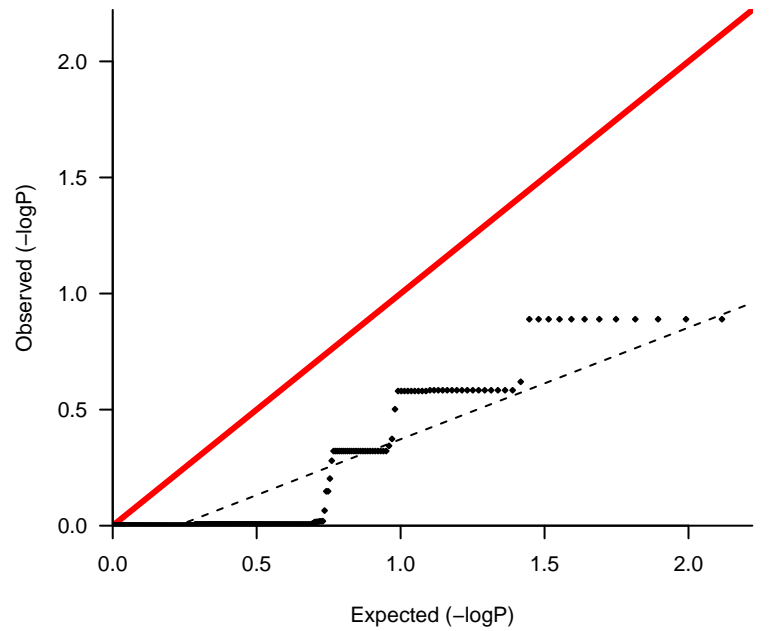

### meanRootWidth

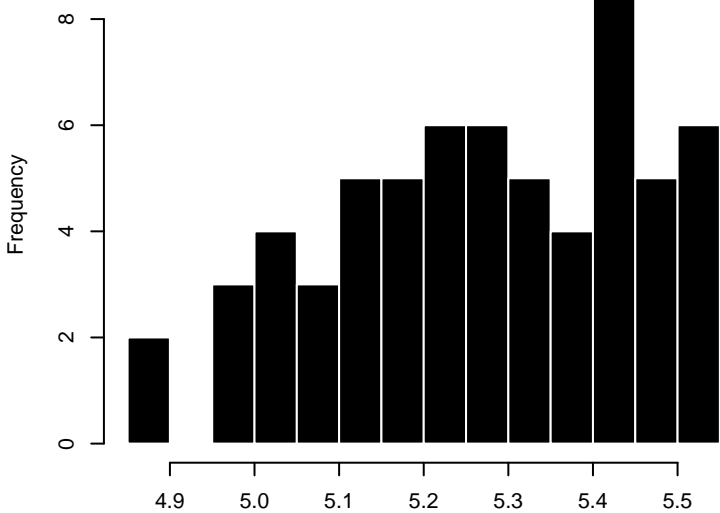

### lambda 0.054

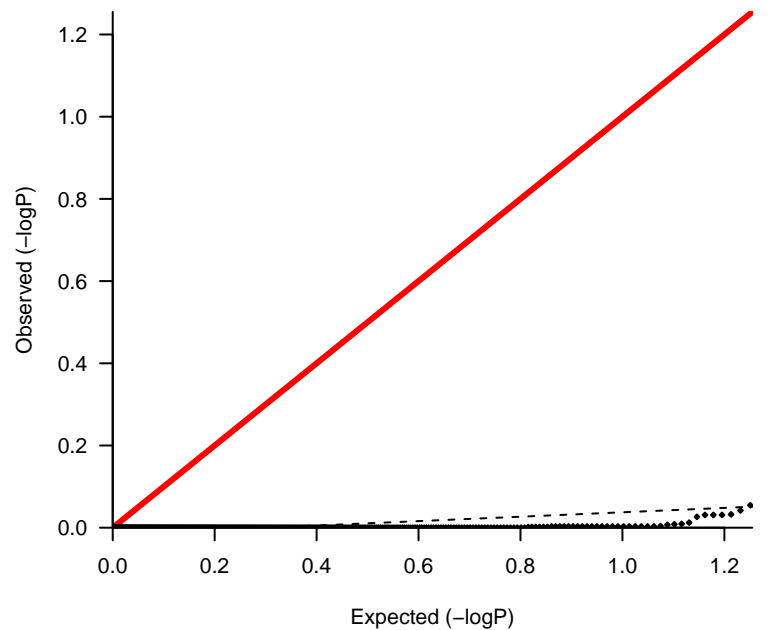

**rootWidth20**

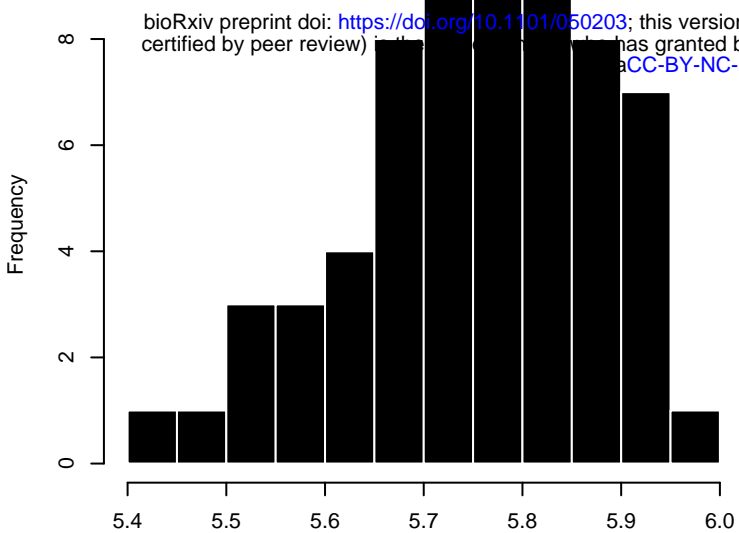

**lambda 0.002**

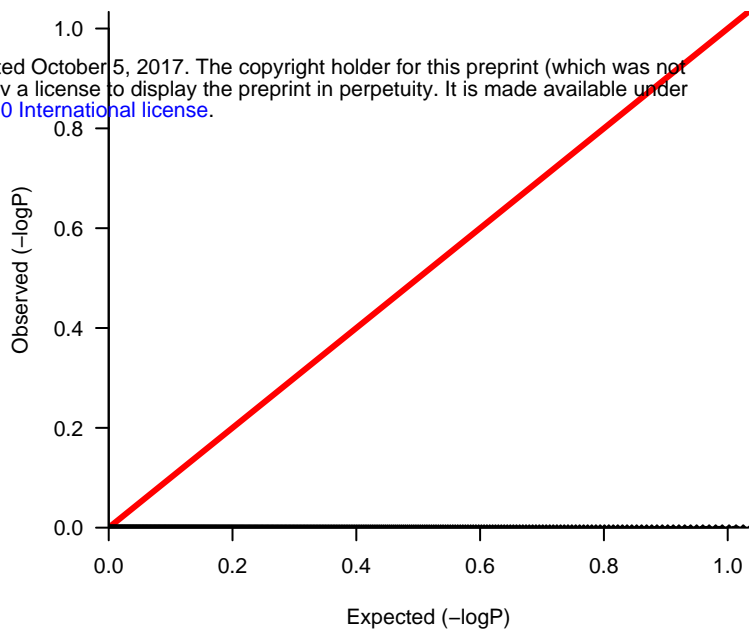

**rootWidth40**

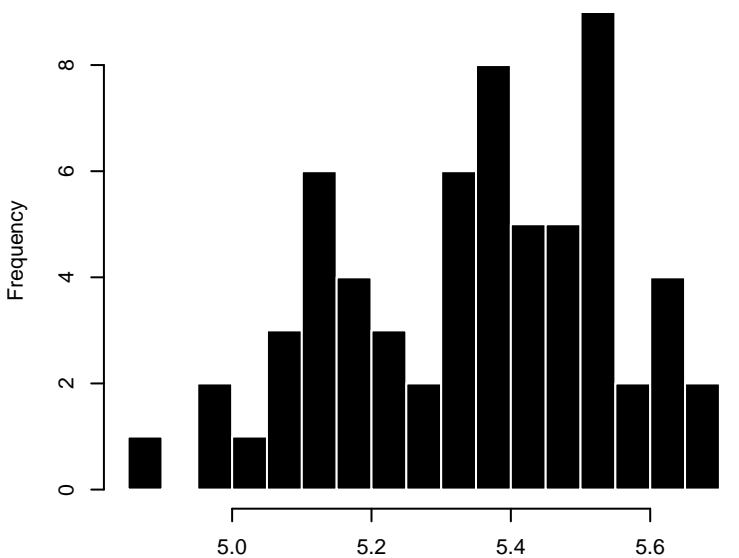

**lambda 0.059**

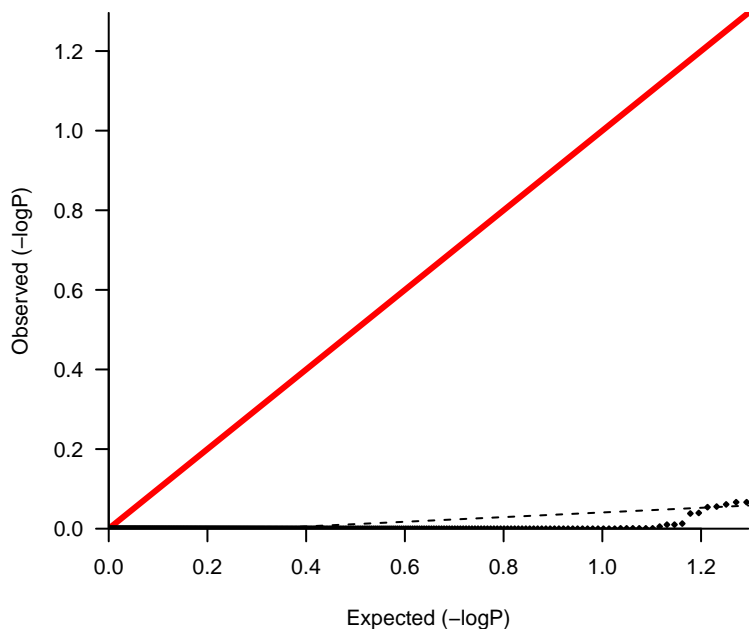

**rootWidth60**

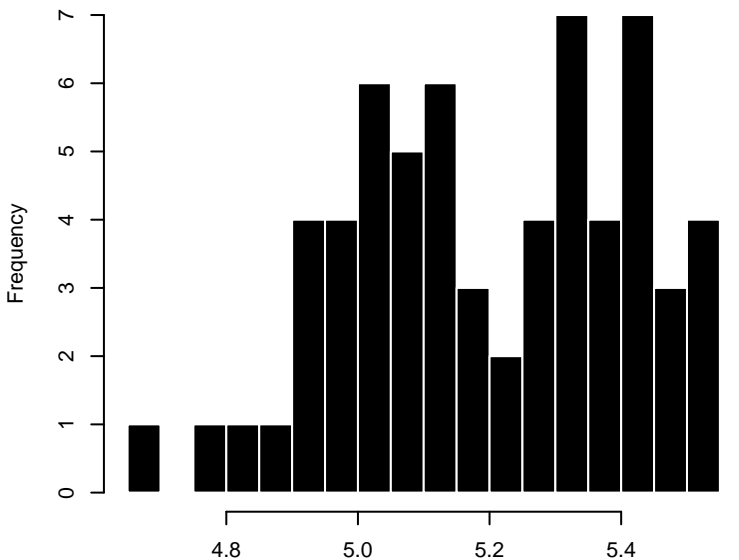

**lambda 0.089**

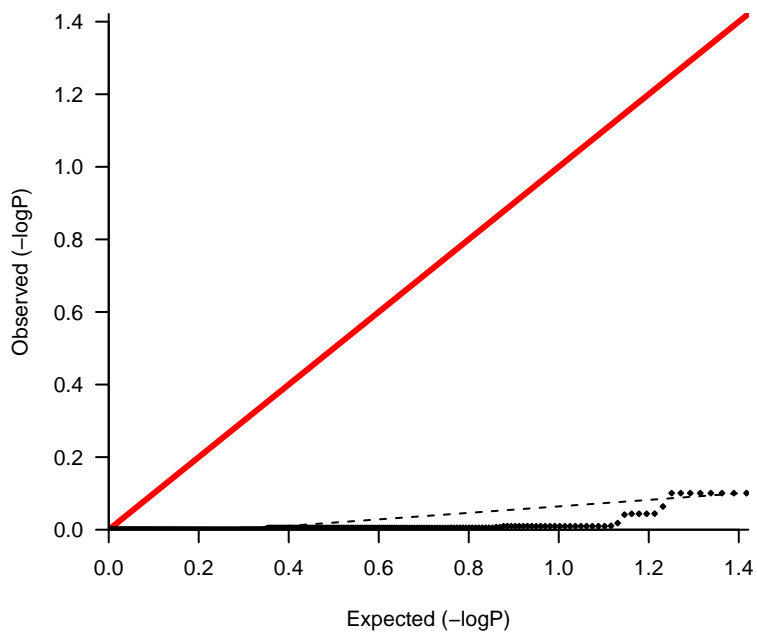

**rootWidth80**

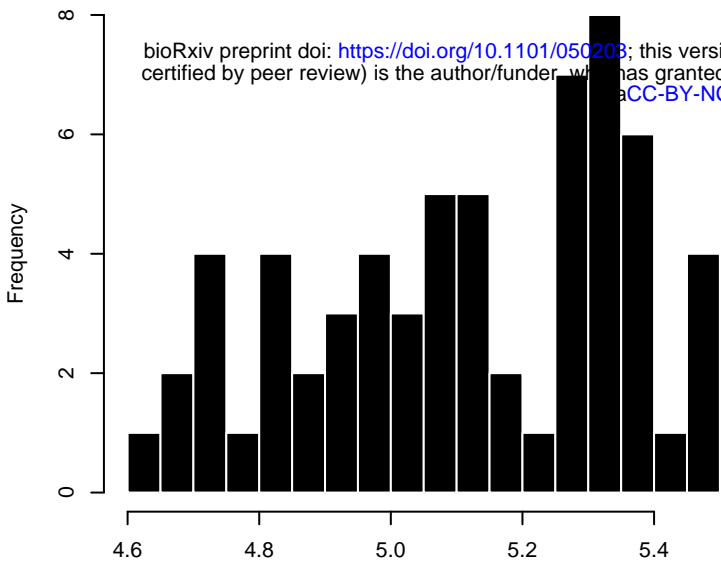

**lambda 0.068**

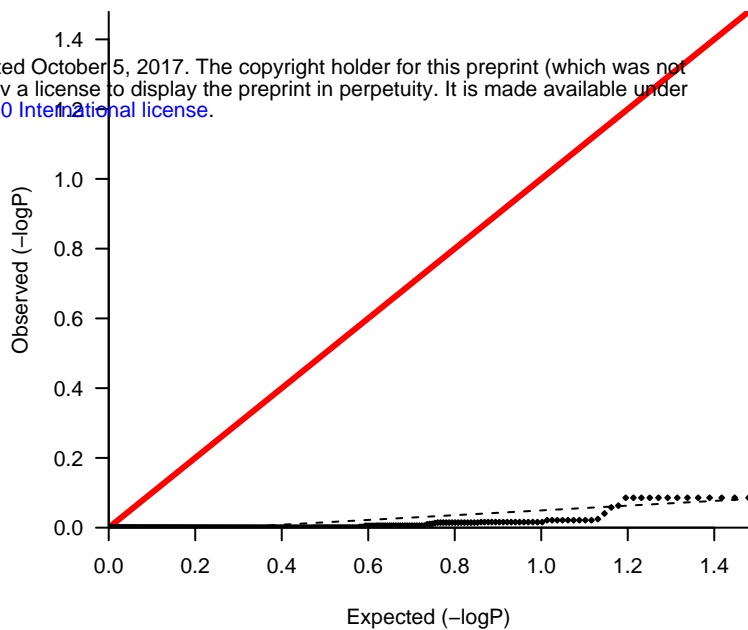

**rootWidth100**

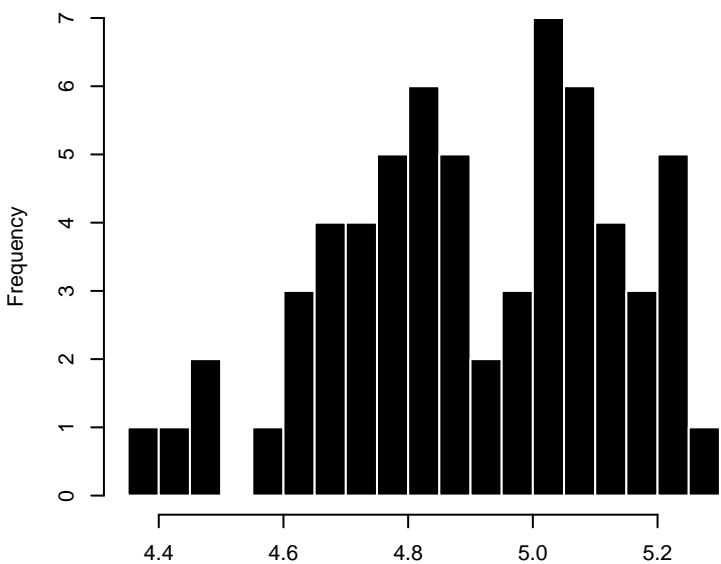

**lambda 0.04**

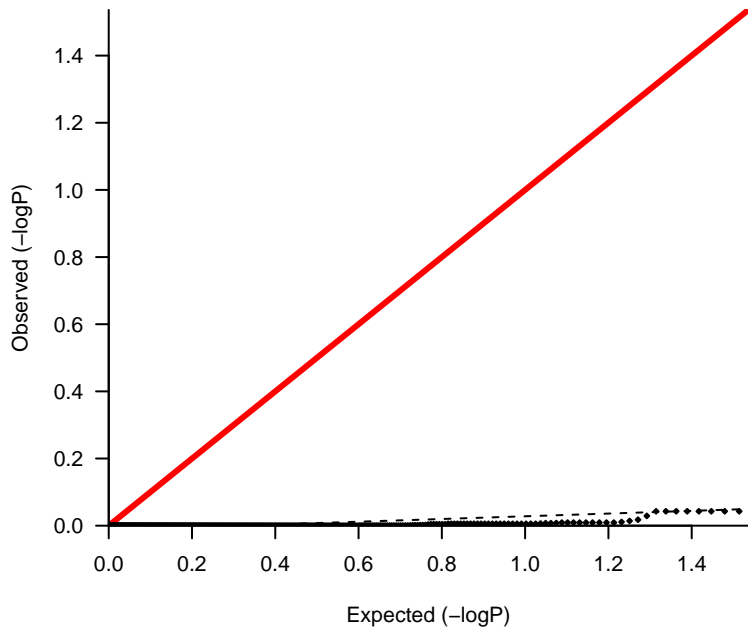

**gravitropicDir**

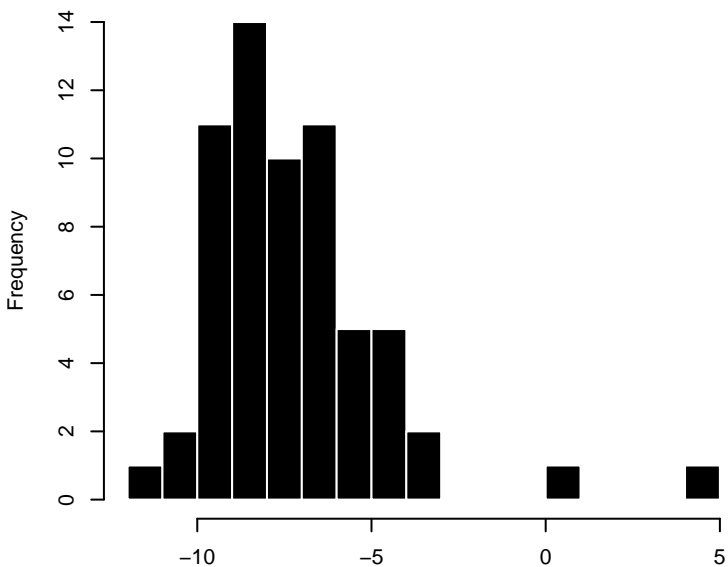

**lambda 0.059**

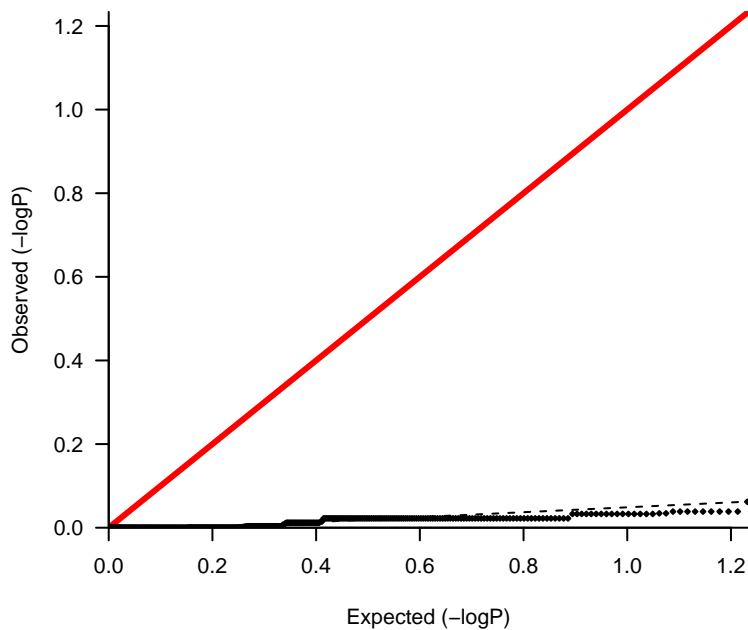

### gravitropicScore

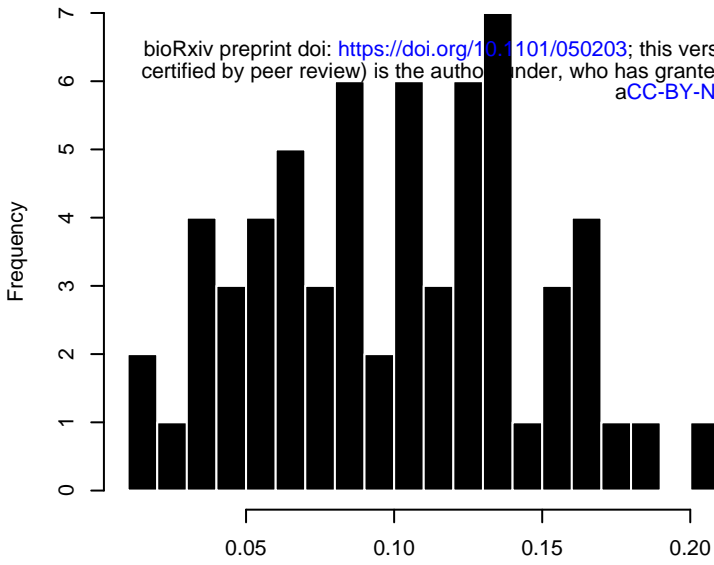

### lambda 0.478

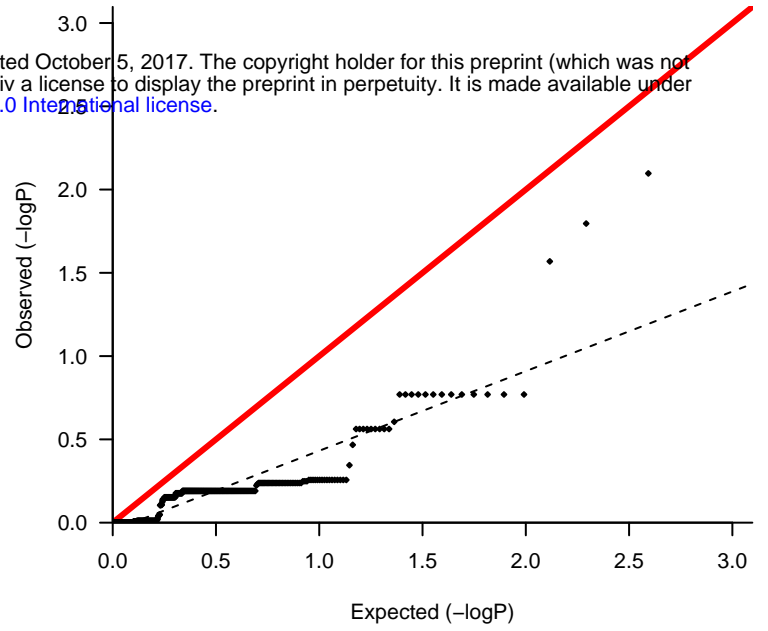

### TotLen.EucLen

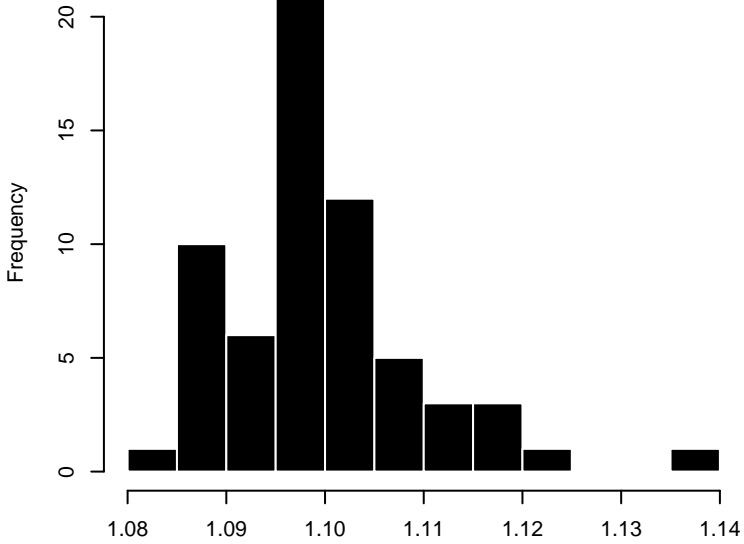

### lambda 0.685

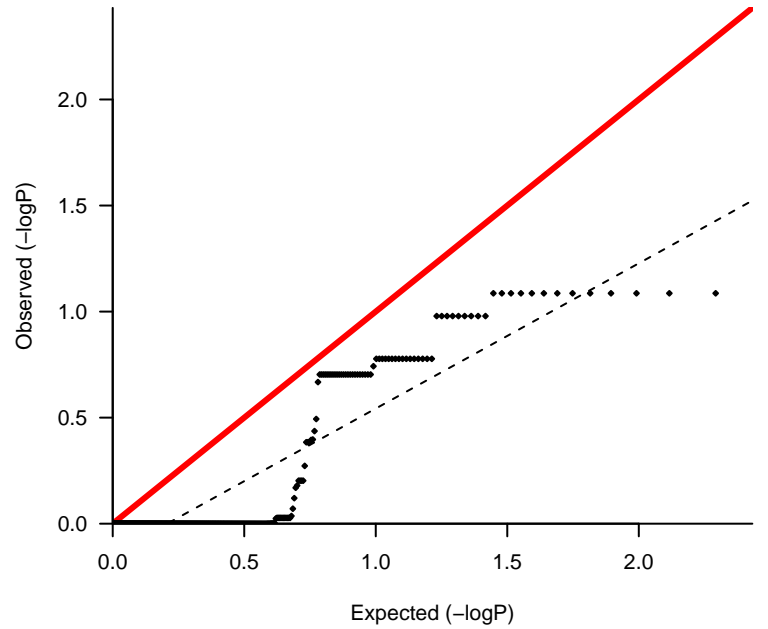

### GR.TL

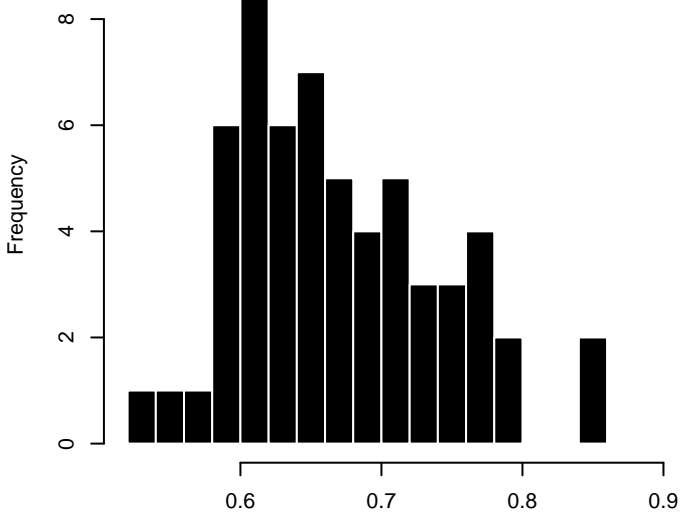

### lambda 0.036

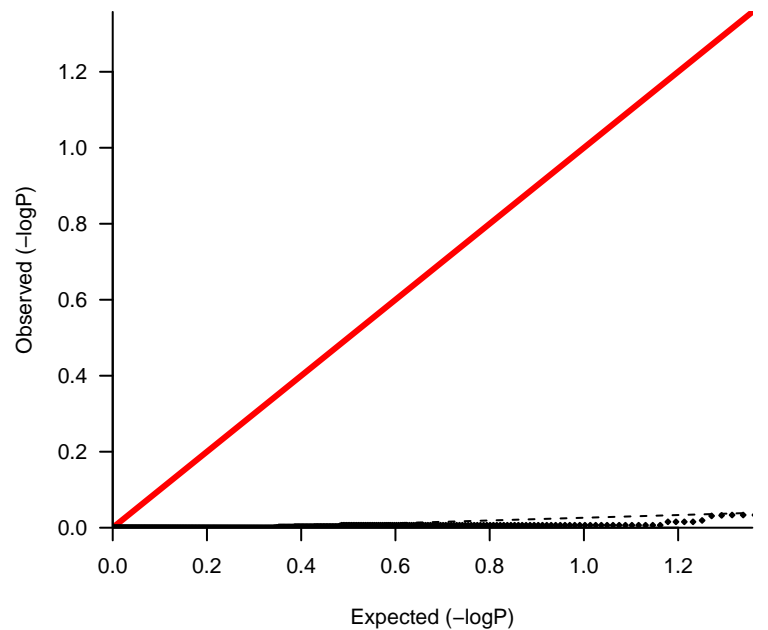

seed\_size

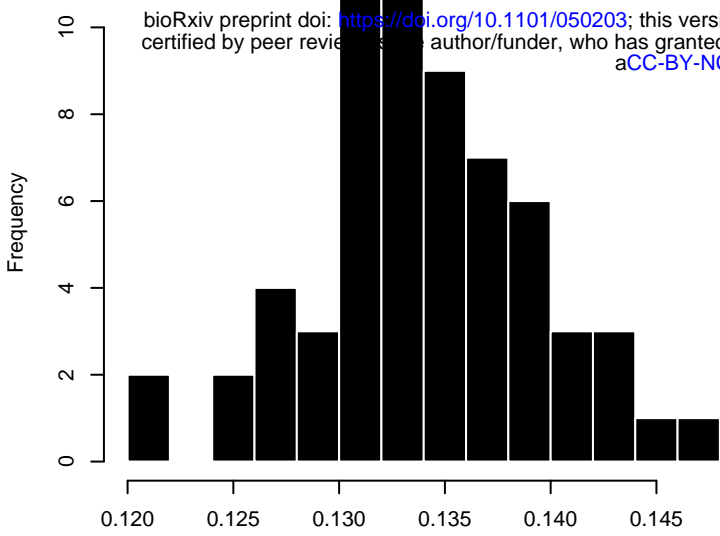

lambda 0.279

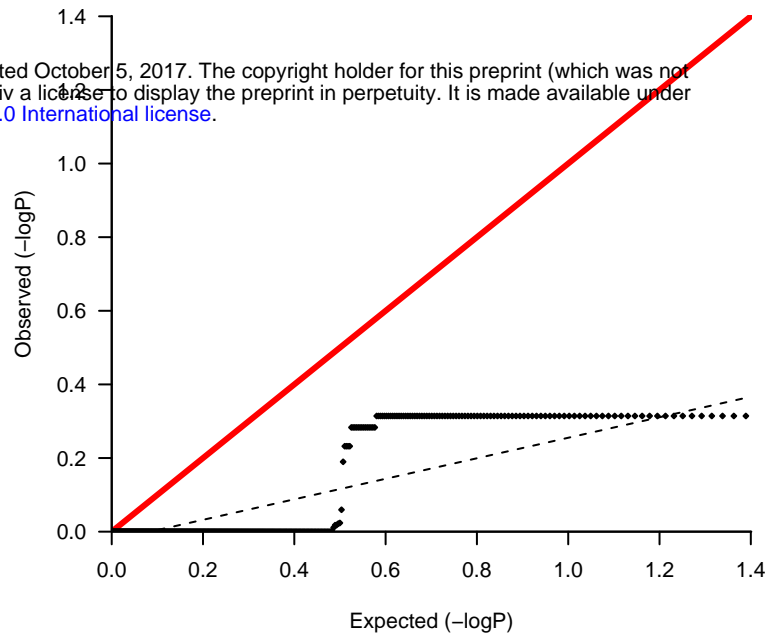

FT\_V0

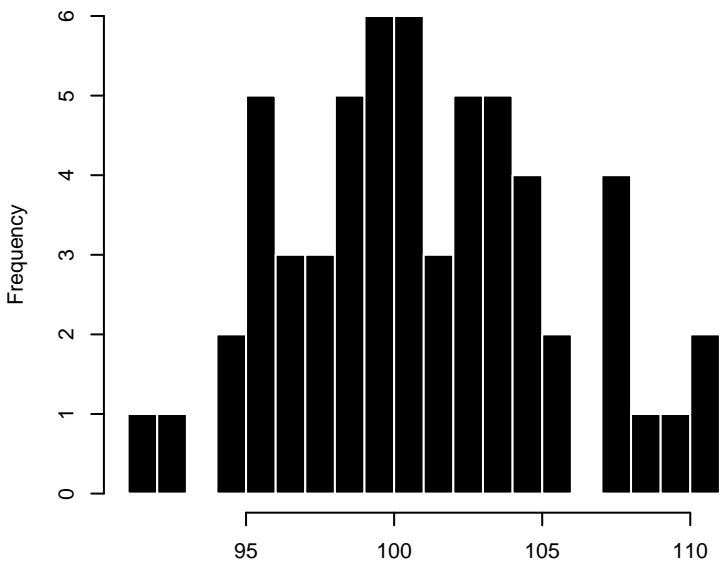

lambda 0.012

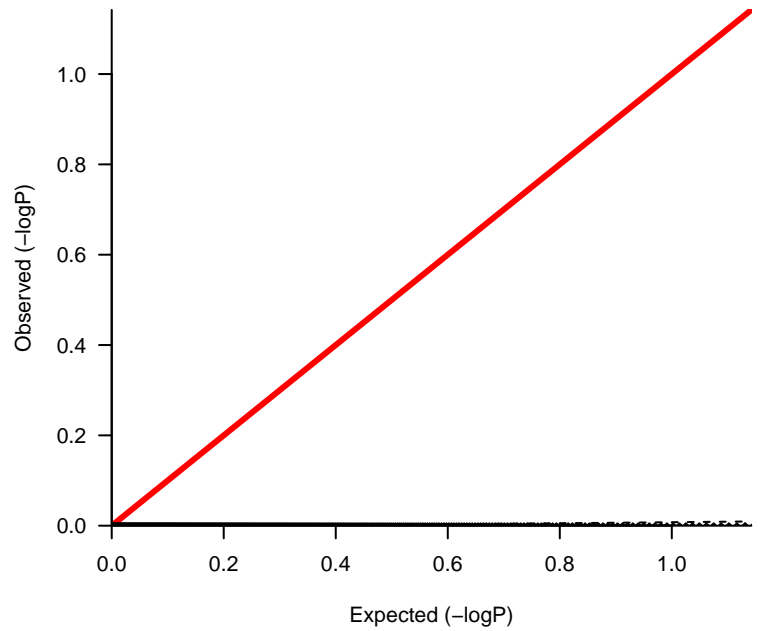

FT\_V1

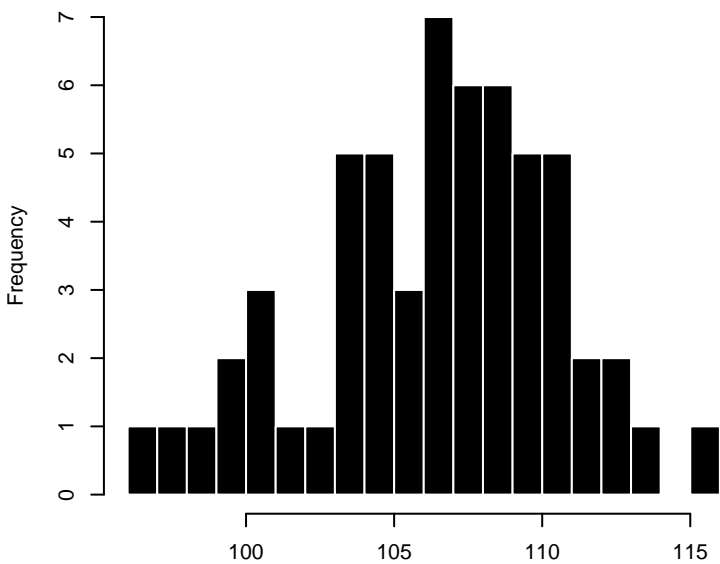

lambda 0.434

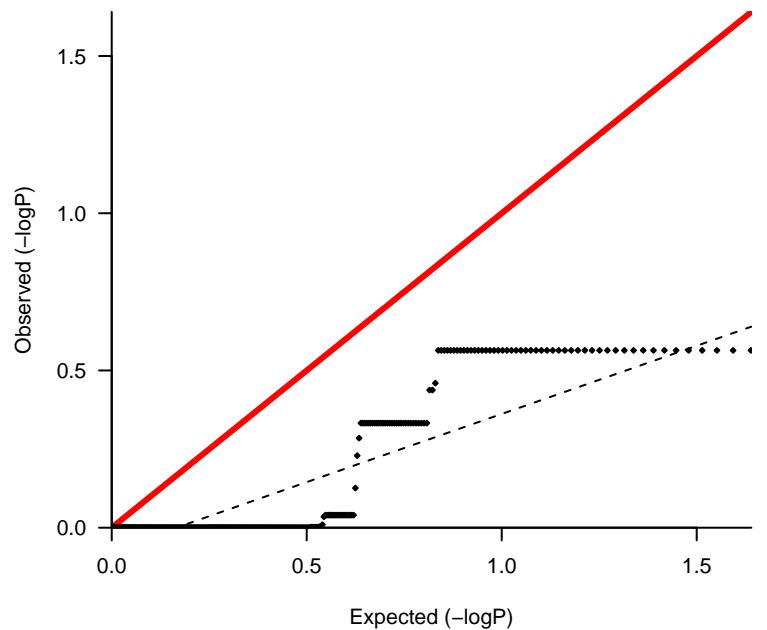

**FT\_V2**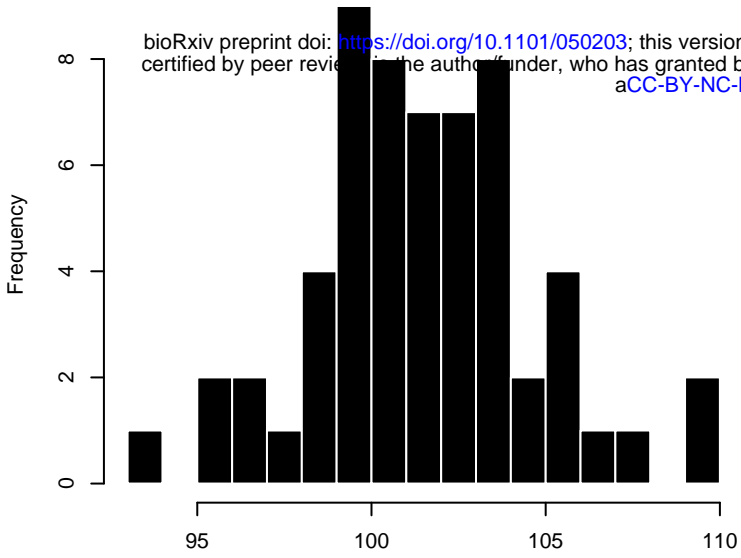**lambda 1.003**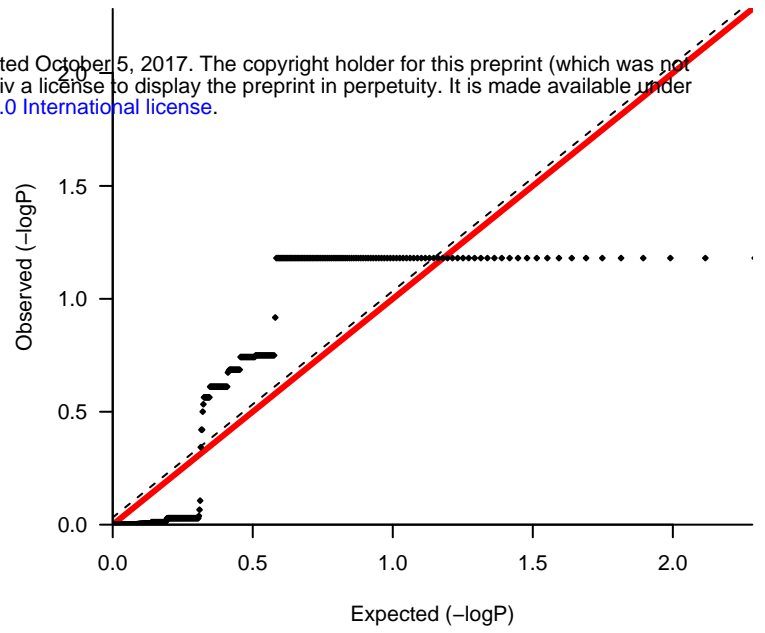**FT\_V3**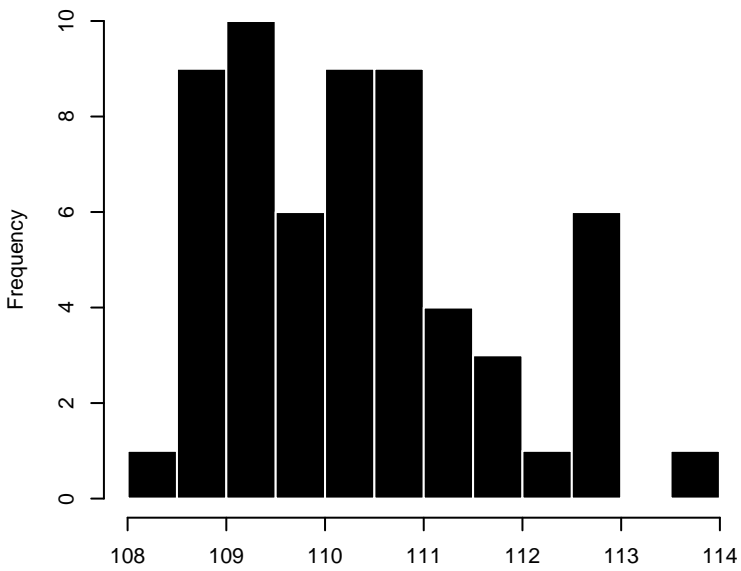**lambda 0.111**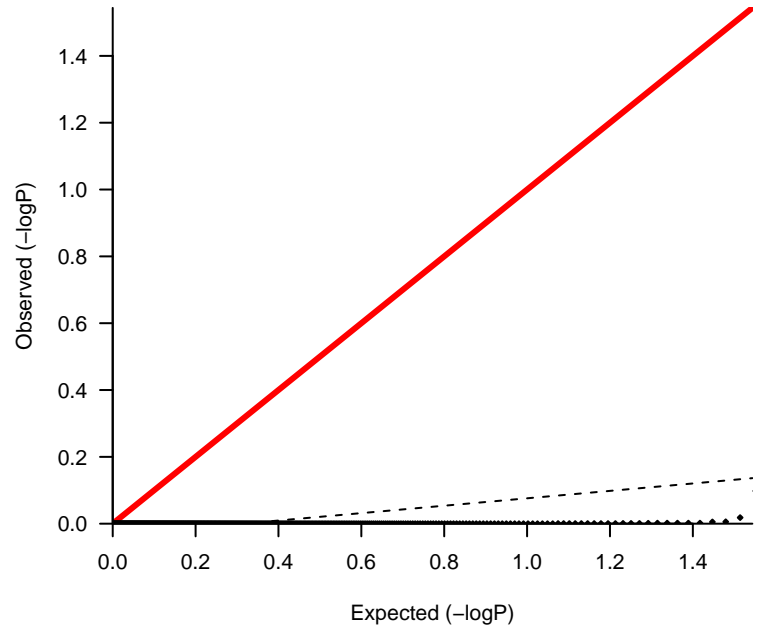**B\_V0**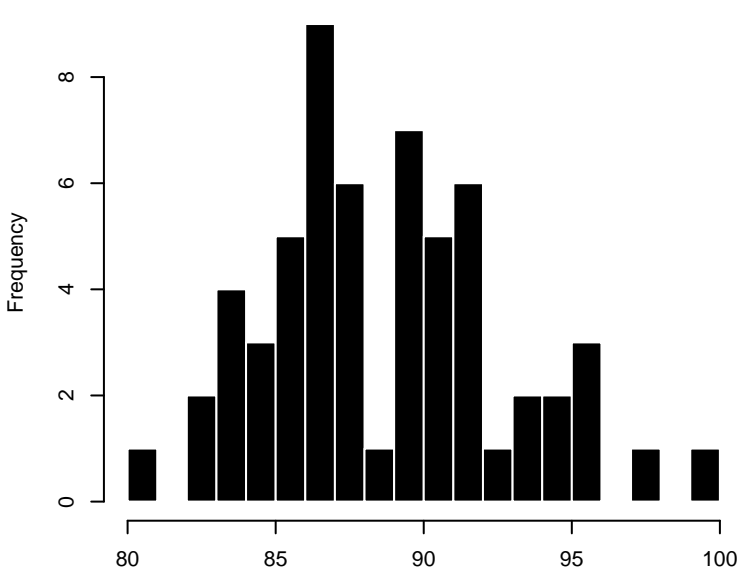**lambda 0.004**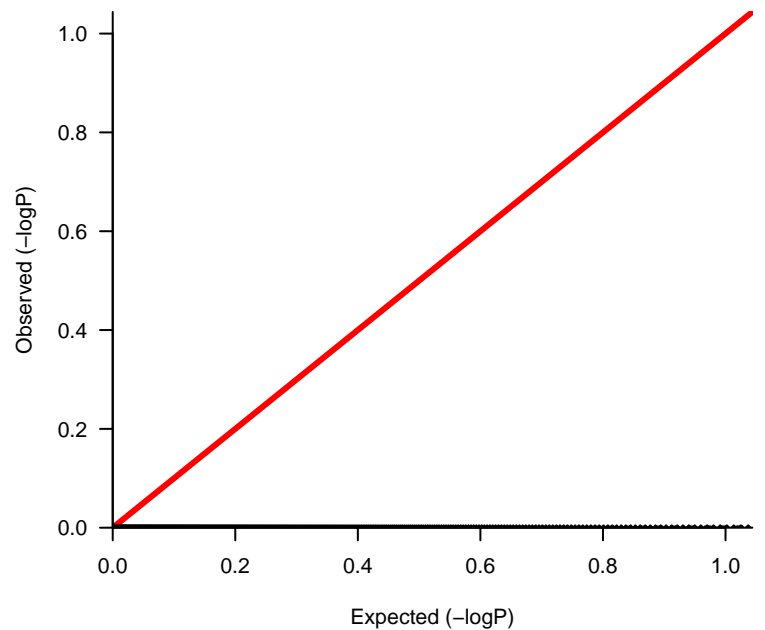

**B\_V1**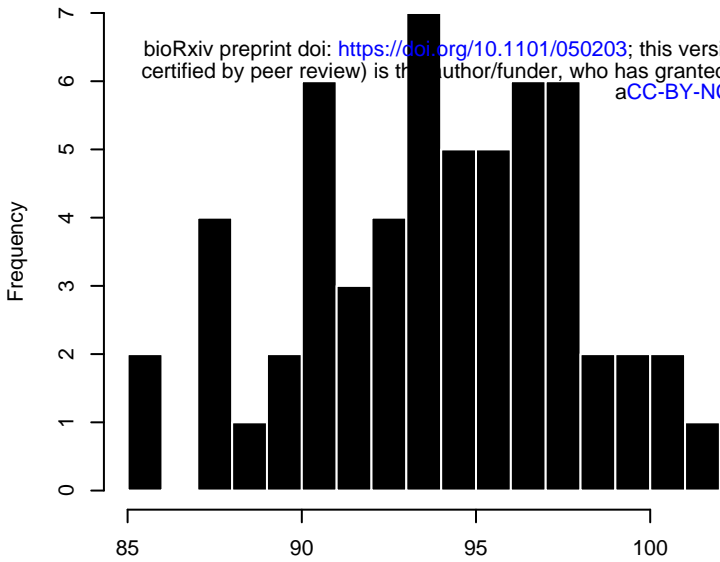**lambda 0.192**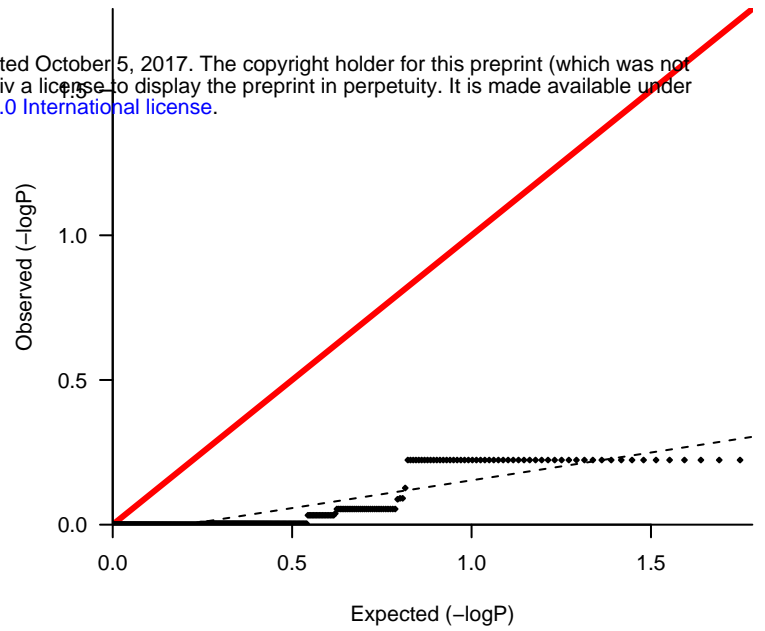**B\_V2**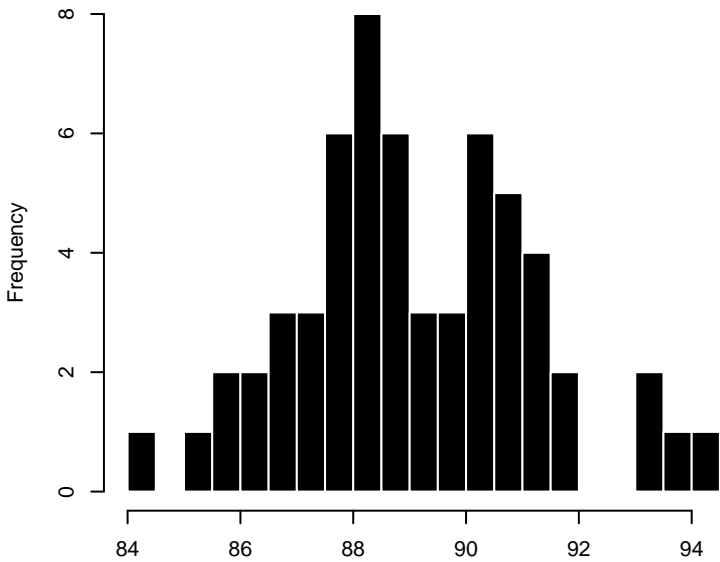**lambda 0.532**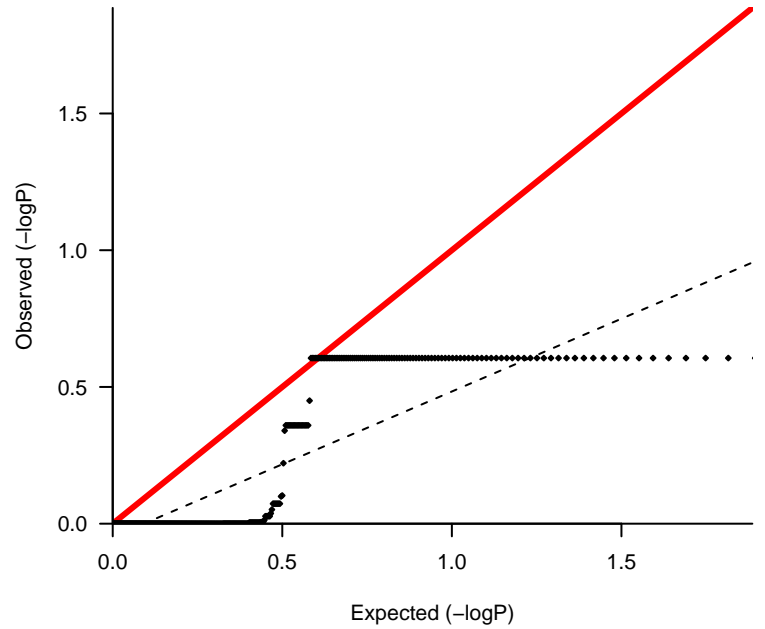**B\_V3**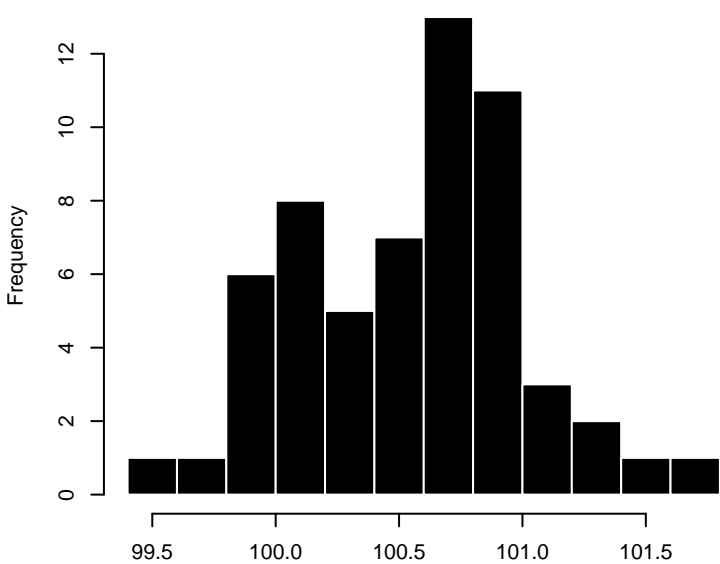**lambda 0.227**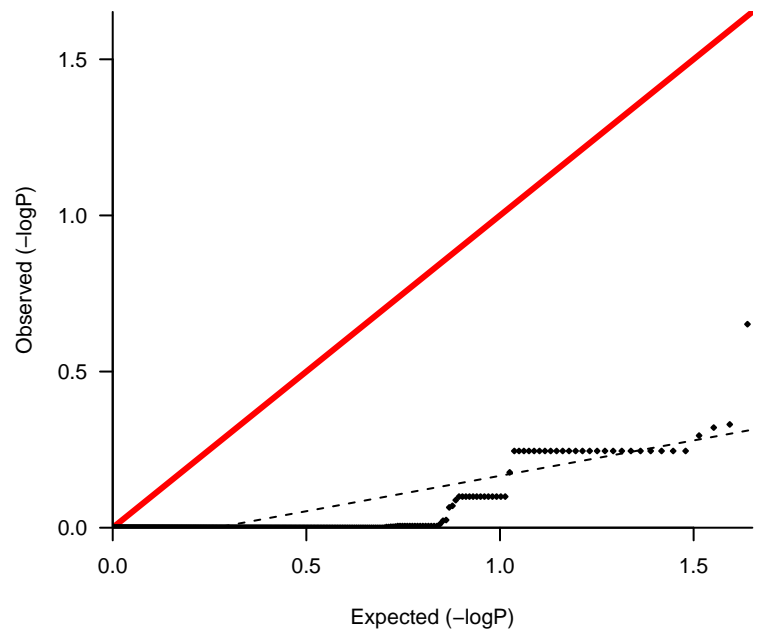

### fecundity

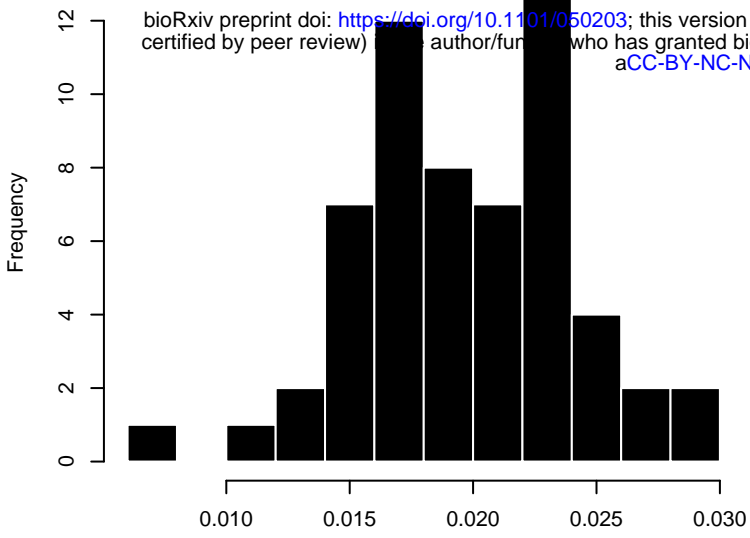

### lambda 0.879

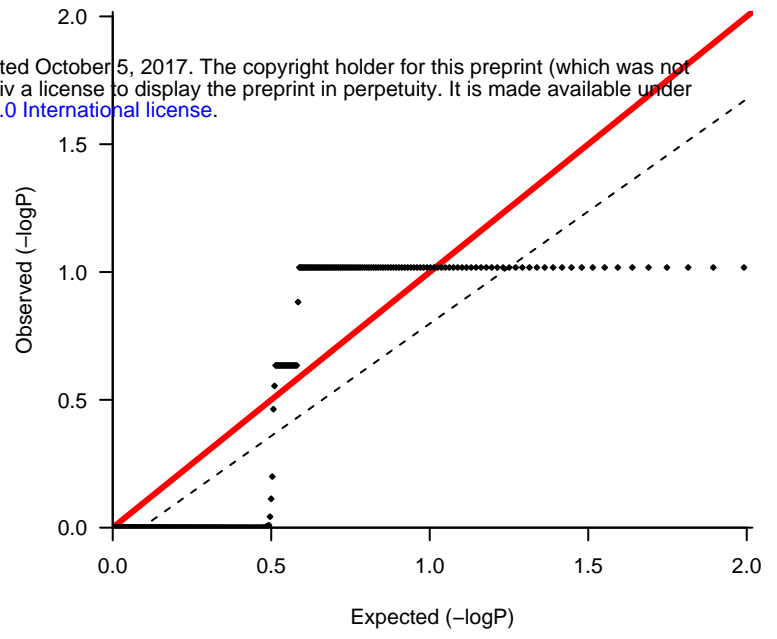



**bio1**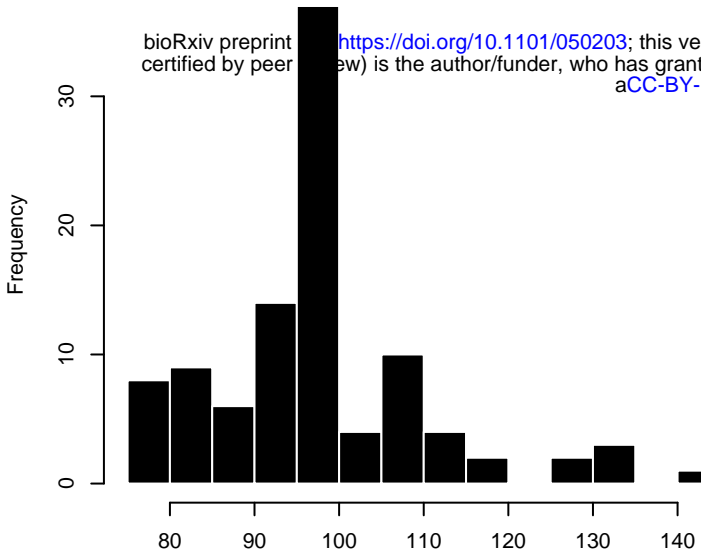**lambda 0.074**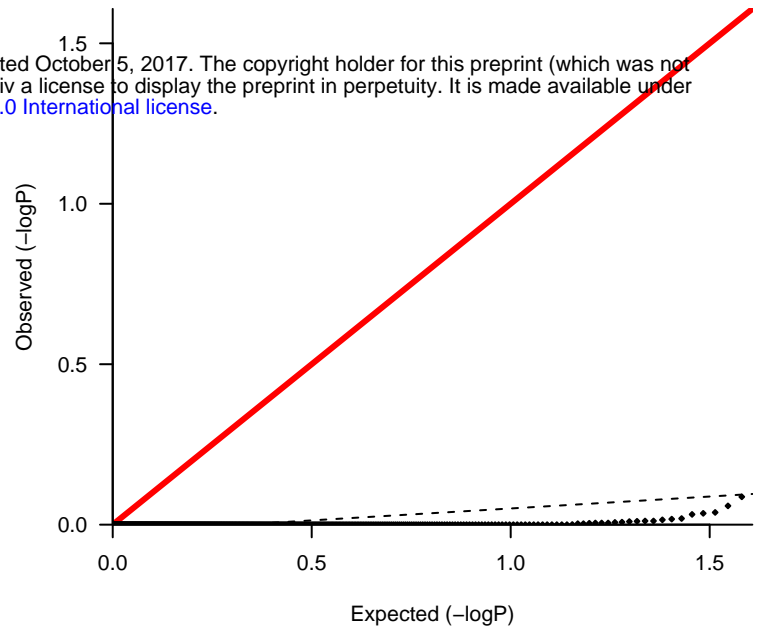**bio2**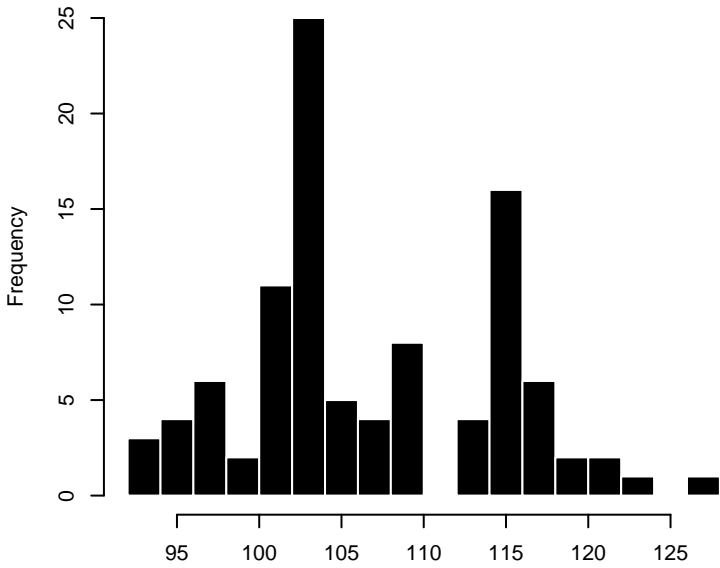**lambda 0.024**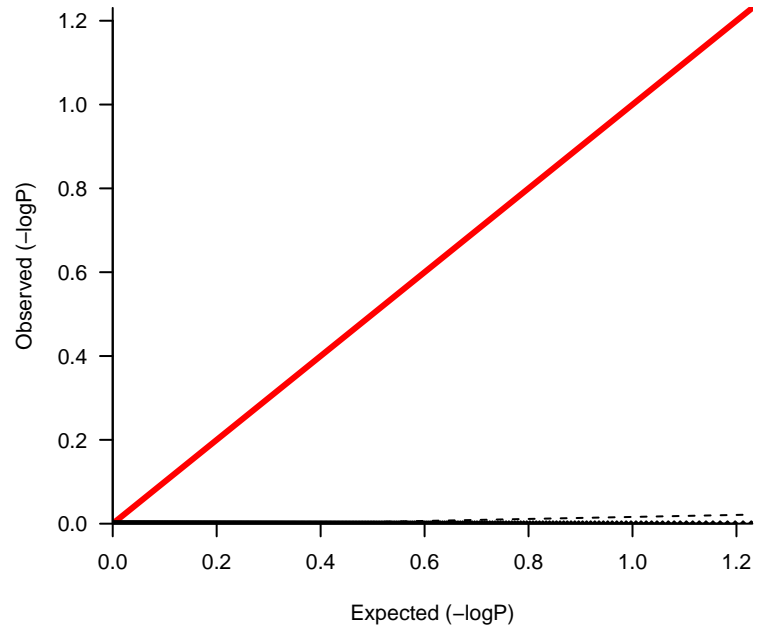**bio3**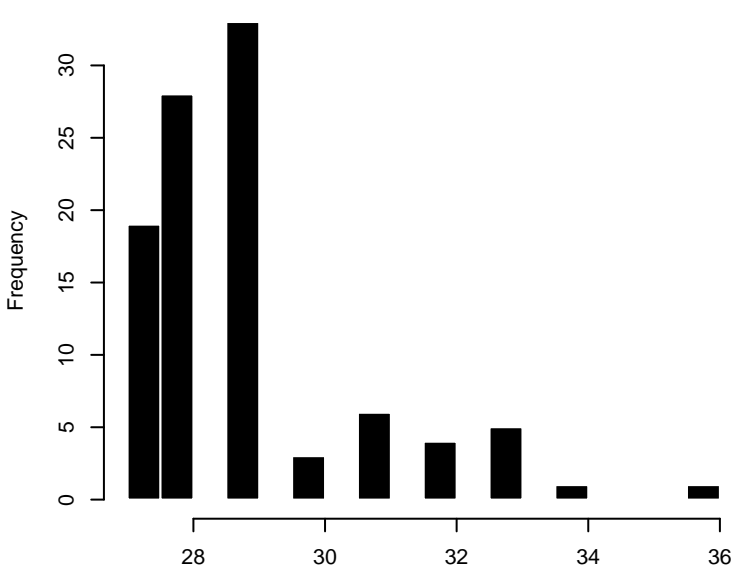**lambda 0.138**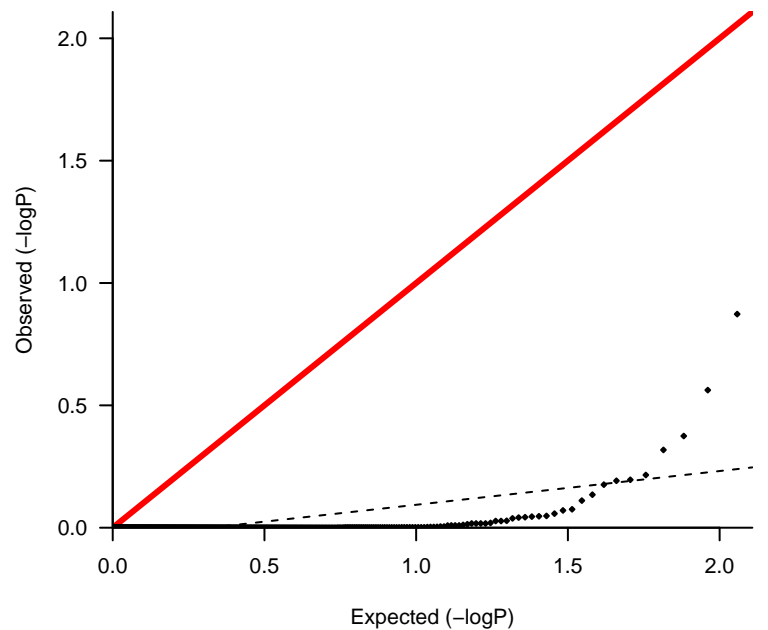

**bio4**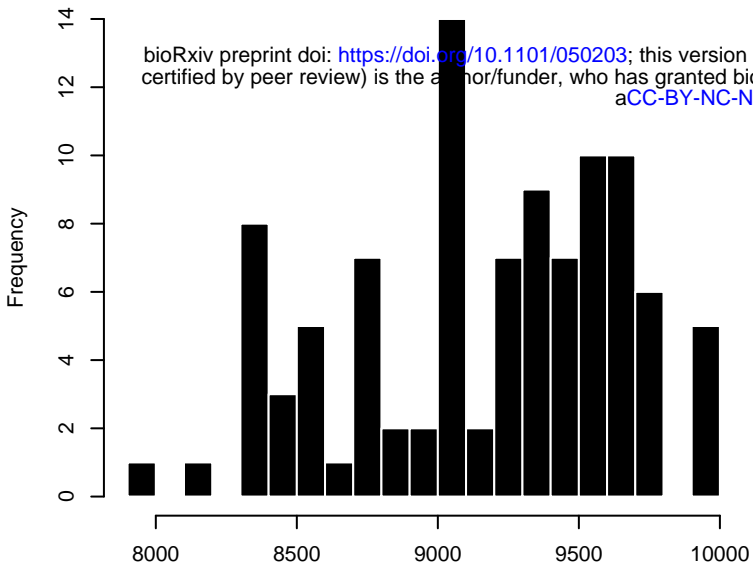**lambda 0.606**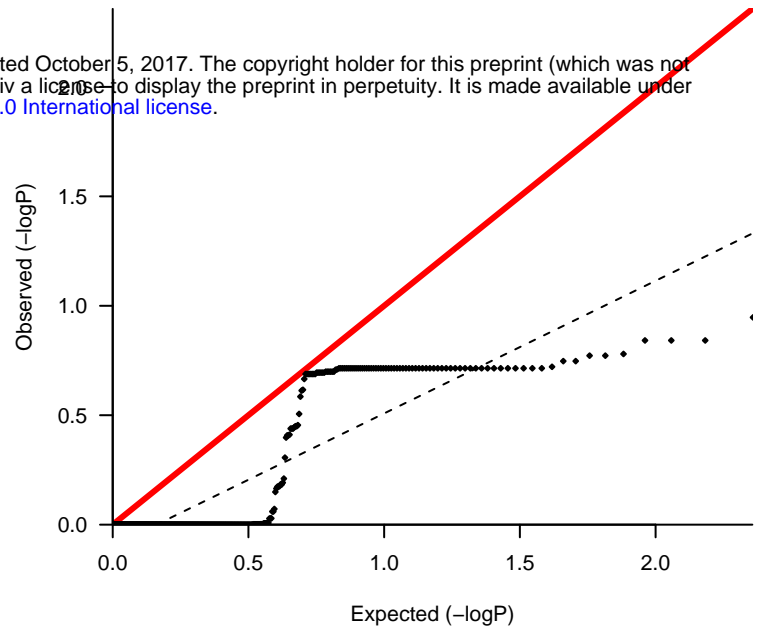**bio5**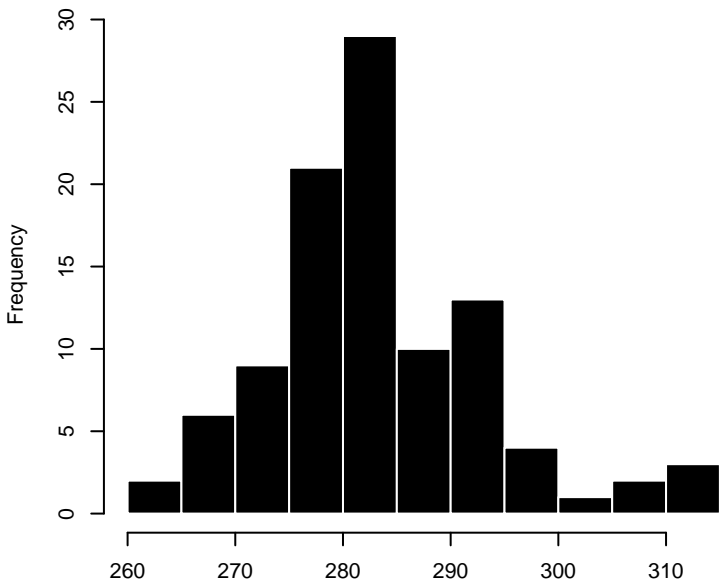**lambda 0.054**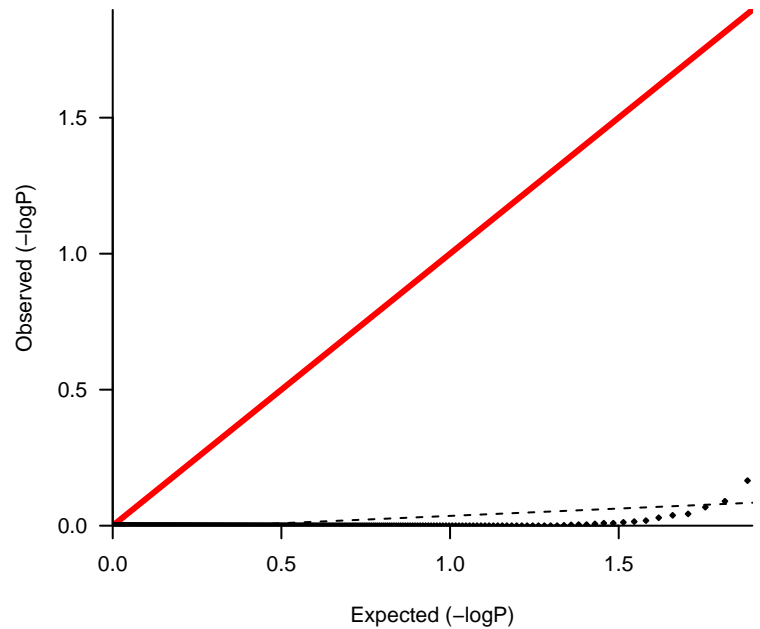**bio6**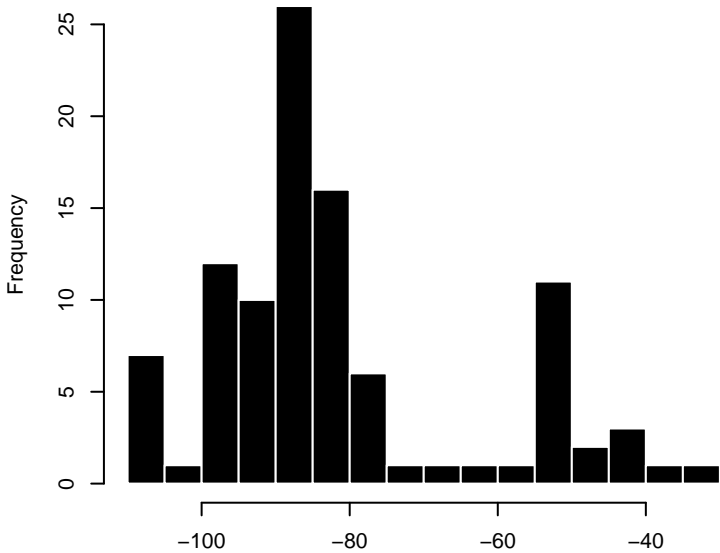**lambda 0.58**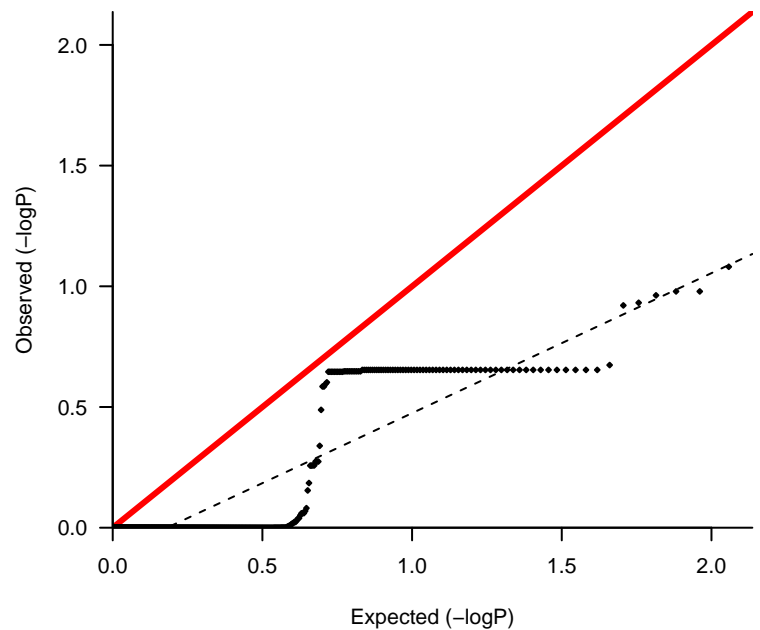

**bio7**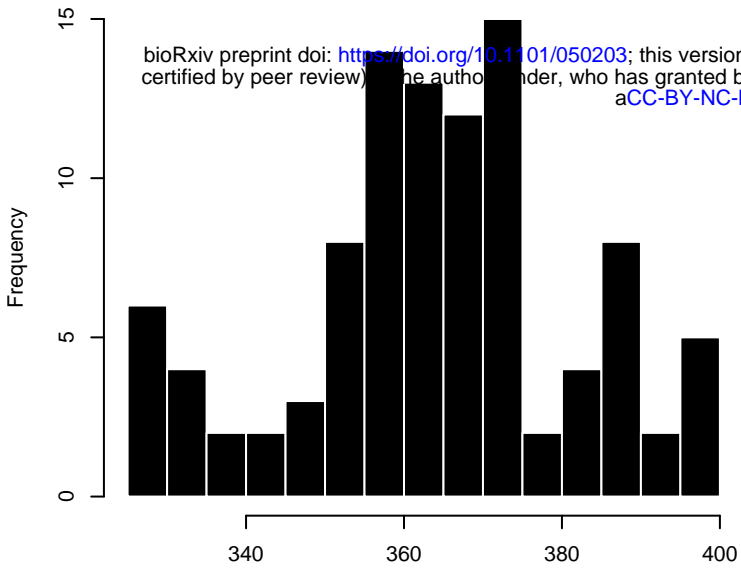**lambda 0.283**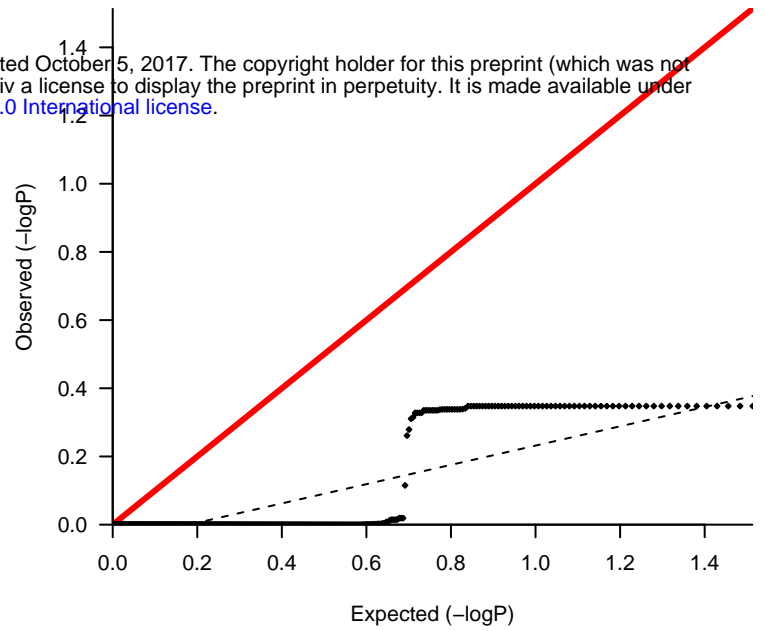**bio8**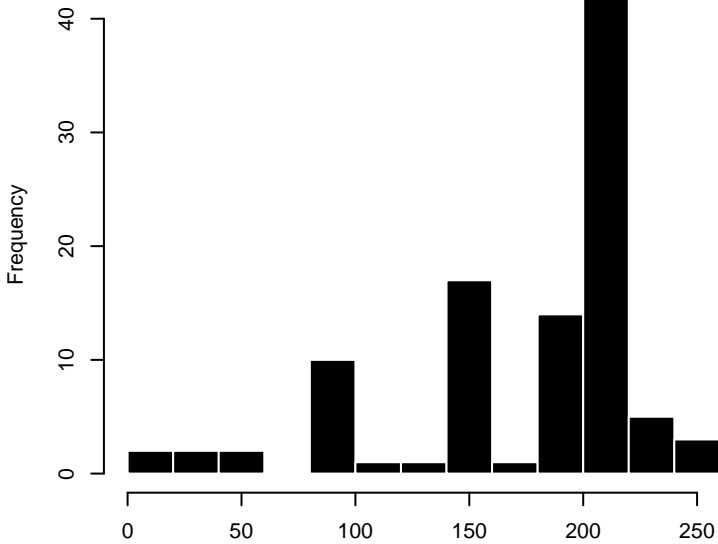**lambda 0.189**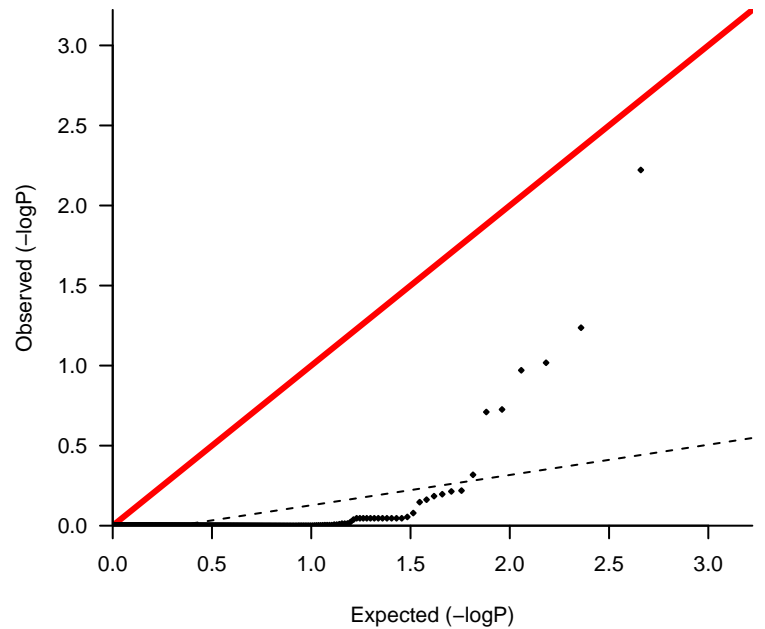**bio9**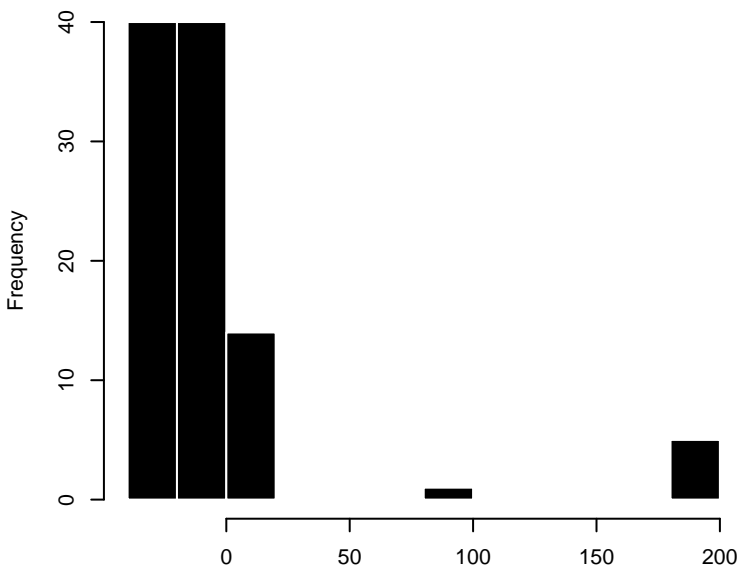**lambda 0.028**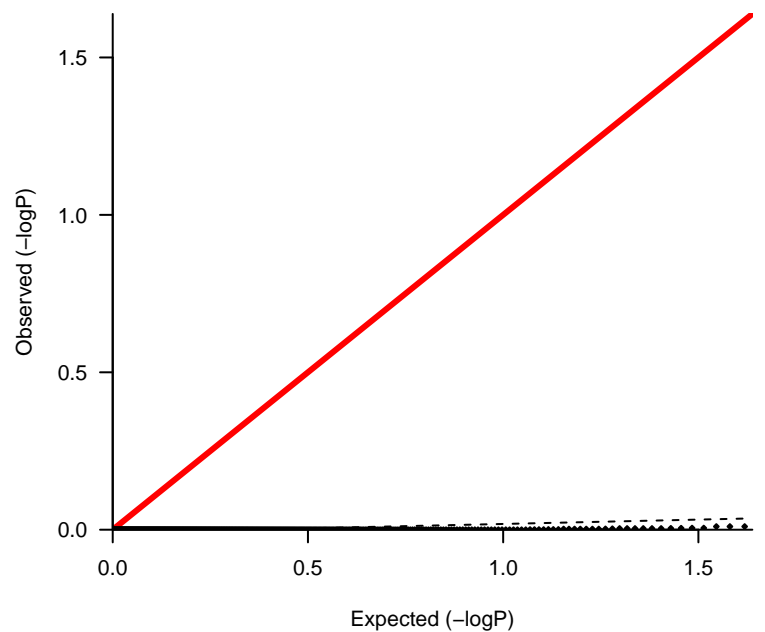

**bio10**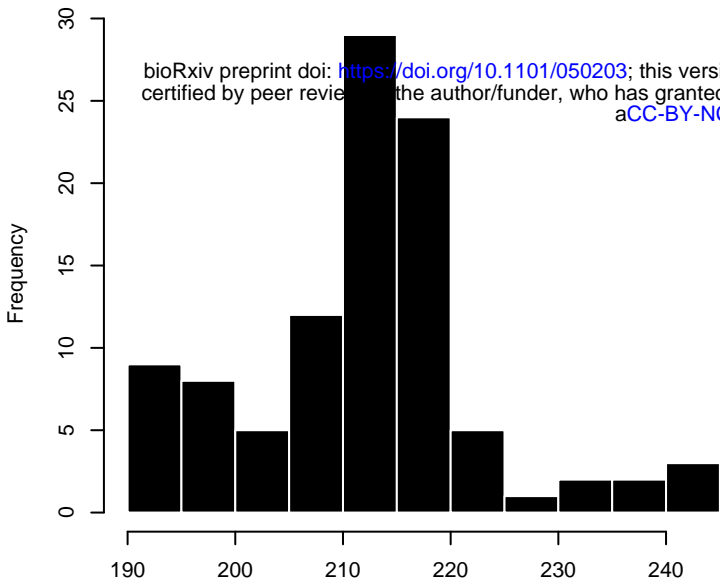**bio11**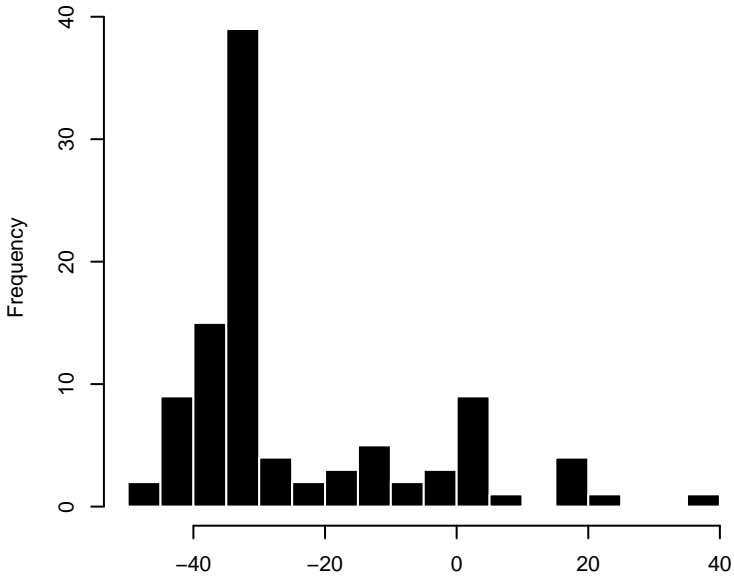**bio12**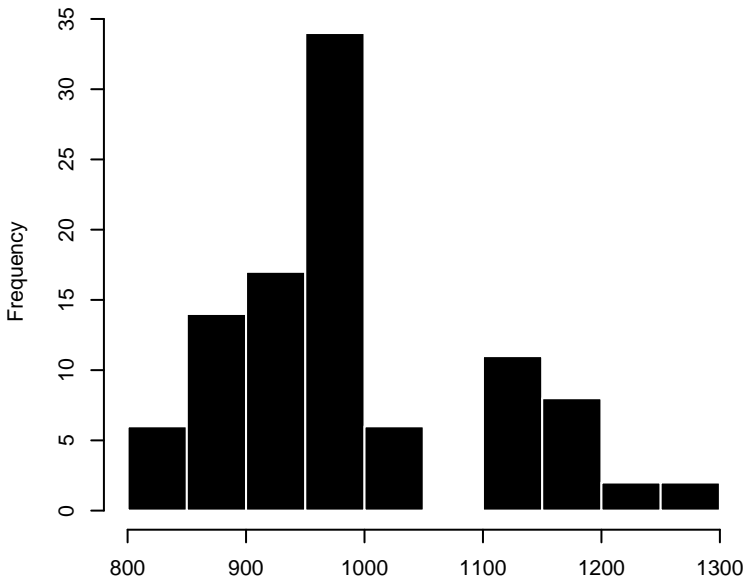

**bio13**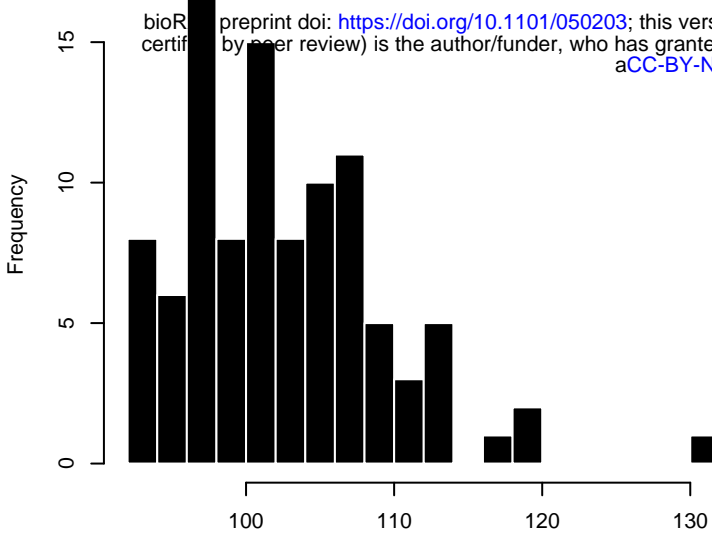**lambda 0.188**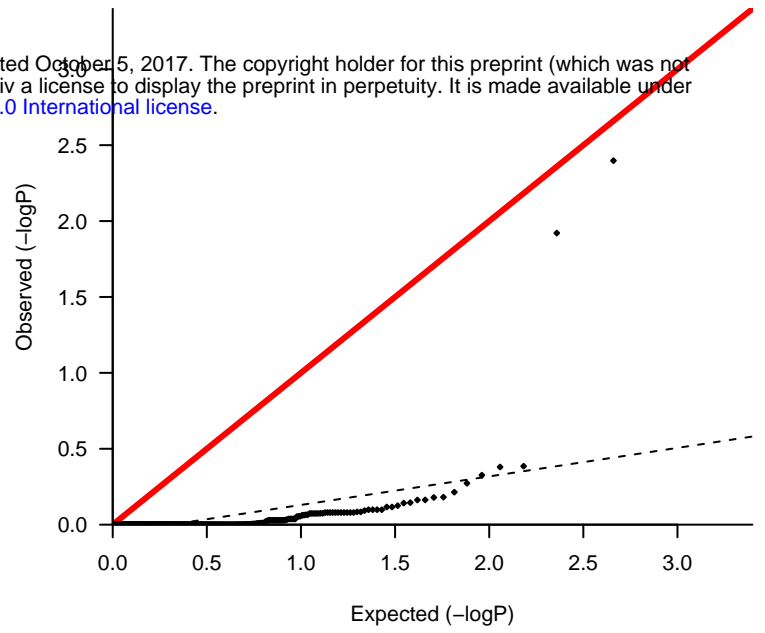**bio14**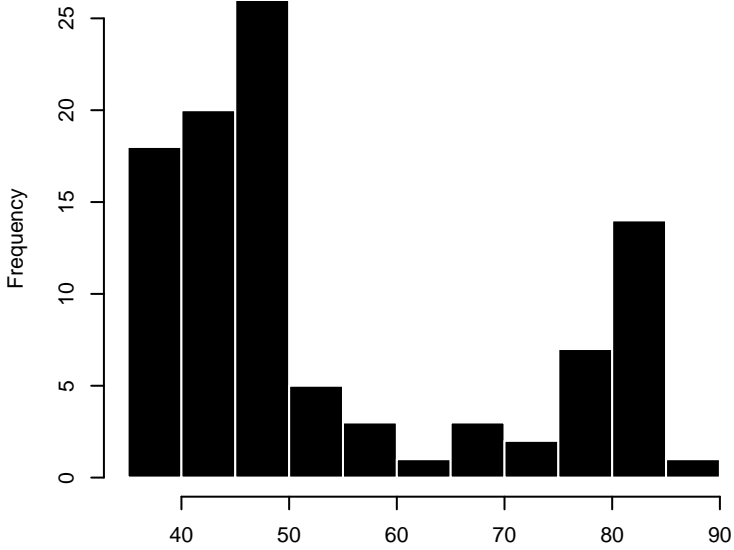**lambda 0.078**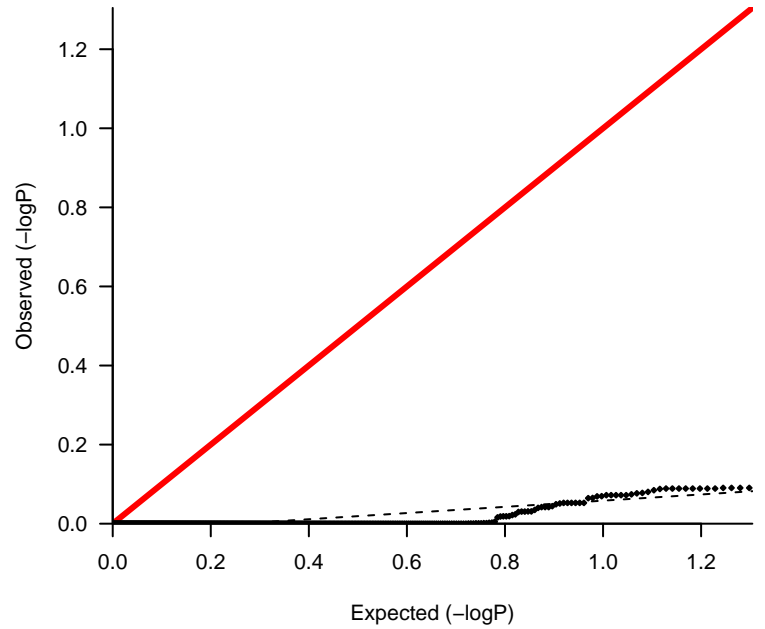**bio15**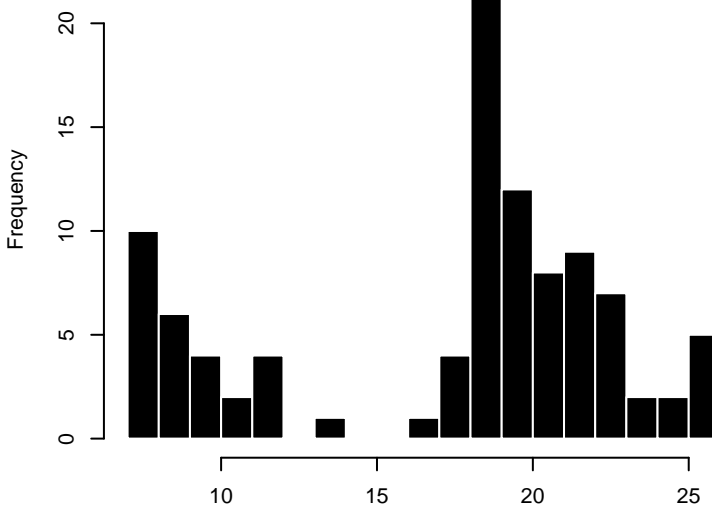**lambda 0.382**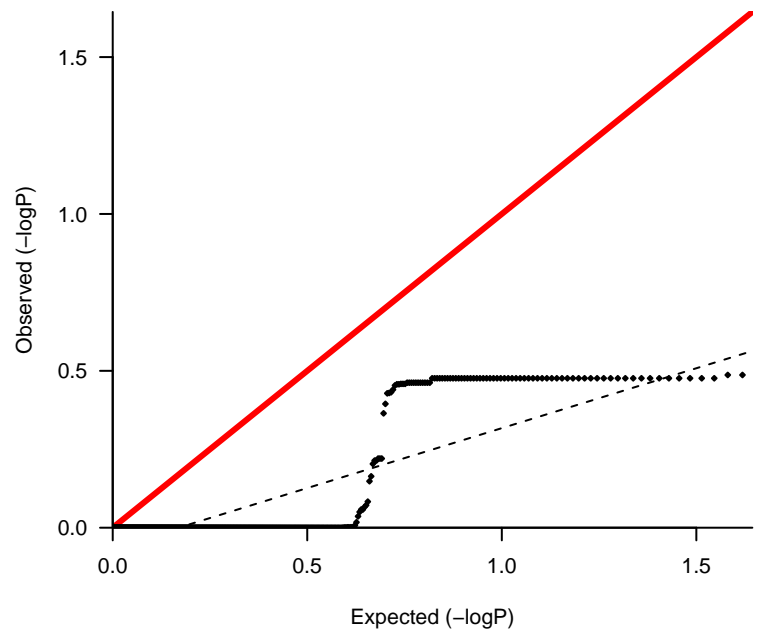

**bio16**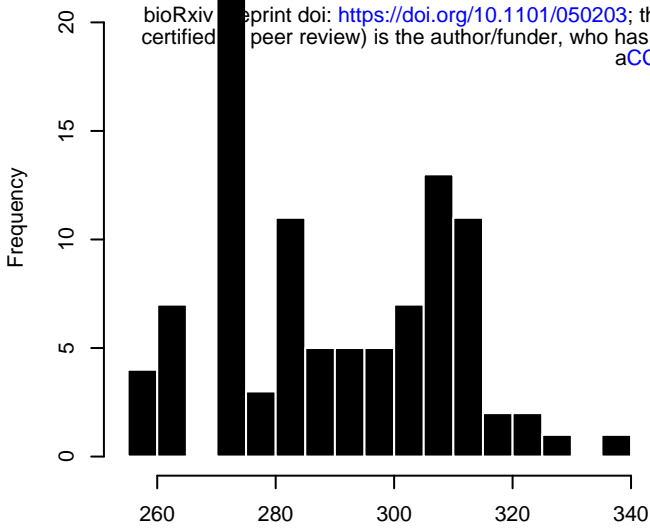**lambda 0.221**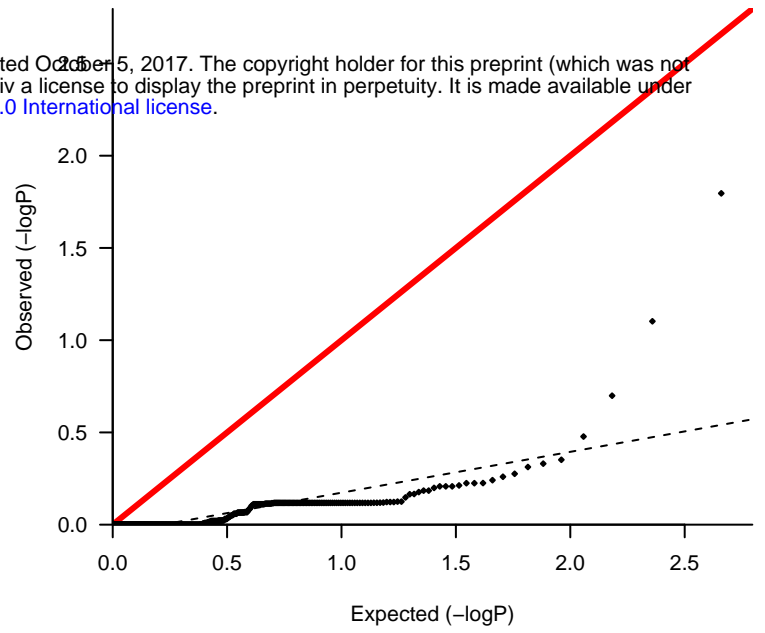**bio17**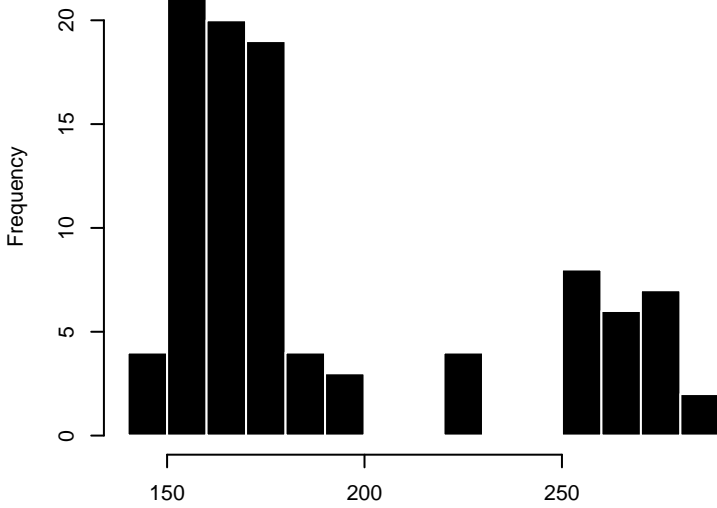**lambda 0.044**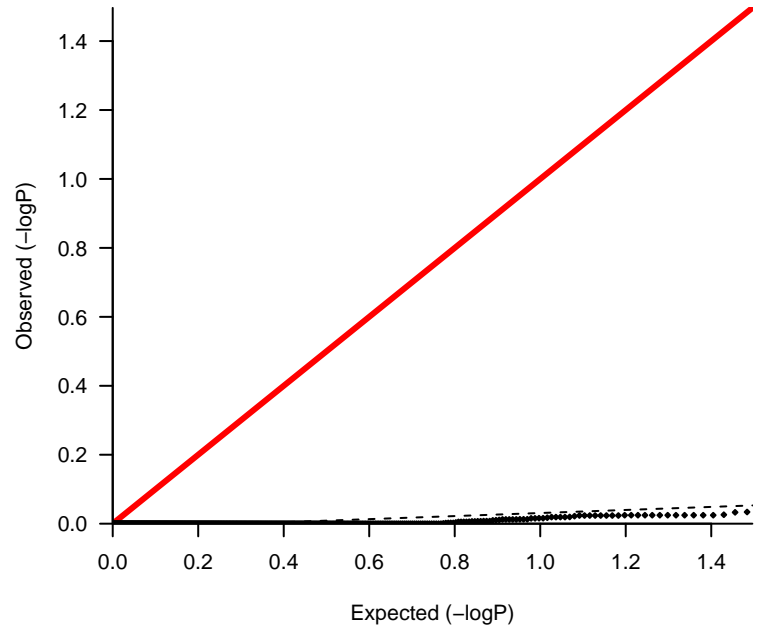**bio18**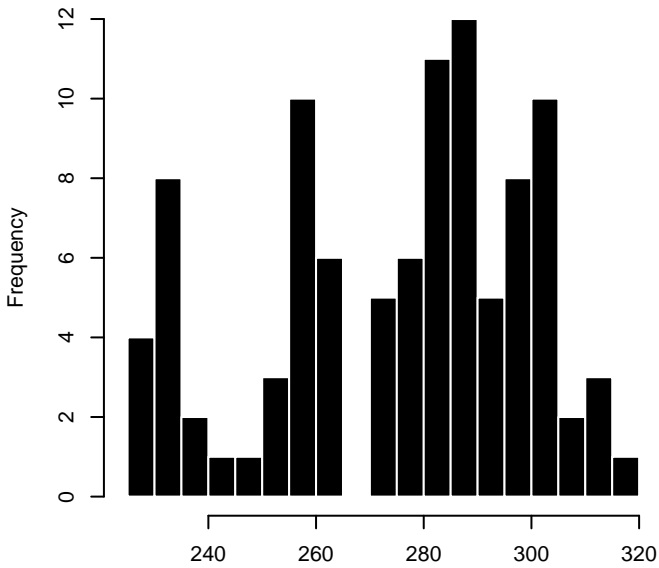**lambda 0.848**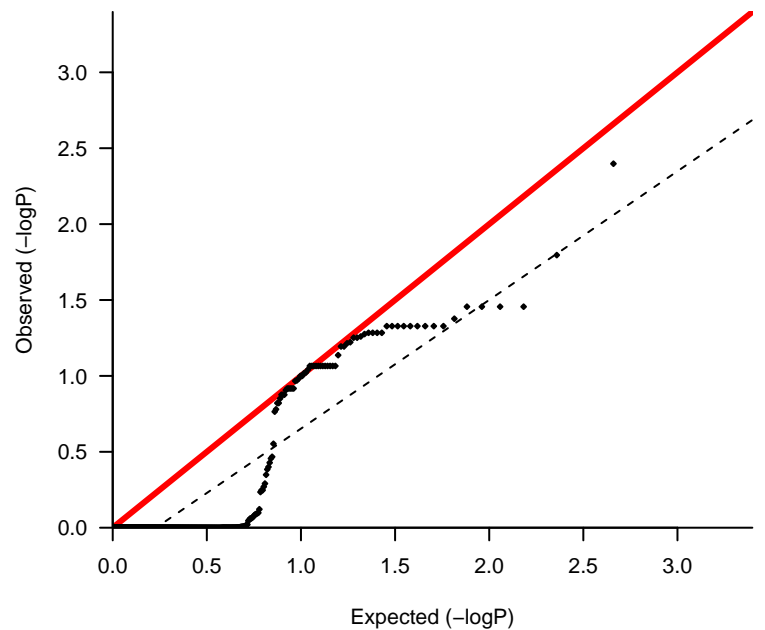

bioRxiv preprint doi: <https://doi.org/10.1101/050203>; this version posted October 5, 2017. The copyright holder for this preprint (which was not certified by peer review) is the author/funder, who has granted bioRxiv a license to display the preprint in perpetuity. It is made available under aCC-BY-NC-ND 4.0 International license.

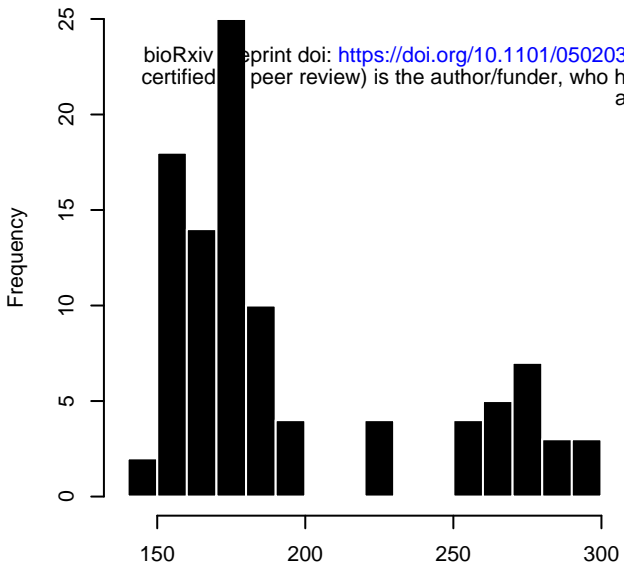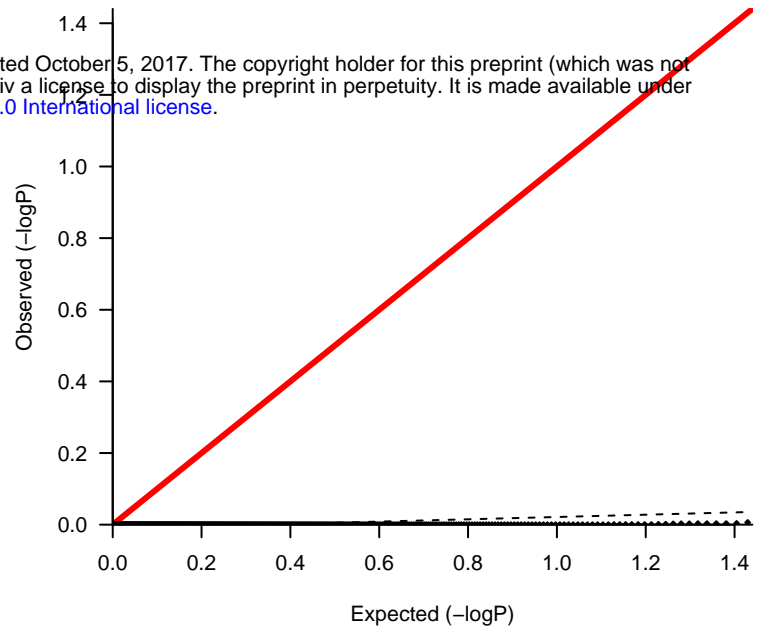

Source: https://www.biorxiv.org/content/10.1101/050203v3.full.pdf
